# Supplementary material for: Association between social isolation and depression onset among older adults: a cross-national longitudinal study in England and Japan
Source: PubMed Central journal article supplement (PMC7978252; doi:10.1136/bmjopen-2020-045834), 2021-03-18
Supplement: bmjopen-2020-045834.draft_revisions.pdf [file bmjopen-2020-045834.draft_revisions.pdf]

# BMJ Open

BMJ Open is committed to open peer review. As part of this commitment we make the peer review history of every article we publish publicly available.

When an article is published we post the peer reviewers' comments and the authors' responses online. We also post the versions of the paper that were used during peer review. These are the versions that the peer review comments apply to.

The versions of the paper that follow are the versions that were submitted during the peer review process. They are not the versions of record or the final published versions. They should not be cited or distributed as the published version of this manuscript.

BMJ Open is an open access journal and the full, final, typeset and author-corrected version of record of the manuscript is available on our site with no access controls, subscription charges or pay-per-view fees (<http://bmjopen.bmj.com>).

If you have any questions on BMJ Open's open peer review process please email [info.bmjopen@bmj.com](mailto:info.bmjopen@bmj.com)

# BMJ Open

## Association between social isolation and depressive symptom onset among older adults: A cross national longitudinal study in England and Japan

|                               |                                                                                                                                                                                                                                                                                                                                                                                                                                                                                                                                                                                                                                                                                                                                                                                                                                                                                                                                                                                                                                                                                                                                                                                                                                                                                                                                                                                                                                                                                                                                                                                                                                                     |
|-------------------------------|-----------------------------------------------------------------------------------------------------------------------------------------------------------------------------------------------------------------------------------------------------------------------------------------------------------------------------------------------------------------------------------------------------------------------------------------------------------------------------------------------------------------------------------------------------------------------------------------------------------------------------------------------------------------------------------------------------------------------------------------------------------------------------------------------------------------------------------------------------------------------------------------------------------------------------------------------------------------------------------------------------------------------------------------------------------------------------------------------------------------------------------------------------------------------------------------------------------------------------------------------------------------------------------------------------------------------------------------------------------------------------------------------------------------------------------------------------------------------------------------------------------------------------------------------------------------------------------------------------------------------------------------------------|
| Journal:                      | <i>BMJ Open</i>                                                                                                                                                                                                                                                                                                                                                                                                                                                                                                                                                                                                                                                                                                                                                                                                                                                                                                                                                                                                                                                                                                                                                                                                                                                                                                                                                                                                                                                                                                                                                                                                                                     |
| Manuscript ID                 | bmjopen-2020-045834                                                                                                                                                                                                                                                                                                                                                                                                                                                                                                                                                                                                                                                                                                                                                                                                                                                                                                                                                                                                                                                                                                                                                                                                                                                                                                                                                                                                                                                                                                                                                                                                                                 |
| Article Type:                 | Original research                                                                                                                                                                                                                                                                                                                                                                                                                                                                                                                                                                                                                                                                                                                                                                                                                                                                                                                                                                                                                                                                                                                                                                                                                                                                                                                                                                                                                                                                                                                                                                                                                                   |
| Date Submitted by the Author: | 13-Oct-2020                                                                                                                                                                                                                                                                                                                                                                                                                                                                                                                                                                                                                                                                                                                                                                                                                                                                                                                                                                                                                                                                                                                                                                                                                                                                                                                                                                                                                                                                                                                                                                                                                                         |
| Complete List of Authors:     | <p>Noguchi, Taiji; National Center for Geriatrics and Gerontology, Department of Social Science, Center for Gerontology and Social Science; Nagoya City University Graduate School of Medical Sciences and Medical School, Department of Public Health</p> <p>Saito, Masashige; Nihon Fukushi University, Faculty of Social Welfare</p> <p>Aida, Jun; Tokyo Medical and Dental University Graduate School of Medical and Dental Sciences, Department of Oral Health Promotion; Tohoku University, Division for Regional Community Development, Liaison Center for Innovative Dentistry</p> <p>Cable, Noriko; University College London, Epidemiology and Public Health</p> <p>Tsuji, Taishi; University of Tsukuba, Faculty of Health and Sport Sciences; Chiba University, Department of Social Preventive Medical Sciences, Center for Preventive Medical Sciences</p> <p>Koyama, Shihoko; Osaka International Cancer Institute, Cancer Control Center</p> <p>Ikeda, Takaaki; Yamagata University Faculty of Medicine Graduate School of Medical Science, Department of Health Policy Science; Tohoku University Graduate School of Dentistry School of Dentistry, Department of International and Community Oral Health</p> <p>Osaka, Ken; Tohoku University Graduate School of Dentistry School of Dentistry, Department of International and Community Oral Health</p> <p>Kondo, Katsunori; Chiba University, Department of Social Preventive Medical Sciences, Center for Preventive Medical Sciences; National Center for Geriatrics and Gerontology, Department of Gerontological Evaluation, Center for Gerontology and Social Science</p> |
| Keywords:                     | EPIDEMIOLOGY, GERIATRIC MEDICINE, Old age psychiatry < PSYCHIATRY, PUBLIC HEALTH, SOCIAL MEDICINE                                                                                                                                                                                                                                                                                                                                                                                                                                                                                                                                                                                                                                                                                                                                                                                                                                                                                                                                                                                                                                                                                                                                                                                                                                                                                                                                                                                                                                                                                                                                                   |
|                               |                                                                                                                                                                                                                                                                                                                                                                                                                                                                                                                                                                                                                                                                                                                                                                                                                                                                                                                                                                                                                                                                                                                                                                                                                                                                                                                                                                                                                                                                                                                                                                                                                                                     |

SCHOLARONE™  
Manuscripts

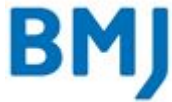

I, the Submitting Author has the right to grant and does grant on behalf of all authors of the Work (as defined in the below author licence), an exclusive licence and/or a non-exclusive licence for contributions from authors who are: i) UK Crown employees; ii) where BMJ has agreed a CC-BY licence shall apply, and/or iii) in accordance with the terms applicable for US Federal Government officers or employees acting as part of their official duties; on a worldwide, perpetual, irrevocable, royalty-free basis to BMJ Publishing Group Ltd ("BMJ") its licensees and where the relevant Journal is co-owned by BMJ to the co-owners of the Journal, to publish the Work in this journal and any other BMJ products and to exploit all rights, as set out in our [licence](#).

The Submitting Author accepts and understands that any supply made under these terms is made by BMJ to the Submitting Author unless you are acting as an employee on behalf of your employer or a postgraduate student of an affiliated institution which is paying any applicable article publishing charge ("APC") for Open Access articles. Where the Submitting Author wishes to make the Work available on an Open Access basis (and intends to pay the relevant APC), the terms of reuse of such Open Access shall be governed by a Creative Commons licence – details of these licences and which [Creative Commons](#) licence will apply to this Work are set out in our licence referred to above.

Other than as permitted in any relevant BMJ Author's Self Archiving Policies, I confirm this Work has not been accepted for publication elsewhere, is not being considered for publication elsewhere and does not duplicate material already published. I confirm all authors consent to publication of this Work and authorise the granting of this licence.

1  
2  
3  
4  
5  
6 **1 Original research**

7  
8  
9 **2 Title**

10  
11  
12 **3 Association between social isolation and depressive symptom onset among older adults:**

13  
14  
15 **4 A cross-national longitudinal study in England and Japan**

16  
17  
18 **5**

19  
20  
21 **6 Taiji Noguchi<sup>1,2\*</sup>, Masashige Saito<sup>3</sup>, Jun Aida<sup>4,5</sup>, Noriko Cable<sup>6</sup>, Taishi Tsuji<sup>7,8</sup>, Shihoko**

22  
23  
24 **7 Koyama<sup>9</sup>, Takaaki Ikeda<sup>10,11</sup>, Ken Osaka<sup>11</sup>, Katsunori Kondo<sup>1,8</sup>**

25  
26  
27 **8**

28  
29  
30 **9 <sup>1</sup>Center for Gerontology and Social Science, National Center for Geriatrics and**  
31  
32 **Gerontology, Aichi, Japan**

33  
34  
35 **10 <sup>2</sup>Department of Public Health, Nagoya City University Graduate School of Medical**  
36  
37 **Sciences, Aichi, Japan**

38  
39  
40 **11 <sup>3</sup>Faculty of Social Welfare, Nihon Fukushi University, Aichi, Japan**

41  
42  
43 **12 <sup>4</sup>Department of Oral Health Promotion, Graduate School of Medical and Dental Sciences,**  
44  
45 **Tokyo Medical and Dental University, Tokyo, Japan**

46  
47  
48 **13 <sup>5</sup>Division for Regional Community Development, Liaison Center for Innovative**  
49  
50 **Dentistry, Graduate School of Dentistry, Tohoku University, Miyagi, Japan**

51  
52  
53 **14 <sup>6</sup>Department of Epidemiology and Public Health, University College London, London,**

1  
2  
3  
4  
5  
6 19 UK

7  
8  
9 20 <sup>7</sup>Faculty of Health and Sport Sciences, University of Tsukuba, Tokyo, Japan

10  
11  
12 21 <sup>8</sup>Department of Social Preventive Medical Sciences, Center for Preventive Medical  
13  
14  
15 22 Sciences, Chiba University, Chiba, Japan

16  
17  
18 23 <sup>9</sup>Cancer Control Center, Osaka International Cancer Institute, Osaka, Japan

19  
20  
21 24 <sup>10</sup>Department of Health Policy Science, Graduate School of Medical Science, Yamagata  
22  
23  
24 25 University, Yamagata, Japan

25  
26  
27 26 <sup>11</sup>Department of International and Community Oral Health, Tohoku University Graduate  
28  
29  
30 27 School of Dentistry, Miyagi, Japan

31  
32  
33 28

34  
35  
36 29 **\*Corresponding author**

37  
38  
39 30 7-430 Morioka, Obu, Aichi 474-8511, Japan

40  
41  
42 31 E-mail: [noguchi.taiji0415@gmail.com](mailto:noguchi.taiji0415@gmail.com)

43  
44  
45 32 Tel: +81-562-46-2311; Fax: +81-562-48-7474

46  
47  
48 33

49  
50  
51 34 **Word count:** 2534 words

1  
2  
3  
4  
5  
6  
7  
8  
9  
10  
11  
12  
13  
14  
15  
16  
17  
18  
19  
20  
21  
22  
23  
24  
25  
26  
27  
28  
29  
30  
31  
32  
33  
34  
35  
36  
37  
38  
39  
40  
41  
42  
43  
44  
45  
46  
47  
48  
49  
50  
51  
52  
53  
54  
55  
56  
57  
58  
59  
60

35 **ABSTRACT**

36 **Objective:** Social isolation is a risk factor for depressive symptoms in older age. However,  
37 little is known about whether its impact varies depending on country-specific cultural  
38 contexts of social relationships, such as friendships or family-based relationships. This  
39 study examined the association of social isolation with depressive symptom onset in older  
40 adults in England, which values friendship-based relationships, and Japan, where family-  
41 based relationships are emphasised.

42 **Design:** Prospective longitudinal study.

43 **Setting:** We utilized data from two ongoing studies: the English Longitudinal Study of  
44 Ageing (ELSA) and the Japan Gerontological Evaluation Study (JAGES).

45 **Participants:** Older adults aged  $\geq 65$  years without depressive symptoms at baseline were  
46 followed up regarding depressive symptom onset for two years (2010/11 to 2012/13) for  
47 the ELSA and 2.5 years (2010/11 to 2013) for the JAGES.

48 **Primary outcome measure:** Depressive symptoms were assessed with the Center for  
49 Epidemiologic Studies Depression Scale for the ELSA and Geriatric Depression Scale  
50 for the JAGES. Multivariable logistic regression analysis was performed to evaluate  
51 social isolation using multiple parameters (marital status; interaction with children,  
52 relatives, and friends; and social participation).

1  
2  
3  
4  
5  
6  
7 53 **Results:** The data of 3,331 respondents from the ELSA and 33,127 from the JAGES were  
8  
9 54 analysed. Multivariable logistic regression analysis demonstrated that social isolation was  
10  
11  
12 55 significantly associated with depressive symptom onset in both countries. In the ELSA,  
13  
14  
15 56 poor interaction with children marginally affected depressive symptom onset, while in  
16  
17  
18 57 the JAGES, poor interaction with children and no social participation significantly  
19  
20  
21 58 affected depressive symptom onset.  
22

23  
24 59 **Conclusions:** Despite variations in cultural background, social isolation was associated  
25  
26  
27 60 with depressive symptom onset in both England and Japan. Addressing social isolation  
28  
29  
30 61 to safeguard older adults' mental health must be globally prioritised.  
31  
32

### 33 62

### 34 63 **Strengths and limitations of this study**

- 35  
36  
37 64 ● This is the first cross-national longitudinal study to examine the association between  
38  
39  
40  
41  
42 65 social isolation and depressive symptom onset in England, which values friendship-  
43  
44  
45 66 based relationships, and Japan, where family-based relationships are emphasised.  
46  
47
- 48  
49 67 ● This study included a large sample of over 3,300 people from England and 33,000  
50  
51  
52 68 people from Japan aged 65 years and older.  
53
- 54  
55 69 ● A limitation of this study is that we cannot make direct comparisons because of  
56  
57  
58 70 variations in cohort follow-up periods and depressive symptom measurement.  
59  
60

- 1  
2  
3  
4  
5  
6  
7 71 ● Another limitation is the substitution of social support for the evaluation of social  
8  
9 72 contact so as to use the same social isolation assessment scale in both countries.  
10  
11  
12 73  
13  
14  
15  
16  
17  
18  
19  
20  
21  
22  
23  
24  
25  
26  
27  
28  
29  
30  
31  
32  
33  
34  
35  
36  
37  
38  
39  
40  
41  
42  
43  
44  
45  
46  
47  
48  
49  
50  
51  
52  
53  
54  
55  
56  
57  
58  
59  
60

For peer review only



## 74 INTRODUCTION

75 With population ageing, there is growing worldwide interest in social issues concerning  
76 older adults, including social isolation and the deterioration of physical and mental health.  
77 Defined as an objective state where an individual has few close relationships or limited  
78 contact within a community,[1] social isolation is recognised as a social determinant of  
79 health with relevance to mortality,[2] cardiovascular diseases,[3] dementia,[4] and mental  
80 health.[5, 6] Social isolation is a major risk factor for mental health problems in older  
81 age. Several systematic reviews have shown that social isolation is associated with  
82 depressive symptoms,[5, 6] which, in turn, are correlated with unhealthy behaviours and  
83 reduced access to material resources.[7] Depressive symptoms, common in later life, are  
84 related to adverse health outcomes such as poor quality of life[8] and functional  
85 disability.[9] With the high current global burden of depression expected to increase  
86 further by 2030,[10] addressing social isolation is an important gerontological issue for  
87 protecting mental health in older adults.

88 The impacts of social isolation on health may vary by country; these differences  
89 arise from the culture relating to social networks within and outside the family. A previous  
90 cross-national study showed that in the UK, friendship-based social relationships had a  
91 significant impact on longevity, whereas in Japan, this impact was associated with family-

1  
2  
3  
4  
5  
6 92 based social relationships.[11] Another study comparing American and Japanese older  
7  
8  
9 93 adults suggested that the presence of children was associated with depressive symptoms  
10  
11  
12 94 only among the latter.[12] As Japan has retained the traditionally strong influence of  
13  
14  
15 95 family and kinship systems on society[13] and the expected reciprocity between adult  
16  
17  
18 96 children and their parents remains a dominant feature,[14] the emphasis on family-based  
19  
20  
21 97 relationships is stronger than it is in the West.  
22

23  
24 98 Moreover, the social structure surrounding social isolation varies from country to  
25  
26  
27 99 country. Recognising the impact of social isolation on health and economic loss, the UK  
28  
29  
30 100 established the position of ‘Minister of Loneliness’ in 2018 and is taking a progressive  
31  
32  
33 101 approach to eliminating social isolation.[15] In contrast, Japan, now a super-aged society,  
34  
35  
36 102 is experiencing a rapid increase in the trend of abstaining from marriage and weakening  
37  
38  
39 103 community and neighbourhood relations,[16] leading to a rise in the number of socially  
40  
41  
42 104 isolated people.[17] In Japan, the proportion of people who rarely or never spent time  
43  
44  
45 105 with those close to them was the highest among Organisation for Economic Co-operation  
46  
47  
48 106 and Development countries. In particular, this figure was much higher than in the UK,  
49  
50  
51 107 which has made advances in tackling social isolation (Japan = 15.3%, UK = 5.0%).[18]  
52  
53  
54 108 Owing to differences in the cultural contexts of social relationships and structures, the  
55  
56  
57 109 impact of social isolation on depressive symptoms is expected to vary across countries.  
58  
59  
60

1  
2  
3  
4  
5  
6 110 As the association between social isolation and depressive symptoms is often  
7  
8  
9 111 described as bidirectional,[19] longitudinal studies are needed to determine causality.  
10  
11  
12 112 However, previous cross-national comparative studies have only employed cross-  
13  
14  
15 113 sectional designs.[12] Therefore, using longitudinal data from both countries, the present  
16  
17  
18 114 study aims to investigate the association of social isolation with depressive symptom  
19  
20  
21 115 onset in England, where the emphasis is on friendship-based relationships, and Japan,  
22  
23  
24 116 which prioritises familial relationships.  
25  
26

27 117

30 118 **METHODS**33 119 **Sample**

34  
35  
36 120 This longitudinal study was conducted using data from two ongoing prospective cohort  
37  
38  
39 121 studies: the English Longitudinal Study of Ageing (ELSA) and the Japan Gerontological  
40  
41  
42 122 Evaluation Study (JAGES). The ELSA targets independent-living older adults aged  $\geq 50$ ,  
43  
44  
45 123 while JAGES participants are community-dwelling individuals aged  $\geq 65$  who are  
46  
47  
48 124 ineligible for long-term healthcare insurance benefits.[20] Details of the ELSA and  
49  
50  
51 125 JAGES can be found elsewhere.[21, 22] For the present analysis, we used the two waves  
52  
53  
54 126 of data that most closely corresponded with the timing of our study: wave 5 (2010/2011)  
55  
56  
57 127 to wave 6 (2012/2013) for the ELSA, and wave 1 (2010/2011) to wave 2 (2013) for the  
58  
59  
60

1  
2  
3  
4  
5  
6 128 JAGES. We harmonised the data by including older adults aged  $\geq 65$ , independent in  
7  
8  
9 129 activities of daily living, and without self-reported dementia. Respondents with  
10  
11  
12 130 depressive symptoms at baseline were excluded, and we followed up the onset of  
13  
14  
15 131 depressive symptoms for two years for the ELSA and 2.5 years for the JAGES.  
16  
17

18 132

### 19 133 **Depressive symptoms**

20  
21  
22  
23  
24 134 Based on a previous cross-national study,[23] depressive symptoms were measured both  
25  
26  
27 135 at baseline and follow-up using eight items from the Center for Epidemiologic Studies  
28  
29  
30 136 Depression Scale (CES-D) in the ELSA[24] and the Geriatric Depression Scale (GDS-  
31  
32  
33 137 15) in the JAGES.[25] To identify possible depressive cases, the CES-D cut-off was  $\geq 4$   
34  
35  
36 138 while that for the GDS-15 was  $\geq 5$ . [24]  
37  
38

39 139

### 40 140 **Social isolation**

41  
42  
43  
44  
45 141 Social isolation levels were assessed using the modified Social Isolation Index (SII).[26]  
46  
47  
48 142 The index was computed with respondents given a point if they: (1) were unmarried or  
49  
50  
51 143 living alone, (2) had poor interaction with children (no children or no social support from  
52  
53  
54 144 children), (3) had poor interaction with relatives (no relatives or no social support from  
55  
56  
57 145 relatives), (4) had poor interaction with friends (less than monthly contact or no social  
58  
59  
60

1  
2  
3  
4  
5  
6 146 support from friends), and (5) had no social participation (no participation in any social  
7  
8  
9 147 or religious groups). The total possible score ranged from 0 to 5, with higher scores  
10  
11  
12 148 indicating greater social isolation. The participants were categorised into the following  
13  
14  
15 149 five groups based on their scores: 0, 1, 2, 3, and 4–5 points. We used the total score and  
16  
17  
18 150 the scores of the five sub-components as predictive variables.  
19  
20

21 151

## 22 23 24 152 **Covariates**

25  
26  
27 153 The covariates included age, gender, educational attainment, household equivalised  
28  
29  
30 154 income, present illness, self-rated health, smoking, and drinking. Age was categorised as  
31  
32  
33 155 65–69, 70–74, 75–79, 80–84, and  $\geq 85$ . Based on the ages of respondents who had  
34  
35  
36 156 completed formal education, the age of final educational attainment was categorised as  $\leq$   
37  
38  
39 157 15 years, 16–18 years, and  $\geq 19$  years. Household equivalised income was classified into  
40  
41  
42 158 quintiles. Present illness was classified as ‘yes’ or ‘no’ for cancer, heart disease, and  
43  
44  
45 159 stroke. Self-rated health was dichotomised as ‘poor’ and ‘good’. Smoking and drinking  
46  
47  
48 160 were dichotomised as ‘never/past’ and ‘current’.

49  
50  
51 161

## 52 53 54 162 **Statistical analysis**

55  
56  
57 163 We analysed the ELSA and JAGES data separately because of differences in research  
58  
59  
60

1  
2  
3  
4  
5  
6 164 design, especially sampling approaches. A longitudinal weight was applied to account for  
7  
8  
9 165 survey non-response for the ELSA but not the JAGES as its design does not allow it.  
10  
11  
12 166 First, we calculated descriptive statistics. Second, we conducted a multivariate logistic  
13  
14  
15 167 regression analysis to examine the association between SII score and depressive symptom  
16  
17  
18 168 onset and obtained odds ratios (ORs) and 95% confidence intervals (CIs) for depressive  
19  
20  
21 169 symptom onset. Model 1 was not adjusted for covariates while Model 2 was adjusted for  
22  
23  
24 170 all covariates. Additionally, we analysed the association between SII sub-components and  
25  
26  
27 171 depressive symptom onset, adjusted for all covariates.

28  
29  
30 172 To mitigate potential biases resulting from missing information, we used the  
31  
32  
33 173 multiple imputation approach under the missing at random assumption. We generated 20  
34  
35  
36 174 imputed datasets for the final analysis, which excluded those who met the exclusion  
37  
38  
39 175 criteria and did not respond to the follow-up surveys, using the multiple imputation by  
40  
41  
42 176 chained equations procedure and pooled the results using Rubin's rule.[27]

43  
44  
45 177 The significance level was set at  $p < 0.05$ . We used R (Version 3.5.2 for  
46  
47  
48 178 Windows) for all statistical analyses.

49  
50  
51 179

## 52 53 54 180 **Ethics issues**

55  
56  
57 181 The ELSA investigators received ethical approval for all waves of the study from the  
58  
59  
60

1  
2  
3  
4  
5  
6 182 National Health Service Research Ethics Committees under the National Research and  
7  
8  
9 183 Ethics Services (MREC/01/2/91). The JAGES protocols were approved by the Ethics  
10  
11  
12 184 Committee on the Research of Human Subjects at Nihon Fukushi University (10-05).  
13  
14

15 185  
16

### 17 186 **Patient and public involvement**

18  
19  
20  
21 187 No patients were involved in the development of the research question, study design, or  
22  
23  
24 188 data interpretation in this study.  
25  
26

27 189  
28

### 29 30 31 **RESULTS**

32  
33 191 A total of 3,331 ELSA respondents and 33,127 JAGES respondents were included in the  
34  
35  
36 192 final analysis. Their baseline characteristics are presented in Table 1. The mean age  
37  
38  
39 193 (standard deviation) was 73.6 (6.9) years for the ELSA and 72.4 (5.4) years for the JAGES.  
40  
41  
42 194 Regarding SII scores, the ELSA had the largest number of respondents with 0 and 1 points,  
43  
44  
45 195 while the JAGES had the largest number with 2 and 3 points. In the ELSA, respondents  
46  
47  
48 196 who were older, male, less educated, had a lower income, had heart disease, had poor  
49  
50  
51 197 self-rated health, smoked, did not consume much alcohol, and had higher baseline  
52  
53  
54 198 depressive symptom scores had higher SII scores. A similar trend was observed in the  
55  
56  
57 199 JAGES, but here, those who consumed more alcohol had higher SII scores.  
58  
59  
60

200 **Table 1. Respondents' baseline characteristics**

|                                     | ELSA <sup>a</sup>                         |         |         |         |        | JAGES                                     |          |          |          |          |
|-------------------------------------|-------------------------------------------|---------|---------|---------|--------|-------------------------------------------|----------|----------|----------|----------|
|                                     | Social Isolation Index score <sup>b</sup> |         |         |         |        | Social Isolation Index score <sup>b</sup> |          |          |          |          |
|                                     | 0                                         | 1       | 2       | 3       | ≥ 4    | 0                                         | 1        | 2        | 3        | ≥ 4      |
|                                     | n = 776                                   | n = 906 | n = 525 | n = 196 | n = 47 | n = 1402                                  | n = 5981 | n = 9723 | n = 8735 | n = 2176 |
| Age (years), (%)                    |                                           |         |         |         |        |                                           |          |          |          |          |
| 65–69                               | 41.0                                      | 36.4    | 29.9    | 27.6    | 28.3   | 38.6                                      | 40.5     | 38.0     | 37.0     | 35.8     |
| 70–74                               | 26.1                                      | 28.3    | 28.8    | 29.3    | 23.6   | 32.1                                      | 32.5     | 31.6     | 31.0     | 30.4     |
| 75–79                               | 20.9                                      | 17.5    | 19.3    | 15.8    | 20.4   | 19.2                                      | 18.3     | 19.5     | 20.3     | 21.9     |
| 80–84                               | 9.1                                       | 12.2    | 12.5    | 14.5    | 15.5   | 8.3                                       | 6.7      | 8.3      | 9.0      | 8.8      |
| ≥ 85                                | 2.8                                       | 5.7     | 9.5     | 12.8    | 12.2   | 1.9                                       | 2.0      | 2.6      | 2.7      | 3.1      |
| Gender, (%)                         |                                           |         |         |         |        |                                           |          |          |          |          |
| Men                                 | 50.0                                      | 46.1    | 45.3    | 51.9    | 65.8   | 27.2                                      | 35.1     | 47.0     | 64.4     | 66.1     |
| Women                               | 50.0                                      | 53.9    | 54.7    | 48.1    | 34.2   | 72.8                                      | 64.9     | 53.0     | 35.6     | 33.9     |
| Educational attainment (years), (%) |                                           |         |         |         |        |                                           |          |          |          |          |
| ≤ 15                                | 44.1                                      | 51.3    | 52.3    | 60.9    | 69.6   | 42.9                                      | 38.1     | 37.9     | 38.7     | 48.6     |
| 16–18                               | 35.0                                      | 33.8    | 34.6    | 27.5    | 14.1   | 40.9                                      | 40.8     | 39.3     | 36.8     | 31.1     |
| ≥ 19                                | 17.8                                      | 12.5    | 11.0    | 10.3    | 14.0   | 15.7                                      | 20.4     | 21.8     | 23.3     | 18.5     |
| Missing                             | 3.2                                       | 2.4     | 2.1     | 1.3     | 2.3    | 0.5                                       | 0.7      | 0.9      | 1.2      | 1.8      |
| Household equivalised income, (%)   |                                           |         |         |         |        |                                           |          |          |          |          |
| 1st quintile (lowest)               | 11.4                                      | 18.3    | 23.2    | 31.2    | 14.4   | 7.4                                       | 10.9     | 13.9     | 15.6     | 21.3     |
| 2nd quintile                        | 21.5                                      | 23.7    | 26.1    | 24.1    | 29.6   | 13.2                                      | 13.5     | 15.0     | 15.5     | 16.4     |
| 3rd quintile                        | 20.9                                      | 21.8    | 18.9    | 19.5    | 27.1   | 22.5                                      | 30.6     | 30.3     | 30.6     | 28.0     |
| 4th quintile                        | 21.9                                      | 19.9    | 18.1    | 16.5    | 16.6   | 14.3                                      | 13.6     | 12.7     | 11.3     | 9.5      |
| 5th quintile (highest)              | 22.7                                      | 15.0    | 12.7    | 8.3     | 12.4   | 31.5                                      | 22.5     | 19.2     | 16.8     | 12.9     |
| Missing                             | 1.5                                       | 1.3     | 0.9     | 0.4     | 0.0    | 11.1                                      | 8.9      | 8.9      | 10.2     | 11.9     |
| Cancer, (%)                         |                                           |         |         |         |        |                                           |          |          |          |          |
| No                                  | 96.5                                      | 95.8    | 97.1    | 97.5    | 96.5   | 91.0                                      | 91.2     | 90.8     | 90.1     | 89.7     |
| Yes                                 | 3.4                                       | 4.2     | 2.9     | 2.5     | 3.5    | 3.2                                       | 3.1      | 3.1      | 3.4      | 3.7      |
| Missing                             | 0.1                                       | 0.0     | 0.0     | 0.0     | 0.0    | 5.8                                       | 5.7      | 6.1      | 6.5      | 6.6      |
| Heart disease, (%)                  |                                           |         |         |         |        |                                           |          |          |          |          |
| No                                  | 90.7                                      | 86.9    | 88.4    | 88.3    | 77.3   | 91.0                                      | 91.2     | 90.8     | 90.1     | 89.7     |
| Yes                                 | 9.3                                       | 13.0    | 11.6    | 11.7    | 22.7   | 3.2                                       | 3.1      | 3.1      | 3.4      | 3.7      |
| Missing                             | 0.0                                       | 0.1     | 0.0     | 0.0     | 0.0    | 5.8                                       | 5.7      | 6.1      | 6.5      | 6.6      |
| Stroke, (%)                         |                                           |         |         |         |        |                                           |          |          |          |          |



|                              |      |      |      |      |      |      |      |      |      |      |
|------------------------------|------|------|------|------|------|------|------|------|------|------|
| No                           | 96.3 | 96.1 | 97   | 94.4 | 96.6 | 93.3 | 93.6 | 93.1 | 92.5 | 92.2 |
| Yes                          | 3.7  | 3.8  | 3.0  | 5.6  | 3.4  | 0.9  | 0.8  | 0.8  | 1.0  | 1.2  |
| Missing                      | 0    | 0.1  | 0.0  | 0.0  | 0.0  | 5.8  | 5.7  | 6.1  | 6.5  | 6.6  |
| Self-rated health, (%)       |      |      |      |      |      |      |      |      |      |      |
| Good                         | 86.4 | 79.9 | 78.8 | 75.4 | 71.3 | 92.0 | 91.7 | 90.6 | 90.2 | 87.2 |
| Poor                         | 13.6 | 20.1 | 21.2 | 24.6 | 28.7 | 7.2  | 7.7  | 8.6  | 9.0  | 12.2 |
| Missing                      | 0.0  | 0.0  | 0.0  | 0.0  | 0.0  | 0.8  | 0.5  | 0.8  | 0.8  | 0.6  |
| Smoking, (%)                 |      |      |      |      |      |      |      |      |      |      |
| Never/past                   | 95.5 | 93.1 | 89.8 | 82.9 | 89.4 | 86.4 | 86.1 | 82.9 | 81.5 | 78.4 |
| Current                      | 4.5  | 6.9  | 10.2 | 17.1 | 10.6 | 6.4  | 7.4  | 9.5  | 11.3 | 14.2 |
| Missing                      | 0.0  | 0.0  | 0.0  | 0.0  | 0.0  | 7.1  | 6.5  | 7.5  | 7.2  | 7.3  |
| Drinking, (%)                |      |      |      |      |      |      |      |      |      |      |
| Never/past                   | 7.5  | 11.8 | 14.9 | 25.8 | 17.3 | 65.0 | 60.0 | 56.5 | 50.4 | 55.0 |
| Current                      | 91.3 | 87.0 | 82.9 | 72.6 | 73.6 | 30.2 | 35.7 | 38.6 | 44.7 | 40.4 |
| Missing                      | 1.3  | 1.2  | 2.2  | 1.6  | 9.2  | 4.8  | 4.3  | 4.9  | 4.9  | 4.6  |
| CES-D score at baseline, (%) |      |      |      |      |      |      |      |      |      |      |
| 0                            | 57.2 | 52.0 | 45.5 | 42.2 | 54.0 |      |      |      |      |      |
| 1                            | 27.3 | 26.2 | 28.6 | 31.8 | 25.5 |      |      |      |      |      |
| 2                            | 9.8  | 13.8 | 17.1 | 11.9 | 15.1 |      |      |      |      |      |
| 3                            | 5.7  | 8.0  | 8.8  | 14.2 | 5.4  |      |      |      |      |      |
| GDS score at baseline, (%)   |      |      |      |      |      |      |      |      |      |      |
| 0                            |      |      |      |      |      | 20.5 | 30.4 | 29.0 | 26.4 | 24.3 |
| 1                            |      |      |      |      |      | 25.5 | 28.4 | 28.6 | 26.9 | 27.0 |
| 2                            |      |      |      |      |      | 22.5 | 20.0 | 19.8 | 21.5 | 21.1 |
| 3                            |      |      |      |      |      | 17.5 | 13.1 | 13.5 | 14.7 | 15.9 |
| 4                            |      |      |      |      |      | 14.1 | 8.1  | 9.1  | 10.5 | 11.7 |

201 ELSA, English Longitudinal Study of Ageing; JAGES, Japan Gerontological Evaluation  
 202 Study; CES-D, Center for Epidemiologic Studies Depression Scale; GDS, Geriatric  
 203 Depression Scale

204 <sup>a</sup> ELSA data after sampling weight

205 <sup>b</sup> Missing data: ELSA, n = 468; JAGES, n = 5,110

1  
2  
3  
4  
5  
6  
7 206 Table 2 presents the description of social isolation and depressive symptom onset.  
8  
9 207 At follow-up, 190 (6.5%) ELSA respondents and 4,456 (13.5%) JAGES respondents  
10  
11  
12 208 exhibited depressive symptom onset. In both studies, higher SII scores were associated  
13  
14  
15 209 with an increased risk of depressive symptom onset. Regarding SII sub-components,  
16  
17  
18 210 ELSA respondents who were unmarried or living alone were more likely to have  
19  
20  
21 211 depressive symptoms, while this was the case with JAGES respondents with no social  
22  
23  
24 212 participation.  
25  
26  
27  
28  
29  
30  
31  
32  
33  
34  
35  
36  
37  
38  
39  
40  
41  
42  
43  
44  
45  
46  
47  
48  
49  
50  
51  
52  
53  
54  
55  
56  
57  
58  
59  
60

213 **Table 2. Description of social isolation status and depressive symptom onset**

|                                 |         | ELSA <sup>a</sup>        |         | JAGES                  |          |
|---------------------------------|---------|--------------------------|---------|------------------------|----------|
|                                 |         | CES-D score at follow-up |         | GDS score at follow-up |          |
|                                 |         | < 4                      | ≥ 4     | < 5                    | ≥ 5      |
|                                 |         | n = 2728                 | n = 190 | n = 28671              | n = 4456 |
| Social Isolation Index score,   |         |                          |         |                        |          |
| (%)                             |         |                          |         |                        |          |
| 0                               |         | 27.5                     | 13.5    | 4.4                    | 3.0      |
| 1                               |         | 31.2                     | 29.3    | 18.6                   | 14.3     |
| 2                               |         | 17.9                     | 18.9    | 29.8                   | 26.3     |
| 3                               |         | 6.5                      | 10.1    | 26.2                   | 27.5     |
| ≥ 4                             |         | 1.5                      | 2.9     | 6.1                    | 9.3      |
| Missing                         |         | 15.4                     | 25.3    | 14.8                   | 19.7     |
| Social Isolation Index sub-     |         |                          |         |                        |          |
| components, (%)                 |         |                          |         |                        |          |
| Unmarried or living alone       | No      | 71.9                     | 58.5    | 88.3                   | 85.2     |
|                                 | Yes     | 28.1                     | 41.5    | 10.2                   | 12.7     |
|                                 | Missing | 0.0                      | 0.0     | 1.4                    | 2.1      |
| Poor interaction with children  | No      | 81.8                     | 73.4    | 26.6                   | 25.0     |
|                                 | Yes     | 12.5                     | 14.7    | 71.7                   | 72.9     |
|                                 | Missing | 5.7                      | 11.8    | 1.7                    | 2.1      |
| Poor interaction with relatives | No      | 76.3                     | 68.1    | 41.1                   | 38.7     |
|                                 | Yes     | 17.3                     | 18.6    | 54.4                   | 56.0     |
|                                 | Missing | 6.4                      | 13.4    | 4.5                    | 5.4      |
| Poor interaction with friends   | No      | 72.2                     | 66.0    | 37.1                   | 31.2     |
|                                 | Yes     | 18.4                     | 21.6    | 58.2                   | 63.8     |
|                                 | Missing | 9.4                      | 12.4    | 4.6                    | 5.0      |
| No social participation         | No      | 61.7                     | 46.3    | 75.0                   | 63.9     |
|                                 | Yes     | 28.4                     | 32.5    | 13.0                   | 20.0     |
|                                 | Missing | 10.0                     | 21.2    | 11.7                   | 16.1     |

214 ELSA, English Longitudinal Study of Ageing; JAGES, Japan Gerontological Evaluation

215 Study; CES-D, Center for Epidemiologic Studies Depression Scale; GDS, Geriatric

216 Depression Scale

217 <sup>a</sup> ELSA data after sampling weight

1  
2  
3  
4  
5  
6  
7 218 Table 3 depicts the association between SII scores and depressive symptom onset.  
8  
9 219 Multivariable analysis showed that higher SII scores were associated with a higher risk  
10  
11  
12 220 of depressive symptom onset in both studies after adjusting for all covariates. In the ELSA,  
13  
14  
15 221 the OR of depressive symptom onset was significantly higher from a score  $\geq$  one point  
16  
17  
18 222 (OR [95% CI] compared with zero points, one: 1.68 [1.02–2.75], two: 1.77 [1.03–3.05],  
19  
20  
21 223 three: 2.64 [1.37–5.12],  $\geq$  four: 4.01 [1.43–11.22],  $p$  for trend = 0.015). In the JAGES, as  
22  
23  
24 224 SII scores increased, the OR of depressive symptom onset gradually increased, reaching  
25  
26  
27 225 significance at  $\geq$  three points (OR [95% CI] compared with zero points, one: 1.10 [0.89–  
28  
29  
30 226 1.35], two: 1.15 [0.94–1.40], three: 1.28 [1.04–1.56],  $\geq$  four: 1.48 [1.18–1.85],  $p$  for trend  
31  
32  
33 227  $< 0.001$ ). These results showed almost the same tendency as the complete case analysis  
34  
35  
36 228 without multiple imputation (Supplementary Table 1).  
37  
38  
39  
40  
41  
42  
43  
44  
45  
46  
47  
48  
49  
50  
51  
52  
53  
54  
55  
56  
57  
58  
59  
60

229 **Table 3. Association between social isolation and depressive symptom onset: multivariable logistic regression analysis**

|                              | ELSA                       |                                   | JAGES                      |                                   |
|------------------------------|----------------------------|-----------------------------------|----------------------------|-----------------------------------|
|                              | Crude OR (95% CI)          | Adjusted OR (95% CI) <sup>a</sup> | Crude OR (95% CI)          | Adjusted OR (95% CI) <sup>a</sup> |
| Social Isolation Index score |                            |                                   |                            |                                   |
| 0                            | 1.00 (reference)           | 1.00 (reference)                  | 1.00 (reference)           | 1.00 (reference)                  |
| 1                            | 1.92** (1.19–3.10)         | 1.68* (1.02–2.75)                 | 1.14 (0.94–1.39)           | 1.10 (0.89–1.35)                  |
| 2                            | 2.15** (1.28–3.62)         | 1.77* (1.03–3.05)                 | 1.32** (1.09–1.60)         | 1.15 (0.94–1.40)                  |
| 3                            | 3.19*** (1.73–5.90)        | 2.64** (1.37–5.12)                | 1.57*** (1.30–1.90)        | 1.28* (1.04–1.56)                 |
| ≥ 4                          | 3.85** (1.46–10.18)        | 4.01** (1.43–11.22)               | 2.26*** (1.83–2.79)        | 1.48*** (1.18–1.85)               |
|                              | <i>p</i> for trend < 0.001 | <i>p</i> for trend = 0.015        | <i>p</i> for trend < 0.001 | <i>p</i> for trend < 0.001        |

230 \* *p* < 0.05; \*\* *p* < 0.01; \*\*\* *p* < 0.001

231 ELSA, English Longitudinal Study of Ageing; JAGES, Japan Gerontological Evaluation Study; CI, confidence interval; OR, odds ratio

232 <sup>a</sup> Adjusted for age, gender, educational attainment, household equivalised income, present illness (cancer, heart disease, and stroke), self-rated health, smoking, drinking, and depression score at baseline (Center for Epidemiologic Studies Depression Scale for the ELSA and Geriatric Depression Scale for the JAGES).

1  
2  
3  
4  
5  
6 235 Table 4 presents the impacts of SII sub-components on depressive symptom  
7  
8  
9 236 onset. In the ELSA, sub-components were not significant, although poor interaction with  
10  
11  
12 237 children was marginally significant (OR [95% CI], with ‘none’ as the reference;  
13  
14  
15 238 unmarried or living alone: 1.13 [0.80–1.60], poor interaction with children: 1.55 [1.00–  
16  
17  
18 239 2.41], poor interaction with relatives: 1.24 [0.79–1.94], poor interaction with friends: 1.15  
19  
20  
21 240 [0.77–1.71], no social participation: 1.22 [0.80–1.87]). In the JAGES, poor interaction  
22  
23  
24 241 with children and no social participation were significantly associated with depressive  
25  
26  
27 242 symptom onset after adjusting for all covariates (OR [95% CI], with ‘none’ as the  
28  
29  
30 243 reference; unmarried or living alone: 1.11 [1.00–1.24], poor interaction with children:  
31  
32  
33 244 1.09 [1.01–1.19], poor interaction with relatives: 1.04 [0.96–1.12], poor interaction with  
34  
35  
36 245 friends: 1.03 [0.95–1.11], no social participation: 1.28 [1.17–1.40]). These results were  
37  
38  
39 246 similar to those obtained from the complete case analysis (Supplementary Table 2).  
40  
41  
42  
43  
44  
45  
46  
47  
48  
49  
50  
51  
52  
53  
54  
55  
56  
57  
58  
59  
60

1  
2  
3  
4 247 **Table 4. Association between sub-components of social isolation and depressive symptom onset: multivariable logistic regression**  
5  
6 248 **analysis**

|                                                         | ELSA                              | JAGES                             |
|---------------------------------------------------------|-----------------------------------|-----------------------------------|
|                                                         | Adjusted OR (95% CI) <sup>a</sup> | Adjusted OR (95% CI) <sup>a</sup> |
| Social Isolation Index sub-components (reference: none) |                                   |                                   |
| Unmarried or living alone                               | 1.13 (0.80–1.60)                  | 1.11 <sup>†</sup> (1.00–1.24)     |
| Poor interaction with children                          | 1.55 <sup>†</sup> (1.00–2.41)     | 1.09* (1.01–1.19)                 |
| Poor interaction with relatives                         | 1.24 (0.79–1.94)                  | 1.04 (0.96–1.12)                  |
| Poor interaction with friends                           | 1.15 (0.77–1.71)                  | 1.03 (0.95–1.11)                  |
| No social participation                                 | 1.22 (0.80–1.87)                  | 1.28*** (1.17–1.40)               |

7  
8  
9  
10  
11  
12  
13  
14  
15  
16  
17  
18  
19  
20 249 \*  $p < 0.05$ ; \*\*  $p < 0.01$ ; \*\*\*  $p < 0.001$ ; <sup>†</sup>  $p < 0.1$   
21  
22 250 ELSA, English Longitudinal Study of Ageing; JAGES, Japan Gerontological Evaluation Study; CI, confidence interval; OR, odds ratio  
23  
24 251 <sup>a</sup> Adjusted for age, gender, educational attainment, equivalent income, present illness (cancer, heart disease, and stroke), self-rated health,  
25 252 smoking, drinking, and depression score at baseline (Center for Epidemiologic Studies Depression Scale for the ELSA and Geriatric  
26 253 Depression Scale for the JAGES).

1  
2  
3  
4  
5  
6 254 **DISCUSSION**  
7  
8

9 255 To the best of our knowledge, this is the first cross-national longitudinal study of the  
10  
11  
12 256 association of social isolation with depressive symptoms among older English and  
13  
14  
15 257 Japanese adults. Social isolation was significantly associated with depressive symptom  
16  
17  
18 258 onset in both countries. Our results support previous longitudinal findings on social  
19  
20  
21 259 relationships and mental health in older adults in England[28] and Japan.[29] Using data  
22  
23  
24 260 frames that were similar with regard to assessment and covariates, we showed that social  
25  
26  
27 261 isolation is a common risk factor for depressive symptoms in England and Japan despite  
28  
29  
30 262 cultural differences such as emphasis on friendships versus familism, respectively. Thus,  
31  
32  
33 263 our results suggest that to safeguard the mental health of older adults, addressing social  
34  
35  
36 264 isolation is a global need.

37  
38  
39 265 The association between social isolation and depressive symptoms was  
40  
41  
42 266 somewhat stronger in England than in Japan. Although we cannot make direct  
43  
44  
45 267 comparisons because of variations in cohort follow-up periods and depressive symptom  
46  
47  
48 268 measurement, there are several possible reasons for this pattern of findings. The impact  
49  
50  
51 269 of social factors could be different depending on the group and society to which one  
52  
53  
54 270 belongs. This is best understood in the context of the concept of relative deprivation.[30]  
55  
56  
57 271 In other words, higher levels of relative social isolation may induce greater psychological  
58  
59  
60



1  
2  
3  
4  
5  
6 272 stress. A previous study showed that rich community ties and cohesion were protective  
7  
8  
9 273 factors for health but could have a negative effect on those who were not socially  
10  
11  
12 274 involved.[31] Being isolated in a connected society such as England may represent a more  
13  
14  
15 275 severe condition, which may have a stronger negative impact on mental health.  
16  
17

18 276 While a previous study showed that friendship-based relationships contributed  
19  
20  
21 277 to longevity in older adults in England, in the present study they were not associated with  
22  
23  
24 278 depressive symptom onset. Another study focused on English older adults indicated the  
25  
26  
27 279 contribution of partner and child support, rather than support from friends, in alleviating  
28  
29  
30 280 depression;[32] thus, relationships with family members might be important for mental  
31  
32  
33 281 health. In the JAGES, poor interaction with children and no social participation were  
34  
35  
36 282 significantly associated with depressive symptom onset. Previous studies on older  
37  
38  
39 283 Japanese adults suggested that interaction with children and social participation were  
40  
41  
42 284 protective factors for mental health problems.[12, 33] Traditionally, Japan has had strong  
43  
44  
45 285 family and kinship ties, and adult children are expected to demonstrate reciprocity with  
46  
47  
48 286 their parents.[14] However, children now tend to live apart from their parents after  
49  
50  
51 287 marriage, and contact is reduced,[34] potentially leading to loneliness in older adults. In  
52  
53  
54 288 such a situation, social participation may improve mental health by establishing a sense  
55  
56  
57 289 of belonging.[33] Our results demonstrate that promoting interaction with children and  
58  
59  
60

1  
2  
3  
4  
5  
6 290 community participation are essential for safeguarding mental health in older Japanese  
7  
8  
9 291 adults.

10  
11  
12 292 This study has several strengths. First, it is the first cross-national population-  
13  
14  
15 293 level investigation of the impact of social isolation on depressive symptom onset using a  
16  
17  
18 294 unified data frame. Second, by using two longitudinal datasets, we were able to determine  
19  
20  
21 295 causality in the association between social isolation and depressive symptoms. Third, the  
22  
23  
24 296 use of large-scale data allowed us to detect the effects of relatively rare situations of  
25  
26  
27 297 severe social isolation.

28  
29  
30 298 However, certain limitations cannot be ignored. First, the measurement of  
31  
32  
33 299 depressive symptoms in the two cohorts was not the same. Therefore, we could not  
34  
35  
36 300 directly compare depressive symptom onset in the two countries. However, these  
37  
38  
39 301 measurements were also used in a previous cross-national comparison study in England  
40  
41  
42 302 and Japan,[23] and we were able to examine the association between social isolation and  
43  
44  
45 303 depressive symptom onset in each country using the same data frame. Second, we  
46  
47  
48 304 substituted social support for the assessment of social contact for some items in order to  
49  
50  
51 305 use the same SII. Therefore, cultural differences in expectations regarding the receipt of  
52  
53  
54 306 social support in both countries might have caused information biases. For instance,  
55  
56  
57 307 expectations regarding social support from relatives could originally have been higher in  
58  
59  
60

1  
2  
3  
4  
5  
6 308 Japan,[14] leading to overestimation of social isolation levels. Third, there were  
7  
8  
9 309 differences in study design in the data from the two cohorts, such as sampling method  
10  
11  
12 310 and follow-up period. However, we made efforts to harmonise the data: those aged  $\leq 64$ ,  
13  
14  
15 311 with dementia, and dependent in activities of daily living were excluded from the analysis.  
16  
17  
18 312 Also, the ELSA presents nationally representative population data, while the JAGES does  
19  
20  
21 313 not. However, the JAGES sample is representative of areas from a nationwide ageing  
22  
23  
24 314 study in which about one-fifth of all prefectures (nine out of 47) were enrolled.  
25  
26  
27  
28  
29

315

## 316 **CONCLUSION**

317 We examined the association between social isolation and depressive symptom onset  
318 among older adults in England and Japan, which have different cultural contexts  
319 regarding social relationships, finding a significant association in both countries. Thus,  
320 globally, tackling social isolation must be prioritised to safeguard the mental health of  
321 older adults. Particularly in Japan, the promotion of interaction with children and social  
322 participation could be key factors in addressing social isolation.

323

## 324 **ACKNOWLEDGEMENTS**

325 We wish to express our deepest gratitude to the members in the Japan Gerontological

1  
2  
3  
4  
5  
6  
7 326 Evaluation Study. We would also like to thank everyone who participated in the surveys.  
8

9 327

10  
11  
12 328 **AUTHORS' CONTRIBUTIONS**  
13

14  
15 329 All authors contributed to the conception and design of this study. Data collection was

16  
17  
18 330 primarily conducted by MS, JA, NC, KO, and KK. Analyses were performed by TN, MS,

19  
20  
21 331 JA, TT, SK, and TI. TN prepared the initial manuscript and MS, JA, NC, TT, SK, TI, KO,

22  
23  
24 332 and KK significantly contributed to revising it. All authors read and approved the final

25  
26  
27 333 manuscript.  
28

29  
30 334

31  
32  
33 335 **FUNDING STATEMENT**  
34

35  
36 336 This work was supported by a grant from the Grants-in-Aid for Scientific Research

37  
38  
39 337 (18KK0057, 19K24277) from the Japan Society for the Promotion of Science. The

40  
41  
42 338 English Longitudinal Study of Ageing was developed by a team of researchers based at

43  
44  
45 339 the University College London, NatCen Social Research, and the Institute for Fiscal

46  
47  
48 340 Studies. The data were collected by NatCen Social Research. The funding is currently

49  
50  
51 341 provided by the National Institute of Aging (R01AG017644) and a consortium of UK

52  
53  
54 342 government departments coordinated by the National Institute for Health Research. The

55  
56  
57 343 Japan Gerontological Evaluation Study is supported by the Ministry of Education, Culture,  
58  
59  
60

1  
2  
3  
4  
5  
6 344 Sports, Science and Technology-Japan-Supported Program for the Strategic Research  
7  
8  
9 345 Foundation at Private Universities (2009-2013), Japan Society for the Promotion of  
10  
11  
12 346 Science KAKENHI Grant Numbers (JP18390200, JP22330172, JP22390400,  
13  
14  
15 347 JP23243070, JP23590786, JP23790710, JP24390469, JP24530698, JP24683018,  
16  
17  
18 348 JP25253052, JP25870573, JP25870881, JP26285138, JP26882010, JP15H01972),  
19  
20  
21 349 Health Labour Sciences Research Grants (H22-Choju-Shitei-008, H24-Junkanki -Ippan-  
22  
23  
24 350 007, H24-Chikyukibo-Ippan-009, H24-Choju-Wakate-009, H25-Kenki-Wakate-015,  
25  
26  
27 351 H25-Choju-Ippan-003, H26-Irryo-Shitei-003 [Fukkou], H26-Choju-Ippan-006, H27-  
28  
29  
30 352 Ninchisyuu-Ippan-001, H28-chojuIppan-002, H28-Ninchisho-Ippan-002, H30-Kenki-  
31  
32  
33 353 Ippan-006, H30-Junkankitou-Ippan-004), Japan Agency for Medical Research and  
34  
35  
36 354 Development (JP17dk0110017, JP18dk0110027, JP18ls0110002, JP18le0110009,  
37  
38  
39 355 JP19dk0110034), Research Funding for Longevity Sciences from the National Center for  
40  
41  
42 356 Geriatrics and Gerontology (24-17, 24-23, 29-42, 30-22, 20-40), Open Innovation  
43  
44  
45 357 Platform with Enterprises, and Research Institute and Academia (OPERA, JPMJOP1831)  
46  
47  
48 358 from the Japan Science and Technology Agency. The funding sources had no role in the  
49  
50  
51 359 study design, data collection and analysis, decision to publish or preparation of the  
52  
53  
54 360 manuscript.  
55  
56  
57 361  
58  
59  
60

1  
2  
3  
4  
5  
6 362 **DATA SHARING STATEMENT**  
7

8  
9 363 For the JAGES, all enquiries are to be addressed to the data management committee via  
10  
11  
12 364 e-mail: [dataadmin.ml@jages.net](mailto:dataadmin.ml@jages.net). All JAGES datasets have ethical or legal restrictions for  
13  
14  
15 365 public deposition because of the inclusion of sensitive information about the human  
16  
17  
18 366 participants. Regarding the ELSA, data are available in an open-access repository at  
19  
20  
21 367 <http://www.dataarchive.ac.uk/>.  
22

23  
24 368

25  
26  
27 369 **COMPETING INTERESTS STATEMENT**  
28

29  
30 370 The authors declare no conflict of interest.  
31

32  
33 371

34  
35  
36 372 **REFERENCES**  
37

- 38  
39 373 1. Townsend P. The family life of old people: an investigation in East London. *Sociol Rev*  
40  
41  
42 374 1955;3:175–95. doi: 10.1111/j.1467-954X.1955.tb01052.x  
43  
44  
45 375 2. Holt-Lunstad J, Smith TB, Layton JB. Social relationships and mortality risk: a meta-  
46  
47  
48 376 analytic review. *PLoS Med* 2010;7:e1000316. doi:10.1371/journal.pmed.1000316  
49  
50  
51 377 3. Valtorta NK, Kanaan M, Gilbody S, et al. Loneliness and social isolation as risk factors  
52  
53  
54 378 for coronary heart disease and stroke: systematic review and meta-analysis of  
55  
56  
57 379 longitudinal observational studies. *Heart* 2016;102:1009–16.  
58  
59  
60

- 1  
2  
3  
4  
5  
6 380 doi:10.1136/heartjnl-2015-308790  
7  
8  
9 381 4. Livingston G, Sommerlad A, Orgeta V, et al. Dementia prevention, intervention, and  
10  
11  
12 382 care. *Lancet* 2017;390:2673–734. doi:10.1016/s0140-6736(17)31363-6  
13  
14  
15 383 5. Leigh-Hunt N, Bagguley D, Bash K, et al. An overview of systematic reviews on the  
16  
17  
18 384 public health consequences of social isolation and loneliness. *Public Health*  
19  
20  
21 385 2017;152:157–71. doi:10.1016/j.puhe.2017.07.035  
22  
23  
24 386 6. Santini ZI, Koyanagi A, Tyrovolas S, et al. The association between social relationships  
25  
26  
27 387 and depression: a systematic review. *J Affect Disord* 2015;175:53–65.  
28  
29  
30 388 doi:10.1016/j.jad.2014.12.049  
31  
32  
33 389 7. Kawachi I, Berkman LF. Social ties and mental health. *J Urban Health* 2001;78:458–  
34  
35  
36 390 67. doi:10.1093/jurban/78.3.458  
37  
38  
39 391 8. Sivertsen H, Bjorklof GH, Engedal K, et al. Depression and quality of life in older  
40  
41  
42 392 persons: a review. *Dement Geriatr Cogn Disord* 2015;40:311–39.  
43  
44  
45 393 doi:10.1159/000437299  
46  
47  
48 394 9. Chen CM, Mullan J, Su YY, et al. The longitudinal relationship between depressive  
49  
50  
51 395 symptoms and disability for older adults: a population-based study. *J Gerontol A*  
52  
53  
54 396 *Biol Sci Med Sci* 2012;67:1059–67. doi:10.1093/gerona/gls074  
55  
56  
57 397 10. World Federation for Mental Health. Depression: a global crisis. World Mental Health  
58  
59  
60

- 398 Day, October 10 2012. 2012.
- 399 [https://www.who.int/mental\\_health/management/depression/wfmh\\_paper\\_depre](https://www.who.int/mental_health/management/depression/wfmh_paper_depre)
- 400 [ssion\\_wmhd\\_2012.pdf](https://www.who.int/mental_health/management/depression/wfmh_paper_depression_wmhd_2012.pdf) (accessed 7 Feb 2020).
- 401 11. Aida J, Cable N, Zaninotto P, et al. Social and behavioural determinants of the
- 402 difference in survival among older adults in Japan and England. *Gerontology*
- 403 2018;64:266–77. doi:10.1159/000485797
- 404 12. Sugisawa H, Shibata H, Hougham GW, et al. The impact of social ties on depressive
- 405 symptoms in U.S. and Japanese elderly. *J Soc Issues* 2003;58:785–804.
- 406 doi:10.1111/1540-4560.00290
- 407 13. Takagi E, Silverstein M. Intergenerational coresidence of the Japanese elderly: are
- 408 cultural norms proactive or reactive? 2006;28:473–92.
- 409 doi:10.1177/0164027506287788
- 410 14. Brown JW, Liang J, Krause N, et al. Transitions in living arrangements among elders
- 411 in Japan: does health make a difference? *J Gerontol B Psychol Sci Soc Sci*
- 412 2002;57:S209–20. doi:10.1093/geronb/57.4.s209
- 413 15. HM Government. A connected society: a strategy for tackling loneliness – laying the
- 414 foundations for change. 2018.
- 415 <https://assets.publishing.service.gov.uk/government/uploads/system/uploads/atta>



- 1  
2  
3  
4  
5  
6 416 [chment\\_data/file/750909/6.4882\\_DCMS\\_Loneliness\\_Strategy\\_web\\_Update.pdf](#)  
7  
8  
9 417 (accessed 12 October 2020).  
10  
11  
12 418 16. National Institute of Population and Social Security Research. Household projections  
13  
14  
15 419 for Japan. [http://www.ipss.go.jp/pp-ajsetai/e/hprj\\_98/hprj\\_98.html](http://www.ipss.go.jp/pp-ajsetai/e/hprj_98/hprj_98.html) (accessed 12  
16  
17  
18 420 October 2020).  
19  
20  
21 421 17. Murayama H, Shibui Y, Fukuda Y, et al. A new crisis in Japan-social isolation in old  
22  
23  
24 422 age. *J Am Geriatr Soc* 2011;59:2160–2. doi:10.1111/j.1532-5415.2011.03640.x  
25  
26  
27 423 18. Organisation for Economic Co-operation and Development. Society at a Glance:  
28  
29  
30 424 OECD Social Indicators. Paris: OECD Publishing 2005.  
31  
32  
33 425 19. Santini ZI, Jose PE, York Cornwell E, et al. Social disconnectedness, perceived  
34  
35  
36 426 isolation, and symptoms of depression and anxiety among older Americans  
37  
38  
39 427 (NSHAP): a longitudinal mediation analysis. *Lancet Public Health* 2020;5:e62–  
40  
41  
42 428 70. doi:10.1016/s2468-2667(19)30230-0  
43  
44  
45 429 20. Mossialos E, Djordjevic A, Osborn R, et al. International profiles of health care  
46  
47  
48 430 systems. 2017.  
49  
50  
51 431 [https://www.commonwealthfund.org/sites/default/files/documents/\\_\\_\\_media\\_fil](https://www.commonwealthfund.org/sites/default/files/documents/___media_files_publications_fund_report_2017_may_mossialos_intl_profiles_v5.pdf)  
52  
53  
54 432 [es\\_publications\\_fund\\_report\\_2017\\_may\\_mossialos\\_intl\\_profiles\\_v5.pdf](#)  
55  
56  
57 433 (accessed 12 October 2020).  
58  
59  
60

- 1  
2  
3  
4  
5  
6 434 21. Kondo K. Progress in aging epidemiology in Japan: the JAGES Project. *J Epidemiol*  
7  
8  
9 435 2016;26:331–6. doi:10.2188/jea.JE20160093  
10  
11  
12 436 22. Zhao Y, Hu Y, Smith JP, et al. Cohort profile: the China Health and Retirement  
13  
14  
15 437 Longitudinal Study (CHARLS). *Int J Epidemiol* 2014;43:61–8.  
16  
17  
18 438 doi:10.1093/ije/dys203  
19  
20  
21 439 23. Cable N, Chandola T, Aida J, et al. Can sleep disturbance influence changes in mental  
22  
23  
24 440 health status? Longitudinal research evidence from ageing studies in England and  
25  
26  
27 441 Japan. *Sleep Med* 2017;30:216–21. doi:10.1016/j.sleep.2016.11.017  
28  
29  
30 442 24. Gallagher D, Kiss A, Lanctot K, et al. Depressive symptoms and cognitive decline: a  
31  
32  
33 443 longitudinal analysis of potentially modifiable risk factors in community dwelling  
34  
35  
36 444 older adults. *J Affect Disord* 2016;190:235–40. doi:10.1016/j.jad.2015.09.046  
37  
38  
39 445 25. Burke WJ, Roccaforte WH, Wengel SP. The short form of the Geriatric Depression  
40  
41  
42 446 Scale: a comparison with the 30-item form. *J Geriatr Psychiatry Neurol*  
43  
44  
45 447 1991;4:173–8. doi:10.1177/089198879100400310  
46  
47  
48 448 26. Shankar A, McMunn A, Banks J, et al. Loneliness, social isolation, and behavioral  
49  
50  
51 449 and biological health indicators in older adults. *Health Psychol* 2011;30:377–85.  
52  
53  
54 450 doi:10.1037/a0022826  
55  
56  
57 451 27. White IR, Royston P, Wood AM. Multiple imputation using chained equations: issues  
58  
59  
60

- 1  
2  
3  
4  
5  
6 452 and guidance for practice. *Stat Med* 2011;30:377–99. doi:10.1002/sim.4067  
7  
8  
9 453 28. Cruwys T, Dingle GA, Haslam C, et al. Social group memberships protect against  
10  
11  
12 454 future depression, alleviate depression symptoms and prevent depression relapse.  
13  
14  
15 455 *Soc Sci Med* 2013;98:179–86. doi:10.1016/j.socscimed.2013.09.013  
16  
17  
18 456 29. Koizumi Y, Awata S, Kuriyama S, et al. Association between social support and  
19  
20  
21 457 depression status in the elderly: results of a 1-year community-based prospective  
22  
23  
24 458 cohort study in Japan. *Psychiatry Clin Neurosci* 2005;59:563–9.  
25  
26  
27 459 doi:10.1111/j.1440-1819.2005.01415.x  
28  
29  
30 460 30. Smith HJ, Pettigrew TF, Pippin GM, et al. Relative deprivation: a theoretical and  
31  
32  
33 461 meta-analytic review. *Pers Soc Psychol Rev* 2012;16:203–32.  
34  
35  
36 462 doi:10.1177/1088868311430825  
37  
38  
39 463 31. Amemiya A, Saito J, Saito M, et al. Social capital and the improvement in functional  
40  
41  
42 464 ability among older people in Japan: a multilevel survival analysis using JAGES  
43  
44  
45 465 data. *Int J Environ Res Public Health* 2019;16:1310. doi:10.3390/ijerph16081310  
46  
47  
48 466 32. Stafford M, McMunn A, Zaninotto P, et al. Positive and negative exchanges in social  
49  
50  
51 467 relationships as predictors of depression: evidence from the English Longitudinal  
52  
53  
54 468 Study of Aging. *J Aging Health* 2011;23:607–28.  
55  
56  
57 469 doi:10.1177/0898264310392992  
58  
59  
60

- 1  
2  
3  
4  
5  
6 470 33. Takagi D, Kondo K, Kawachi I. Social participation and mental health: moderating  
7  
8  
9 471 effects of gender, social role and rurality. *BMC Public Health* 2013;13:701.  
10  
11  
12 472 doi:10.1186/1471-2458-13-701  
13  
14  
15 473 34. Takagi E, Silverstein M. Purchasing piety? Coresidence of married children with their  
16  
17  
18 474 older parents in Japan. *Demography* 2011;48:1559–79. doi:10.1007/s13524-011-  
19  
20  
21 475 0053-0  
22  
23  
24 476  
25  
26  
27  
28  
29  
30  
31  
32  
33  
34  
35  
36  
37  
38  
39  
40  
41  
42  
43  
44  
45  
46  
47  
48  
49  
50  
51  
52  
53  
54  
55  
56  
57  
58  
59  
60

**Supplementary Table 1. Association between social isolation and depressive symptom onset, by complete case analysis**

|                                |                        | ELSA                       |                               | JAGES                      |                            |
|--------------------------------|------------------------|----------------------------|-------------------------------|----------------------------|----------------------------|
|                                |                        | Crude OR (95% CI)          | Adjusted OR (95% CI)          | Crude OR (95% CI)          | Adjusted OR (95% CI)       |
| Social Isolation Index score   | 0                      | 1.00 (reference)           | 1.00 (reference)              | 1.00 (reference)           | 1.00 (reference)           |
|                                | 1                      | 1.92** (1.19–3.10)         | 1.56 <sup>†</sup> (0.94–2.60) | 1.14 (0.94–1.39)           | 1.11 (0.87–1.41)           |
|                                | 2                      | 2.15** (1.28–3.62)         | 1.71 <sup>†</sup> (0.98–2.99) | 1.32** (1.09–1.60)         | 1.20 (0.95–1.51)           |
|                                | 3                      | 3.19*** (1.73–5.90)        | 2.50** (1.27–4.90)            | 1.57*** (1.30–1.90)        | 1.30* (1.03–1.64)          |
|                                | ≥ 4                    | 3.85** (1.46–10.18)        | 5.17** (1.83–14.66)           | 2.26*** (1.83–2.79)        | 1.47** (1.13–1.91)         |
|                                |                        | <i>p</i> for trend < 0.001 | <i>p</i> for trend < 0.001    | <i>p</i> for trend < 0.001 | <i>p</i> for trend < 0.001 |
| Age (years)                    | 65–69                  |                            | 1.00 (reference)              |                            | 1.00 (reference)           |
|                                | 70–74                  |                            | 1.37 (0.83–2.25)              |                            | 1.16** (1.05–1.30)         |
|                                | 75–79                  |                            | 1.24 (0.71–2.14)              |                            | 1.31*** (1.16–1.48)        |
|                                | 80–84                  |                            | 1.66 <sup>†</sup> (0.92–2.99) |                            | 1.60*** (1.37–1.88)        |
|                                | ≥ 85                   |                            | 0.97 (0.45–2.09)              |                            | 1.79*** (1.39–2.30)        |
| Gender                         | Male                   |                            | 1.00 (reference)              |                            | 1.00 (reference)           |
|                                | Female                 |                            | 1.58* (1.07–2.34)             |                            | 1.00 (0.90–1.11)           |
| Educational attainment (years) | < 15                   |                            | 1.00 (reference)              |                            | 1.00 (reference)           |
|                                | 16–18                  |                            | 1.05 (0.68–1.60)              |                            | 0.81*** (0.74–0.89)        |
|                                | ≥ 19                   |                            | 1.30 (0.70–2.41)              |                            | 0.68*** (0.60–0.78)        |
| Household equivalised income   | 1st quintile (lowest)  |                            | 1.00 (reference)              |                            | 1.00 (reference)           |
|                                | 2nd quintile           |                            | 0.70 (0.40–0.21)              |                            | 0.95 (0.83–1.09)           |
|                                | 3rd quintile           |                            | 1.11 (0.66–1.87)              |                            | 0.76*** (0.67–0.87)        |
|                                | 4th quintile           |                            | 0.82 (0.45–1.50)              |                            | 0.67*** (0.57–0.79)        |
|                                | 5th quintile (highest) |                            | 0.84 (0.42–1.68)              |                            | 0.65*** (0.56–0.76)        |

|    |                         |            |                     |                     |
|----|-------------------------|------------|---------------------|---------------------|
| 1  |                         |            |                     |                     |
| 2  |                         |            |                     |                     |
| 3  | Cancer                  | No         | 1.00 (reference)    | 1.00 (reference)    |
| 4  |                         | Yes        | 0.95 (0.32–2.81)    | 1.16 (0.93–1.43)    |
| 5  | Heart disease           | No         | 1.00 (reference)    | 1.00 (reference)    |
| 6  |                         | Yes        | 1.13 (0.67–1.92)    | 1.20 (1.05–1.37)    |
| 7  | Stroke                  | No         | 1.00 (reference)    | 1.00 (reference)    |
| 8  |                         | Yes        | 1.3 (0.56–3.02)     | 1.18 (0.80–1.73)    |
| 9  | Self-rated health       | Good       | 1.00 (reference)    | 1.00 (reference)    |
| 10 |                         | Poor       | 1.71* (1.13–2.59)   | 1.63*** (1.44–1.85) |
| 11 | CES-D score at baseline |            | 1.90*** (1.60–2.25) |                     |
| 12 | GDS score at baseline   |            |                     | 1.92*** (1.86–1.99) |
| 13 | Smoking                 | Never/past | 1.00 (reference)    | 1.00 (reference)    |
| 14 |                         | Current    | 0.76 (0.76–1.56)    | 1.29*** (1.12–1.48) |
| 15 | Drinking                | Never/past | 1.00 (reference)    | 1.00 (reference)    |
| 16 |                         | Current    | 1.41 (0.81 – 2.44)  | 1.02 (0.93 – 1.13)  |

\*,  $p < 0.05$ ; \*\*,  $p < 0.01$ ; \*\*\*,  $p < 0.001$ ; †,  $p < 0.1$

ELSA, English Longitudinal Study of Ageing; JAGES, Japan Gerontological Evaluation Study; CES-D, Center for Epidemiologic Studies Depression Scale; CI, confidence interval; GDS, Geriatric Depression Scale; OR, odds ratio

**Supplementary Table 2. Association between sub-components of social isolation and depressive symptom onset, by complete case analysis**

|                                                   |  | ELSA                   |                      | JAGES               |                      |
|---------------------------------------------------|--|------------------------|----------------------|---------------------|----------------------|
|                                                   |  | Crude OR (95% CI)      | Adjusted OR (95% CI) | Crude OR (95% CI)   | Adjusted OR (95% CI) |
| Social Isolation Index sub-components (ref; none) |  |                        |                      |                     |                      |
| Unmarried or living alone                         |  | 1.91*** (1.34–2.72)    | 1.27 (0.84–1.93)     | 1.33*** (1.18–1.49) | 1.02 (0.88–1.19)     |
| Poor interaction with children                    |  | 1.08 (0.68–1.74)       | 1.51 (0.91–2.50)     | 1.01 (0.98–1.10)    | 1.13* (1.02–1.25)    |
| Poor interaction with relatives                   |  | 1.25 (0.83–1.90)       | 1.33 (0.85–2.08)     | 1.05 (0.97–1.13)    | 0.98 (0.90–1.08)     |
| Poor interaction with friends                     |  | 1.19 (0.78–1.80)       | 1.21 (0.78–1.87)     | 1.23 (1.14–1.33)    | 1.11* (1.01–1.22)    |
| No social participation                           |  | 1.54* (1.08–2.19)      | 1.46† (0.98–2.16)    | 1.70 (1.56–1.86)    | 1.22*** (1.09–1.36)  |
| Age (years)                                       |  |                        |                      |                     |                      |
|                                                   |  | 65–69                  | 1.00 (reference)     |                     | 1.00 (reference)     |
|                                                   |  | 70–74                  | 1.37 (0.83–2.25)     |                     | 1.17** (1.05–1.30)   |
|                                                   |  | 75–79                  | 1.25 (0.72–2.17)     |                     | 1.31*** (1.16–1.49)  |
|                                                   |  | 80–84                  | 1.68† (0.92–3.04)    |                     | 1.60*** (1.36–1.88)  |
|                                                   |  | ≥ 85                   | 1.00 (0.46–2.21)     |                     | 1.78*** (1.38–2.30)  |
| Gender                                            |  | Male                   | 1.00 (reference)     |                     | 1.00 (reference)     |
|                                                   |  | Female                 | 1.59* (1.07–2.37)    |                     | 1.00 (0.89–1.11)     |
| Educational attainment (years)                    |  | < 15                   | 1.00 (reference)     |                     | 1.00 (reference)     |
|                                                   |  | 10–12                  | 1.04 (0.67–1.60)     |                     | 0.81*** (0.74–0.90)  |
|                                                   |  | ≥ 19                   | 1.31 (0.70–2.46)     |                     | 0.69*** (0.61–0.78)  |
| Household equivalised income                      |  | 1st quintile (lowest)  | 1.00 (reference)     |                     | 1.00 (reference)     |
|                                                   |  | 2nd quintile           | 0.71 (0.41–1.23)     |                     | 0.95 (0.83–1.09)     |
|                                                   |  | 3rd quintile           | 1.13 (0.67–1.93)     |                     | 0.76*** (0.67–0.86)  |
|                                                   |  | 4th quintile           | 0.83 (0.45–1.52)     |                     | 0.67*** (0.57–0.79)  |
|                                                   |  | 5th quintile (highest) | 0.85 (0.42–1.71)     |                     | 0.66*** (0.57–0.76)  |
| Cancer                                            |  | No                     | 1.00 (reference)     |                     | 1.00 (reference)     |
|                                                   |  | Yes                    | 0.95 (0.32–2.81)     |                     | 1.15 (0.93–1.43)     |

|                         |            |                     |                     |
|-------------------------|------------|---------------------|---------------------|
| Heart disease           | No         | 1.00 (reference)    | 1.00 (reference)    |
|                         | Yes        | 1.16 (0.69–1.96)    | 1.20** (1.05–1.37)  |
| Stroke                  | No         | 1.00 (reference)    | 1.00 (reference)    |
|                         | Yes        | 1.28 (0.55–2.99)    | 1.18 (0.80–1.73)    |
| Self-rated health       | Good       | 1.00 (reference)    | 1.00 (reference)    |
|                         | Poor       | 1.71* (1.13–2.58)   | 1.62*** (1.43–1.83) |
| CES-D score at baseline |            | 1.89*** (1.59–2.25) | 1.00 (reference)    |
| GDS score at baseline   |            |                     | 1.92*** (1.85–1.99) |
| Smoking                 | Never/past | 1.00 (reference)    | 1.00 (reference)    |
|                         | Current    | 0.74 (0.36–1.53)    | 1.29*** (1.13–1.48) |
| Drinking                | Never/past | 1.00 (reference)    | 1.00 (reference)    |
|                         | Current    | 1.39 (0.80–2.40)    | 1.03 (0.93–1.14)    |

\*,  $p < 0.05$ ; \*\*,  $p < 0.01$ ; \*\*\*,  $p < 0.001$ ; †,  $p < 0.1$

ELSA, English Longitudinal Study of Ageing; JAGES, Japan Gerontological Evaluation Study; CES-D, Center for Epidemiologic Studies Depression Scale; CI, confidence interval; GDS, Geriatric Depression Scale; OR, odds ratio



STROBE Statement—Checklist of items that should be included in reports of *cohort studies*

|                              | Item No | Recommendation                                                                                                                                                                                                                                                                                                         | Page No                                                           |
|------------------------------|---------|------------------------------------------------------------------------------------------------------------------------------------------------------------------------------------------------------------------------------------------------------------------------------------------------------------------------|-------------------------------------------------------------------|
| <b>Title and abstract</b>    | 1       | (a) Indicate the study's design with a commonly used term in the title or the abstract<br>(b) Provide in the abstract an informative and balanced summary of what was done and what was found                                                                                                                          | 1, 3<br>3-4                                                       |
| <b>Introduction</b>          |         |                                                                                                                                                                                                                                                                                                                        |                                                                   |
| Background/rationale         | 2       | Explain the scientific background and rationale for the investigation being reported                                                                                                                                                                                                                                   | 6-8                                                               |
| Objectives                   | 3       | State specific objectives, including any prespecified hypotheses                                                                                                                                                                                                                                                       | 8                                                                 |
| <b>Methods</b>               |         |                                                                                                                                                                                                                                                                                                                        |                                                                   |
| Study design                 | 4       | Present key elements of study design early in the paper                                                                                                                                                                                                                                                                | 8                                                                 |
| Setting                      | 5       | Describe the setting, locations, and relevant dates, including periods of recruitment, exposure, follow-up, and data collection                                                                                                                                                                                        | 8-9                                                               |
| Participants                 | 6       | (a) Give the eligibility criteria, and the sources and methods of selection of participants. Describe methods of follow-up<br>(b) For matched studies, give matching criteria and number of exposed and unexposed                                                                                                      | 8-9<br>Not applicable                                             |
| Variables                    | 7       | Clearly define all outcomes, exposures, predictors, potential confounders, and effect modifiers. Give diagnostic criteria, if applicable                                                                                                                                                                               | 9-10                                                              |
| Data sources/<br>measurement | 8*      | For each variable of interest, give sources of data and details of methods of assessment (measurement). Describe comparability of assessment methods if there is more than one group                                                                                                                                   | 9-10                                                              |
| Bias                         | 9       | Describe any efforts to address potential sources of bias                                                                                                                                                                                                                                                              | 11                                                                |
| Study size                   | 10      | Explain how the study size was arrived at                                                                                                                                                                                                                                                                              | Not applicable                                                    |
| Quantitative variables       | 11      | Explain how quantitative variables were handled in the analyses. If applicable, describe which groupings were chosen and why                                                                                                                                                                                           | 9-10                                                              |
| Statistical methods          | 12      | (a) Describe all statistical methods, including those used to control for confounding<br>(b) Describe any methods used to examine subgroups and interactions<br>(c) Explain how missing data were addressed<br>(d) If applicable, explain how loss to follow-up was addressed<br>(e) Describe any sensitivity analyses | 10-11<br>Not applicable<br>11<br>Not applicable<br>Not applicable |
| <b>Results</b>               |         |                                                                                                                                                                                                                                                                                                                        |                                                                   |
| Participants                 | 13*     | (a) Report numbers of individuals at each stage of study—eg numbers potentially eligible, examined for eligibility, confirmed eligible, included in the study, completing follow-up, and analysed<br>(b) Give reasons for non-participation at each stage<br>(c) Consider use of a flow diagram                        | 12-14<br>Not applicable<br>Not applicable                         |
| Descriptive data             | 14*     | (a) Give characteristics of study participants (eg demographic, clinical, social) and information on exposures and potential confounders<br>(b) Indicate number of participants with missing data for each variable of interest<br>(c) Summarise follow-up time (eg, average and total amount)                         | 12-14<br>13-14<br>9                                               |
| Outcome data                 | 15*     | Report numbers of outcome events or summary measures over time                                                                                                                                                                                                                                                         | 15-16                                                             |

|                                 |                          |    |                                                                                                                                                                                                                                                                                                                                                                                                               |                                               |
|---------------------------------|--------------------------|----|---------------------------------------------------------------------------------------------------------------------------------------------------------------------------------------------------------------------------------------------------------------------------------------------------------------------------------------------------------------------------------------------------------------|-----------------------------------------------|
| 1<br>2<br>3<br>4<br>5<br>6<br>7 | Main results             | 16 | (a) Give unadjusted estimates and, if applicable, confounder-adjusted estimates and their precision (eg, 95% confidence interval). Make clear which confounders were adjusted for and why they were included<br>(b) Report category boundaries when continuous variables were categorized<br>(c) If relevant, consider translating estimates of relative risk into absolute risk for a meaningful time period | 17-18<br><br>Not applicable<br>Not applicable |
| 8<br>9                          | Other analyses           | 17 | Report other analyses done—eg analyses of subgroups and interactions, and sensitivity analyses                                                                                                                                                                                                                                                                                                                | Supplementary 1, 2                            |
| 10                              | <b>Discussion</b>        |    |                                                                                                                                                                                                                                                                                                                                                                                                               |                                               |
| 11                              | Key results              | 18 | Summarise key results with reference to study objectives                                                                                                                                                                                                                                                                                                                                                      | 21                                            |
| 12<br>13<br>14                  | Limitations              | 19 | Discuss limitations of the study, taking into account sources of potential bias or imprecision. Discuss both direction and magnitude of any potential bias                                                                                                                                                                                                                                                    | 23-24                                         |
| 15<br>16<br>17<br>18            | Interpretation           | 20 | Give a cautious overall interpretation of results considering objectives, limitations, multiplicity of analyses, results from similar studies, and other relevant evidence                                                                                                                                                                                                                                    | 21-23                                         |
| 19<br>20                        | Generalisability         | 21 | Discuss the generalisability (external validity) of the study results                                                                                                                                                                                                                                                                                                                                         | Not applicable                                |
| 21                              | <b>Other information</b> |    |                                                                                                                                                                                                                                                                                                                                                                                                               |                                               |
| 22<br>23<br>24                  | Funding                  | 22 | Give the source of funding and the role of the funders for the present study and, if applicable, for the original study on which the present article is based                                                                                                                                                                                                                                                 | 25-26                                         |

\*Give information separately for exposed and unexposed groups.

**Note:** An Explanation and Elaboration article discusses each checklist item and gives methodological background and published examples of transparent reporting. The STROBE checklist is best used in conjunction with this article (freely available on the Web sites of PLoS Medicine at <http://www.plosmedicine.org/>, Annals of Internal Medicine at <http://www.annals.org/>, and Epidemiology at <http://www.epidem.com/>). Information on the STROBE Initiative is available at <http://www.strobe-statement.org>.

# BMJ Open

## Association between social isolation and depression onset among older adults: A cross-national longitudinal study in England and Japan

|                                 |                                                                                                                                                                                                                                                                                                                                                                                                                                                                                                                                                                                                                                                                                                                                                                                                                                                                                                                                                                                                                                                                                                                                                                                                                                                                                                                                                                                                                                                                                                                                                                                                                                                     |
|---------------------------------|-----------------------------------------------------------------------------------------------------------------------------------------------------------------------------------------------------------------------------------------------------------------------------------------------------------------------------------------------------------------------------------------------------------------------------------------------------------------------------------------------------------------------------------------------------------------------------------------------------------------------------------------------------------------------------------------------------------------------------------------------------------------------------------------------------------------------------------------------------------------------------------------------------------------------------------------------------------------------------------------------------------------------------------------------------------------------------------------------------------------------------------------------------------------------------------------------------------------------------------------------------------------------------------------------------------------------------------------------------------------------------------------------------------------------------------------------------------------------------------------------------------------------------------------------------------------------------------------------------------------------------------------------------|
| Journal:                        | <i>BMJ Open</i>                                                                                                                                                                                                                                                                                                                                                                                                                                                                                                                                                                                                                                                                                                                                                                                                                                                                                                                                                                                                                                                                                                                                                                                                                                                                                                                                                                                                                                                                                                                                                                                                                                     |
| Manuscript ID                   | bmjopen-2020-045834.R1                                                                                                                                                                                                                                                                                                                                                                                                                                                                                                                                                                                                                                                                                                                                                                                                                                                                                                                                                                                                                                                                                                                                                                                                                                                                                                                                                                                                                                                                                                                                                                                                                              |
| Article Type:                   | Original research                                                                                                                                                                                                                                                                                                                                                                                                                                                                                                                                                                                                                                                                                                                                                                                                                                                                                                                                                                                                                                                                                                                                                                                                                                                                                                                                                                                                                                                                                                                                                                                                                                   |
| Date Submitted by the Author:   | 11-Feb-2021                                                                                                                                                                                                                                                                                                                                                                                                                                                                                                                                                                                                                                                                                                                                                                                                                                                                                                                                                                                                                                                                                                                                                                                                                                                                                                                                                                                                                                                                                                                                                                                                                                         |
| Complete List of Authors:       | <p>Noguchi, Taiji; National Center for Geriatrics and Gerontology, Department of Social Science, Center for Gerontology and Social Science; Nagoya City University Graduate School of Medical Sciences and Medical School, Department of Public Health</p> <p>Saito, Masashige; Nihon Fukushi University, Faculty of Social Welfare</p> <p>Aida, Jun; Tokyo Medical and Dental University Graduate School of Medical and Dental Sciences, Department of Oral Health Promotion; Tohoku University, Division for Regional Community Development, Liaison Center for Innovative Dentistry</p> <p>Cable, Noriko; University College London, Epidemiology and Public Health</p> <p>Tsuji, Taishi; University of Tsukuba, Faculty of Health and Sport Sciences; Chiba University, Department of Social Preventive Medical Sciences, Center for Preventive Medical Sciences</p> <p>Koyama, Shihoko; Osaka International Cancer Institute, Cancer Control Center</p> <p>Ikeda, Takaaki; Yamagata University Faculty of Medicine Graduate School of Medical Science, Department of Health Policy Science; Tohoku University Graduate School of Dentistry School of Dentistry, Department of International and Community Oral Health</p> <p>Osaka, Ken; Tohoku University Graduate School of Dentistry School of Dentistry, Department of International and Community Oral Health</p> <p>Kondo, Katsunori; Chiba University, Department of Social Preventive Medical Sciences, Center for Preventive Medical Sciences; National Center for Geriatrics and Gerontology, Department of Gerontological Evaluation, Center for Gerontology and Social Science</p> |
| <b>Primary Subject Heading</b>: | Epidemiology                                                                                                                                                                                                                                                                                                                                                                                                                                                                                                                                                                                                                                                                                                                                                                                                                                                                                                                                                                                                                                                                                                                                                                                                                                                                                                                                                                                                                                                                                                                                                                                                                                        |
| Secondary Subject Heading:      | Mental health, Geriatric medicine, Public health                                                                                                                                                                                                                                                                                                                                                                                                                                                                                                                                                                                                                                                                                                                                                                                                                                                                                                                                                                                                                                                                                                                                                                                                                                                                                                                                                                                                                                                                                                                                                                                                    |
| Keywords:                       | EPIDEMIOLOGY, GERIATRIC MEDICINE, Old age psychiatry < PSYCHIATRY, PUBLIC HEALTH, SOCIAL MEDICINE                                                                                                                                                                                                                                                                                                                                                                                                                                                                                                                                                                                                                                                                                                                                                                                                                                                                                                                                                                                                                                                                                                                                                                                                                                                                                                                                                                                                                                                                                                                                                   |
|                                 |                                                                                                                                                                                                                                                                                                                                                                                                                                                                                                                                                                                                                                                                                                                                                                                                                                                                                                                                                                                                                                                                                                                                                                                                                                                                                                                                                                                                                                                                                                                                                                                                                                                     |

1  
2  
3  
4  
5  
6  
7  
8  
9  
10  
11  
12  
13  
14  
15  
16  
17  
18  
19  
20  
21  
22  
23  
24  
25  
26  
27  
28  
29  
30  
31  
32  
33  
34  
35  
36  
37  
38  
39  
40  
41  
42  
43  
44  
45  
46  
47  
48  
49  
50  
51  
52  
53  
54  
55  
56  
57  
58  
59  
60

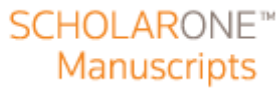

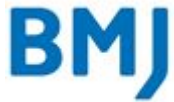

I, the Submitting Author has the right to grant and does grant on behalf of all authors of the Work (as defined in the below author licence), an exclusive licence and/or a non-exclusive licence for contributions from authors who are: i) UK Crown employees; ii) where BMJ has agreed a CC-BY licence shall apply, and/or iii) in accordance with the terms applicable for US Federal Government officers or employees acting as part of their official duties; on a worldwide, perpetual, irrevocable, royalty-free basis to BMJ Publishing Group Ltd ("BMJ") its licensees and where the relevant Journal is co-owned by BMJ to the co-owners of the Journal, to publish the Work in this journal and any other BMJ products and to exploit all rights, as set out in our [licence](#).

The Submitting Author accepts and understands that any supply made under these terms is made by BMJ to the Submitting Author unless you are acting as an employee on behalf of your employer or a postgraduate student of an affiliated institution which is paying any applicable article publishing charge ("APC") for Open Access articles. Where the Submitting Author wishes to make the Work available on an Open Access basis (and intends to pay the relevant APC), the terms of reuse of such Open Access shall be governed by a Creative Commons licence – details of these licences and which [Creative Commons](#) licence will apply to this Work are set out in our licence referred to above.

Other than as permitted in any relevant BMJ Author's Self Archiving Policies, I confirm this Work has not been accepted for publication elsewhere, is not being considered for publication elsewhere and does not duplicate material already published. I confirm all authors consent to publication of this Work and authorise the granting of this licence.

## Original research

### Title

Association between social isolation and depression onset among older adults: A cross-national longitudinal study in England and Japan

Taiji Noguchi<sup>1,2\*</sup>, Masashige Saito<sup>3</sup>, Jun Aida<sup>4,5</sup>, Noriko Cable<sup>6</sup>, Taishi Tsuji<sup>7,8</sup>, Shihoko Koyama<sup>9</sup>, Takaaki Ikeda<sup>10,11</sup>, Ken Osaka<sup>11</sup>, Katsunori Kondo<sup>1,8</sup>

<sup>1</sup>Center for Gerontology and Social Science, National Center for Geriatrics and Gerontology, Aichi, Japan

<sup>2</sup>Department of Public Health, Nagoya City University Graduate School of Medical Sciences, Aichi, Japan

<sup>3</sup>Faculty of Social Welfare, Nihon Fukushi University, Aichi, Japan

<sup>4</sup>Department of Oral Health Promotion, Graduate School of Medical and Dental Sciences, Tokyo Medical and Dental University, Tokyo, Japan

<sup>5</sup>Division for Regional Community Development, Liaison Center for Innovative Dentistry, Graduate School of Dentistry, Tohoku University, Miyagi, Japan

<sup>6</sup>Department of Epidemiology and Public Health, University College London, London,

1  
2  
3  
4  
5  
6 UK

7  
8  
9 <sup>7</sup>Faculty of Health and Sport Sciences, University of Tsukuba, Tokyo, Japan

10  
11  
12 <sup>8</sup>Department of Social Preventive Medical Sciences, Center for Preventive Medical  
13  
14  
15 Sciences, Chiba University, Chiba, Japan

16  
17  
18 <sup>9</sup>Cancer Control Center, Osaka International Cancer Institute, Osaka, Japan

19  
20  
21 <sup>10</sup>Department of Health Policy Science, Graduate School of Medical Science, Yamagata  
22  
23  
24 University, Yamagata, Japan

25  
26  
27 <sup>11</sup>Department of International and Community Oral Health, Tohoku University Graduate  
28  
29  
30 School of Dentistry, Miyagi, Japan

31  
32  
33  
34  
35  
36 **\*Corresponding author**

37  
38  
39 7-430 Morioka, Obu, Aichi 474-8511, Japan

40  
41  
42 E-mail: [noguchi.taiji0415@gmail.com](mailto:noguchi.taiji0415@gmail.com)

43  
44  
45 Tel: +81-562-46-2311; Fax: +81-562-48-7474

46  
47  
48  
49  
50  
51 **Word count:** 3,199 words

1  
2  
3  
4  
5  
6  
7  
8  
9  
10  
11  
12  
13  
14  
15  
16  
17  
18  
19  
20  
21  
22  
23  
24  
25  
26  
27  
28  
29  
30  
31  
32  
33  
34  
35  
36  
37  
38  
39  
40  
41  
42  
43  
44  
45  
46  
47  
48  
49  
50  
51  
52  
53  
54  
55  
56  
57  
58  
59  
60

1 **ABSTRACT**

2 **Objective:** Social isolation is a risk factor for depression in older age. However, little is  
3 known about whether its impact varies depending on country-specific cultural contexts  
4 regarding social relationships. The present study examined the association of social  
5 isolation with depression onset among older adults in England, which has taken advanced  
6 measures against social isolation, and Japan, a super-aged society with a rapidly  
7 increasing number of socially isolated people.

8 **Design:** Prospective longitudinal study.

9 **Setting:** We utilised data from two ongoing studies: the English Longitudinal Study of  
10 Ageing (ELSA) and the Japan Gerontological Evaluation Study (JAGES).

11 **Participants:** Older adults aged  $\geq 65$  years without depression at baseline were followed  
12 up regarding depression onset for two years (2010/11 to 2012/13) for the ELSA and 2.5  
13 years (2010/11 to 2013) for the JAGES.

14 **Primary outcome measure:** Depression was assessed with the Center for Epidemiologic  
15 Studies Depression Scale for the ELSA and Geriatric Depression Scale for the JAGES.  
16 Multivariable logistic regression analysis was performed to evaluate social isolation using  
17 multiple parameters (marital status; interaction with children, relatives, and friends; and  
18 social participation).



1  
2  
3  
4  
5  
6  
7  
8  
9  
10  
11  
12  
13  
14  
15  
16  
17  
18  
19  
20  
21  
22  
23  
24  
25  
26  
27  
28  
29  
30  
31  
32  
33  
34  
35  
36  
37  
38  
39  
40  
41  
42  
43  
44  
45  
46  
47  
48  
49  
50  
51  
52  
53  
54  
55  
56  
57  
58  
59  
60

19 **Results:** The data of 3,331 respondents from the ELSA and 33,127 from the JAGES were  
20 analysed. Multivariable logistic regression analysis demonstrated that social isolation was  
21 significantly associated with depression onset in both countries. In the ELSA, poor  
22 interaction with children was marginally associated with depression onset, while in the  
23 JAGES, poor interaction with children and no social participation significantly affected  
24 depression onset.

25 **Conclusions:** Despite variations in cultural background, social isolation was associated  
26 with depression onset in both England and Japan. Addressing social isolation to safeguard  
27 older adults' mental health must be globally prioritised.

#### 28 29 **Strengths and limitations of this study**

- 30 ● This is the first cross-national longitudinal study to examine the association between  
31 social isolation and depression onset in England, which has taken advanced measures  
32 against social isolation, and Japan, a super-aged society with a rapidly increasing  
33 number of socially isolated people.
- 34 ● This study included a large sample of over 3,300 people from England and 33,000  
35 people from Japan aged 65 years and older.
- 36 ● A limitation of this study is that we cannot make direct comparisons because of

1  
2  
3  
4  
5  
6  
7  
8  
9  
10  
11  
12  
13  
14  
15  
16  
17  
18  
19  
20  
21  
22  
23  
24  
25  
26  
27  
28  
29  
30  
31  
32  
33  
34  
35  
36  
37  
38  
39  
40  
41  
42  
43  
44  
45  
46  
47  
48  
49  
50  
51  
52  
53  
54  
55  
56  
57  
58  
59  
60

37 variations in cohort follow-up periods and depression measurement.

38 ● Another limitation is the use of social support for the evaluation of social contact so

39 as to be able to use the same social isolation assessment scale in both countries.

40

For peer review only

## 41 INTRODUCTION

42 With population ageing, there is growing worldwide interest in social issues concerning  
43 older adults, including social isolation and the deterioration of physical and mental health.

44 Defined as an objective state where an individual has few close relationships or limited  
45 contact within a community,[1] social isolation is recognised as a social determinant of  
46 health with relevance to mortality,[2] cardiovascular diseases,[3] dementia,[4] and mental  
47 health.[5, 6] Social isolation is a major risk factor for mental health problems in older  
48 age. Several systematic reviews have shown that social isolation is associated with  
49 depressive symptoms,[5, 6] which, in turn, are correlated with unhealthy behaviours and  
50 reduced access to material resources.[7] Depression, common in later life, is related to  
51 adverse health outcomes such as poor quality of life[8] and functional disability.[9] With  
52 the high current global burden of depression expected to increase further by 2030,[10]  
53 addressing social isolation is an important gerontological issue for protecting mental  
54 health in older adults.

55 The impacts of social isolation on health may vary by country; this could be the  
56 result of differences in the social environments related to social networks within and  
57 outside the family. A recent study of older adults in England and Japan showed that social  
58 isolation is a common risk factor for mortality in both countries, with a greater impact in

1  
2  
3  
4  
5  
6 59 England; the results are discussed in terms of possible differences between societies that  
7  
8  
9 60 are highly connected and those that are not.[11] In the United Kingdom (UK), in  
10  
11  
12 61 recognition of the impact of social isolation on health and economic loss, the position of  
13  
14  
15 62 ‘Minister of Loneliness’ was established in 2018, and the country is taking a progressive  
16  
17  
18 63 approach to the elimination of social isolation.[12] In contrast, Japan, now a super-aged  
19  
20  
21 64 society (more than 21% of the population aged 65 or above),[13] is experiencing a rapid  
22  
23  
24 65 increase in the trend of abstaining from marriage and weakening community and  
25  
26  
27 66 neighbourhood relations,[14] leading to a rise in the number of socially isolated  
28  
29  
30 67 people.[15] In Japan, the proportion of people who rarely or never spend time with those  
31  
32  
33 68 close to them has been reported to be the highest among Organisation for Economic Co-  
34  
35  
36 69 operation and Development countries. In particular, this figure is much higher than in the  
37  
38  
39 70 UK, which has made advances in tackling social isolation (Japan = 15.3%, UK =  
40  
41  
42 71 5.0%).[16] Owing to differences in social structures and the contexts surrounding social  
43  
44  
45 72 isolation, the impact of social isolation on depression is expected to vary across countries.

46  
47  
48 73 Furthermore, the health effects of social isolation may differ depending on the  
49  
50  
51 74 cultural context of social relationships. In East Asian countries, including Japan, there is  
52  
53  
54 75 a familial norm based on the traditional culture of filial piety,[17] which is often  
55  
56  
57 76 contrasted with individualism in Western countries.[18, 19] Based on this cultural  
58  
59  
60

1  
2  
3  
4  
5  
6 77 background, Japanese social support networks may be kinship centred, which may be  
7  
8  
9 78 narrower than the types of social networks prevalent in other countries.[20] However,  
10  
11  
12 79 there is a lack of consensus on the health effects of social relationships based on these  
13  
14  
15 80 cultural differences. A previous cross-national study showed that in English men,  
16  
17  
18 81 friendship-based social relationships had a significant impact on longevity, whereas in  
19  
20  
21 82 Japanese men, this impact was associated with family-based social relationships.[21] On  
22  
23  
24 83 the contrary, a study of older adults in the United States (US) and Japan found that while  
25  
26  
27 84 relationships with children were associated with a low level of depression only in Japan,  
28  
29  
30 85 the presence of spouses was important in both countries, but more so in the US.[22]  
31  
32  
33 86 Another comparative study among adults suggested that social contact with friends  
34  
35  
36 87 benefitted women's mental health in the UK but not in Japan.[23] Thus, the family-  
37  
38  
39 88 oriented nature of East Asian societies does not automatically imply the health importance  
40  
41  
42 89 of family-based relationships, and the roles of individual components of social isolation  
43  
44  
45 90 (family, friends, and others) in the mental health of older adults in each country remain  
46  
47  
48 91 controversial.

51 92 As the association between social isolation and depression is often described as  
52  
53  
54 93 bidirectional,[24] longitudinal studies are needed to address temporality. However,  
55  
56  
57 94 previous cross-national comparative studies have only employed cross-sectional  
58  
59  
60

1  
2  
3  
4  
5  
6 95 designs.[22, 23] Therefore, using longitudinal data from both countries, the present study  
7  
8  
9 96 aims to investigate the association of social isolation with depression onset in England,  
10  
11  
12 97 which has taken advanced measures against social isolation, and Japan, a super-aged  
13  
14  
15 98 society with a rapidly increasing number of socially isolated people.  
16  
17

18 99

## 100 **METHODS**

### 101 **Sample**

102 This longitudinal study was conducted using data from two ongoing prospective cohort  
103 studies: the English Longitudinal Study of Ageing (ELSA) and the Japan Gerontological  
104 Evaluation Study (JAGES). The ELSA targets independent-living older adults aged  $\geq 50$ ,  
105 while JAGES participants are community-dwelling individuals aged  $\geq 65$  who are  
106 ineligible for long-term healthcare insurance benefits.[25] Details of the ELSA and  
107 JAGES can be found elsewhere.[26, 27] For the present analysis, we used the two waves  
108 of data that most closely corresponded with the timing of our study: wave 5 (2010/2011)  
109 to wave 6 (2012/2013) for the ELSA, and wave 1 (2010/2011) to wave 2 (2013) for the  
110 JAGES. We harmonised the data by including older adults aged  $\geq 65$ , independent in  
111 activities of daily living, and without self-reported dementia. For analysis, respondents  
112 who scored above the cut-off point for depression on each measure in the respective

1  
2  
3  
4  
5  
6 113 cohort at baseline were excluded, and we followed up the onset of depression for two  
7  
8  
9 114 years for the ELSA and 2.5 years for the JAGES.  
10  
11

12  
13 115

14  
15 116 **Depression**

16  
17  
18 117 Based on a previous cross-national study,[28] depressive symptoms were measured both  
19  
20  
21 118 at baseline and follow-up using eight items from the Center for Epidemiologic Studies  
22  
23  
24 119 Depression Scale (CES-D) in the ELSA[29] and the Geriatric Depression Scale (GDS-  
25  
26  
27 120 15) in the JAGES.[30] To identify possible depressive cases, the CES-D cut-off was  $\geq 4$   
28  
29  
30 121 while that for the GDS-15 was  $\geq 5$ . [31, 32] As previously mentioned, respondents with  
31  
32  
33 122 depression at baseline were excluded, and we observed the onset of depression during  
34  
35  
36 123 follow-up.  
37  
38

39  
40 124

41  
42 125 **Social isolation**

43  
44  
45 126 Social isolation levels were assessed using a modified version of the Social Isolation  
46  
47  
48 127 Index (SII).[33–35] The index was computed with respondents given a point if they: (1)  
49  
50  
51 128 were unmarried or living alone, (2) had poor interaction with children (did not live with  
52  
53  
54 129 their children or had no one to provide emotional or instrumental social support), (3) had  
55  
56  
57 130 poor interaction with relatives (did not have immediate family members providing  
58  
59  
60

1  
2  
3  
4  
5  
6 131 emotional or instrumental social support), (4) had poor interaction with friends (less than  
7  
8  
9 132 monthly contact or no friends who could provide emotional or instrumental social  
10  
11  
12 133 support), and (5) had no social participation (no participation in any social or religious  
13  
14  
15 134 groups). The total possible score ranged from 0 to 5, with higher scores indicating greater  
16  
17  
18 135 social isolation. The participants were categorised into the following five groups based  
19  
20  
21 136 on their scores: 0, 1, 2, 3, and 4–5 points. We used the total score and the scores of the  
22  
23  
24 137 five sub-components as predictive variables.  
25  
26  
27  
28  
29

138

### 139 **Covariates**

140 The covariates included age, gender, educational attainment, household equivalised  
141 income, present illness, self-rated health, smoking, and drinking. Age was categorised as  
142 65–69, 70–74, 75–79, 80–84, and  $\geq 85$ . Based on the ages of respondents who had  
143 completed formal education, the age of final educational attainment was categorised as  $\leq$   
144 15 years, 16–18 years, and  $\geq 19$  years. Household equivalised income was classified into  
145 quintiles. Present illness was classified as ‘yes’ or ‘no’ for cancer, heart disease, and  
146 stroke. Self-rated health was dichotomised as ‘poor’ and ‘good’. Smoking and drinking  
147 were dichotomised as ‘never/past’ and ‘current’.

148



1  
2  
3  
4  
5  
6  
7  
8  
9  
10  
11  
12  
13  
14  
15  
16  
17  
18  
19  
20  
21  
22  
23  
24  
25  
26  
27  
28  
29  
30  
31  
32  
33  
34  
35  
36  
37  
38  
39  
40  
41  
42  
43  
44  
45  
46  
47  
48  
49  
50  
51  
52  
53  
54  
55  
56  
57  
58  
59  
60

149 **Statistical analysis**

150 We analysed the ELSA and JAGES data separately because of differences in research  
151 design, especially sampling approaches. A longitudinal weight was applied to account for  
152 survey non-response for the ELSA but not the JAGES as its design does not allow it.  
153 First, we calculated descriptive statistics. Second, we conducted a multivariable logistic  
154 regression analysis to examine the association between SII score and depression onset  
155 and obtained odds ratios (ORs) and 95% confidence intervals (CIs) for depression onset.  
156 Model 1 was not adjusted for covariates while Model 2 was adjusted for all covariates.  
157 Additionally, we analysed the association between SII sub-components and depression  
158 onset, adjusted for all covariates.

159 To mitigate potential biases resulting from missing information, we used the  
160 multiple imputation approach under the missing at random assumption. We generated 20  
161 imputed datasets for the final analysis, which excluded those who met the exclusion  
162 criteria and did not respond to the follow-up surveys, using the multiple imputation by  
163 chained equations procedure and pooled the results using Rubin's rule.[36]

164 The significance level was set at  $p < 0.05$ . We used R (Version 3.5.2 for  
165 Windows) for all statistical analyses.

166

1  
2  
3  
4  
5  
6 167 **Ethical considerations**  
7

8  
9 168 The ELSA investigators received ethical approval for all waves of the study from the  
10  
11  
12 169 National Health Service Research Ethics Committees under the National Research and  
13  
14  
15 170 Ethics Services (MREC/01/2/91). The JAGES protocols were approved by the Ethics  
16  
17  
18 171 Committee on the Research of Human Subjects at Nihon Fukushi University (10-05).  
19

20  
21 172  
22

23  
24 173 **Patient and public involvement**  
25

26  
27 174 No patients were involved in the development of the research question, study design, or  
28  
29  
30 175 data interpretation.  
31

32  
33 176  
34

35  
36 177 **RESULTS**  
37

38  
39 178 A total of 3,331 ELSA respondents and 33,127 JAGES respondents were included in the  
40  
41  
42 179 final analysis. Their baseline characteristics are presented in Table 1. The mean age  
43  
44  
45 180 (standard deviation) was 73.6 (6.9) years for the ELSA and 72.4 (5.4) years for the JAGES.  
46  
47  
48 181 Regarding SII scores, the ELSA had the largest number of respondents with 0 and 1 points,  
49  
50  
51 182 while the JAGES had the largest number with 2 and 3 points. In the ELSA, respondents  
52  
53  
54 183 who were older, male, less educated, had a lower income, had heart disease, had poor  
55  
56  
57 184 self-rated health, smoked, did not consume much alcohol, and had higher baseline  
58  
59  
60

1  
2  
3  
4  
5  
6 185 depressive symptom scores had higher SII scores. A similar trend was observed in the  
7  
8  
9 186 JAGES, but here, those who consumed more alcohol had higher SII scores.  
10  
11  
12  
13  
14  
15  
16  
17  
18  
19  
20  
21  
22  
23  
24  
25  
26  
27  
28  
29  
30  
31  
32  
33  
34  
35  
36  
37  
38  
39  
40  
41  
42  
43  
44  
45  
46  
47  
48  
49  
50  
51  
52  
53  
54  
55  
56  
57  
58  
59  
60

For peer review only

187 **Table 1. Respondents' baseline characteristics**

|                                     | ELSA <sup>a</sup>                         |          |         |         |        | JAGES                                     |          |          |          |          |
|-------------------------------------|-------------------------------------------|----------|---------|---------|--------|-------------------------------------------|----------|----------|----------|----------|
|                                     | Social Isolation Index score <sup>b</sup> |          |         |         |        | Social Isolation Index score <sup>b</sup> |          |          |          |          |
|                                     | 0                                         | 1        | 2       | 3       | ≥ 4    | 0                                         | 1        | 2        | 3        | ≥ 4      |
|                                     | n = 905                                   | n = 1049 | n = 596 | n = 216 | n = 49 | n = 1402                                  | n = 5981 | n = 9723 | n = 8735 | n = 2176 |
|                                     | (27.2%)                                   | (31.5%)  | (17.9%) | (6.5%)  | (1.5%) | (4.2%)                                    | (18.0%)  | (29.4%)  | (26.4%)  | (6.6%)   |
| Age (years), (%)                    |                                           |          |         |         |        |                                           |          |          |          |          |
| 65–69                               | 41.0                                      | 36.4     | 29.9    | 27.6    | 28.3   | 38.6                                      | 40.5     | 38.0     | 37.0     | 35.8     |
| 70–74                               | 26.1                                      | 28.3     | 28.8    | 29.3    | 23.6   | 32.1                                      | 32.5     | 31.6     | 31.0     | 30.4     |
| 75–79                               | 20.9                                      | 17.5     | 19.3    | 15.8    | 20.4   | 19.2                                      | 18.3     | 19.5     | 20.3     | 21.9     |
| 80–84                               | 9.1                                       | 12.2     | 12.5    | 14.5    | 15.5   | 8.3                                       | 6.7      | 8.3      | 9.0      | 8.8      |
| ≥ 85                                | 2.8                                       | 5.7      | 9.5     | 12.8    | 12.2   | 1.9                                       | 2.0      | 2.6      | 2.7      | 3.1      |
| Gender, (%)                         |                                           |          |         |         |        |                                           |          |          |          |          |
| Men                                 | 50.0                                      | 46.1     | 45.3    | 51.9    | 65.8   | 27.2                                      | 35.1     | 47.0     | 64.4     | 66.1     |
| Women                               | 50.0                                      | 53.9     | 54.7    | 48.1    | 34.2   | 72.8                                      | 64.9     | 53.0     | 35.6     | 33.9     |
| Educational attainment (years), (%) |                                           |          |         |         |        |                                           |          |          |          |          |
| ≤ 15                                | 44.1                                      | 51.3     | 52.3    | 60.9    | 69.6   | 42.9                                      | 38.1     | 37.9     | 38.7     | 48.6     |
| 16–18                               | 35.0                                      | 33.8     | 34.6    | 27.5    | 14.1   | 40.9                                      | 40.8     | 39.3     | 36.8     | 31.1     |
| ≥ 19                                | 17.8                                      | 12.5     | 11.0    | 10.3    | 14.0   | 15.7                                      | 20.4     | 21.8     | 23.3     | 18.5     |
| Missing                             | 3.2                                       | 2.4      | 2.1     | 1.3     | 2.3    | 0.5                                       | 0.7      | 0.9      | 1.2      | 1.8      |
| Household equivalised income, (%)   |                                           |          |         |         |        |                                           |          |          |          |          |
| 1st quintile (lowest)               | 11.4                                      | 18.3     | 23.2    | 31.2    | 14.4   | 7.4                                       | 10.9     | 13.9     | 15.6     | 21.3     |
| 2nd quintile                        | 21.5                                      | 23.7     | 26.1    | 24.1    | 29.6   | 13.2                                      | 13.5     | 15.0     | 15.5     | 16.4     |
| 3rd quintile                        | 20.9                                      | 21.8     | 18.9    | 19.5    | 27.1   | 22.5                                      | 30.6     | 30.3     | 30.6     | 28.0     |
| 4th quintile                        | 21.9                                      | 19.9     | 18.1    | 16.5    | 16.6   | 14.3                                      | 13.6     | 12.7     | 11.3     | 9.5      |
| 5th quintile (highest)              | 22.7                                      | 15.0     | 12.7    | 8.3     | 12.4   | 31.5                                      | 22.5     | 19.2     | 16.8     | 12.9     |
| Missing                             | 1.5                                       | 1.3      | 0.9     | 0.4     | 0.0    | 11.1                                      | 8.9      | 8.9      | 10.2     | 11.9     |
| Cancer, (%)                         |                                           |          |         |         |        |                                           |          |          |          |          |
| No                                  | 96.5                                      | 95.8     | 97.1    | 97.5    | 96.5   | 91.0                                      | 91.2     | 90.8     | 90.1     | 89.7     |
| Yes                                 | 3.4                                       | 4.2      | 2.9     | 2.5     | 3.5    | 3.2                                       | 3.1      | 3.1      | 3.4      | 3.7      |
| Missing                             | 0.1                                       | 0.0      | 0.0     | 0.0     | 0.0    | 5.8                                       | 5.7      | 6.1      | 6.5      | 6.6      |
| Heart disease, (%)                  |                                           |          |         |         |        |                                           |          |          |          |          |
| No                                  | 90.7                                      | 86.9     | 88.4    | 88.3    | 77.3   | 91.0                                      | 91.2     | 90.8     | 90.1     | 89.7     |
| Yes                                 | 9.3                                       | 13.0     | 11.6    | 11.7    | 22.7   | 3.2                                       | 3.1      | 3.1      | 3.4      | 3.7      |
| Missing                             | 0.0                                       | 0.1      | 0.0     | 0.0     | 0.0    | 5.8                                       | 5.7      | 6.1      | 6.5      | 6.6      |

|                              |      |      |      |      |      |      |      |      |      |      |  |
|------------------------------|------|------|------|------|------|------|------|------|------|------|--|
| Stroke, (%)                  |      |      |      |      |      |      |      |      |      |      |  |
| No                           | 96.3 | 96.1 | 97   | 94.4 | 96.6 | 93.3 | 93.6 | 93.1 | 92.5 | 92.2 |  |
| Yes                          | 3.7  | 3.8  | 3.0  | 5.6  | 3.4  | 0.9  | 0.8  | 0.8  | 1.0  | 1.2  |  |
| Missing                      | 0    | 0.1  | 0.0  | 0.0  | 0.0  | 5.8  | 5.7  | 6.1  | 6.5  | 6.6  |  |
| Self-rated health, (%)       |      |      |      |      |      |      |      |      |      |      |  |
| Good                         | 86.4 | 79.9 | 78.8 | 75.4 | 71.3 | 92.0 | 91.7 | 90.6 | 90.2 | 87.2 |  |
| Poor                         | 13.6 | 20.1 | 21.2 | 24.6 | 28.7 | 7.2  | 7.7  | 8.6  | 9.0  | 12.2 |  |
| Missing                      | 0.0  | 0.0  | 0.0  | 0.0  | 0.0  | 0.8  | 0.5  | 0.8  | 0.8  | 0.6  |  |
| Smoking, (%)                 |      |      |      |      |      |      |      |      |      |      |  |
| Never/past                   | 95.5 | 93.1 | 89.8 | 82.9 | 89.4 | 86.4 | 86.1 | 82.9 | 81.5 | 78.4 |  |
| Current                      | 4.5  | 6.9  | 10.2 | 17.1 | 10.6 | 6.4  | 7.4  | 9.5  | 11.3 | 14.2 |  |
| Missing                      | 0.0  | 0.0  | 0.0  | 0.0  | 0.0  | 7.1  | 6.5  | 7.5  | 7.2  | 7.3  |  |
| Drinking, (%)                |      |      |      |      |      |      |      |      |      |      |  |
| Never/past                   | 7.5  | 11.8 | 14.9 | 25.8 | 17.3 | 65.0 | 60.0 | 56.5 | 50.4 | 55.0 |  |
| Current                      | 91.3 | 87.0 | 82.9 | 72.6 | 73.6 | 30.2 | 35.7 | 38.6 | 44.7 | 40.4 |  |
| Missing                      | 1.3  | 1.2  | 2.2  | 1.6  | 9.2  | 4.8  | 4.3  | 4.9  | 4.9  | 4.6  |  |
| CES-D score at baseline, (%) |      |      |      |      |      |      |      |      |      |      |  |
| 0                            | 57.2 | 52.0 | 45.5 | 42.2 | 54.0 |      |      |      |      |      |  |
| 1                            | 27.3 | 26.2 | 28.6 | 31.8 | 25.5 |      |      |      |      |      |  |
| 2                            | 9.8  | 13.8 | 17.1 | 11.9 | 15.1 |      |      |      |      |      |  |
| 3                            | 5.7  | 8.0  | 8.8  | 14.2 | 5.4  |      |      |      |      |      |  |
| GDS score at baseline, (%)   |      |      |      |      |      |      |      |      |      |      |  |
| 0                            |      |      |      |      |      | 20.5 | 30.4 | 29.0 | 26.4 | 24.3 |  |
| 1                            |      |      |      |      |      | 25.5 | 28.4 | 28.6 | 26.9 | 27.0 |  |
| 2                            |      |      |      |      |      | 22.5 | 20.0 | 19.8 | 21.5 | 21.1 |  |
| 3                            |      |      |      |      |      | 17.5 | 13.1 | 13.5 | 14.7 | 15.9 |  |
| 4                            |      |      |      |      |      | 14.1 | 8.1  | 9.1  | 10.5 | 11.7 |  |

188 ELSA, English Longitudinal Study of Ageing; JAGES, Japan Gerontological Evaluation  
 189 Study; CES-D, Center for Epidemiologic Studies Depression Scale; GDS, Geriatric  
 190 Depression Scale

191 <sup>a</sup> ELSA data after sampling weight

192 <sup>b</sup> Missing data: ELSA, n = 516; JAGES, n = 5,110

1  
2  
3  
4  
5  
6 193 Table 2 presents the description of social isolation and depression onset. At  
7  
8  
9 194 follow-up, 201 (6.0%) ELSA respondents and 4,456 (13.5%) JAGES respondents  
10  
11  
12 195 exhibited depression onset. In both studies, higher SII scores were associated with an  
13  
14  
15 196 increased risk of depression onset. Regarding SII sub-components, ELSA respondents  
16  
17  
18 197 who were unmarried or living alone were more likely to have depression, while this was  
19  
20  
21 198 the case with JAGES respondents with no social participation.  
22  
23  
24  
25  
26  
27  
28  
29  
30  
31  
32  
33  
34  
35  
36  
37  
38  
39  
40  
41  
42  
43  
44  
45  
46  
47  
48  
49  
50  
51  
52  
53  
54  
55  
56  
57  
58  
59  
60

199 **Table 2. Description of social isolation status and depression onset**

|                                            |         | ELSA <sup>a</sup>        |                   | JAGES                  |                     |
|--------------------------------------------|---------|--------------------------|-------------------|------------------------|---------------------|
|                                            |         | CES-D score at follow-up |                   | GDS score at follow-up |                     |
|                                            |         | < 4                      | ≥ 4               | < 5                    | ≥ 5                 |
|                                            |         | n = 3130<br>(94.0%)      | n = 201<br>(6.0%) | n = 28671<br>(86.5%)   | n = 4456<br>(13.5%) |
| Social Isolation Index score, (%)          |         |                          |                   |                        |                     |
| 0                                          |         | 27.5                     | 13.5              | 4.4                    | 3.0                 |
| 1                                          |         | 31.2                     | 29.3              | 18.6                   | 14.3                |
| 2                                          |         | 17.9                     | 18.9              | 29.8                   | 26.3                |
| 3                                          |         | 6.5                      | 10.1              | 26.2                   | 27.5                |
| ≥ 4                                        |         | 1.5                      | 2.9               | 6.1                    | 9.3                 |
| Missing                                    |         | 15.4                     | 25.3              | 14.8                   | 19.7                |
| Social Isolation Index sub-components, (%) |         |                          |                   |                        |                     |
| Unmarried or living alone                  | No      | 71.9                     | 58.5              | 88.3                   | 85.2                |
|                                            | Yes     | 28.1                     | 41.5              | 10.2                   | 12.7                |
|                                            | Missing | 0.0                      | 0.0               | 1.4                    | 2.1                 |
| Poor interaction with children             | No      | 81.8                     | 73.4              | 26.6                   | 25.0                |
|                                            | Yes     | 12.5                     | 14.7              | 71.7                   | 72.9                |
|                                            | Missing | 5.7                      | 11.8              | 1.7                    | 2.1                 |
| Poor interaction with relatives            | No      | 76.3                     | 68.1              | 41.1                   | 38.7                |
|                                            | Yes     | 17.3                     | 18.6              | 54.4                   | 56.0                |
|                                            | Missing | 6.4                      | 13.4              | 4.5                    | 5.4                 |
| Poor interaction with friends              | No      | 72.2                     | 66.0              | 37.1                   | 31.2                |
|                                            | Yes     | 18.4                     | 21.6              | 58.2                   | 63.8                |
|                                            | Missing | 9.4                      | 12.4              | 4.6                    | 5.0                 |
| No social participation                    | No      | 61.7                     | 46.3              | 75.0                   | 63.9                |
|                                            | Yes     | 28.4                     | 32.5              | 13.0                   | 20.0                |
|                                            | Missing | 10.0                     | 21.2              | 11.7                   | 16.1                |

200 ELSA, English Longitudinal Study of Ageing; JAGES, Japan Gerontological Evaluation  
 201 Study; CES-D, Center for Epidemiologic Studies Depression Scale; GDS, Geriatric  
 202 Depression Scale

203 <sup>a</sup> ELSA data after sampling weight

1  
2  
3  
4  
5  
6 204 Table 3 depicts the association between SII scores and depression onset.  
7  
8  
9 205 Multivariable analysis showed that higher SII scores were associated with a higher risk  
10  
11  
12 206 of depression onset in both studies after adjusting for all covariates. In the ELSA, the OR  
13  
14  
15 207 of depression onset was significantly higher from a score  $\geq$  one point (OR [95% CI]  
16  
17  
18 208 compared with zero points, one: 1.68 [1.02–2.75], two: 1.77 [1.03–3.05], three: 2.64  
19  
20  
21 209 [1.37–5.12],  $\geq$  four: 4.01 [1.43–11.22],  $p$  for trend = 0.015). In the JAGES, as SII scores  
22  
23  
24 210 increased, the OR of depression onset gradually increased, reaching significance at  $\geq$   
25  
26  
27 211 three points (OR [95% CI] compared with zero points, one: 1.10 [0.89–1.35], two: 1.15  
28  
29  
30 212 [0.94–1.40], three: 1.28 [1.04–1.56],  $\geq$  four: 1.48 [1.18–1.85],  $p$  for trend < 0.001). These  
31  
32  
33 213 results showed almost the same tendency as the complete case analysis without multiple  
34  
35  
36 214 imputation (Supplementary Table 1).  
37  
38  
39  
40  
41  
42  
43  
44  
45  
46  
47  
48  
49  
50  
51  
52  
53  
54  
55  
56  
57  
58  
59  
60



215 **Table 3. Association between social isolation and depression onset: multivariable logistic regression analysis**

|                              | ELSA                       |                                   | JAGES                      |                                   |
|------------------------------|----------------------------|-----------------------------------|----------------------------|-----------------------------------|
|                              | Crude OR (95% CI)          | Adjusted OR (95% CI) <sup>a</sup> | Crude OR (95% CI)          | Adjusted OR (95% CI) <sup>a</sup> |
| Social Isolation Index score |                            |                                   |                            |                                   |
| 0                            | 1.00 (reference)           | 1.00 (reference)                  | 1.00 (reference)           | 1.00 (reference)                  |
| 1                            | 1.92** (1.19–3.10)         | 1.68* (1.02–2.75)                 | 1.14 (0.94–1.39)           | 1.10 (0.89–1.35)                  |
| 2                            | 2.15** (1.28–3.62)         | 1.77* (1.03–3.05)                 | 1.32** (1.09–1.60)         | 1.15 (0.94–1.40)                  |
| 3                            | 3.19*** (1.73–5.90)        | 2.64** (1.37–5.12)                | 1.57*** (1.30–1.90)        | 1.28* (1.04–1.56)                 |
| ≥ 4                          | 3.85** (1.46–10.18)        | 4.01** (1.43–11.22)               | 2.26*** (1.83–2.79)        | 1.48*** (1.18–1.85)               |
|                              | <i>p</i> for trend < 0.001 | <i>p</i> for trend = 0.015        | <i>p</i> for trend < 0.001 | <i>p</i> for trend < 0.001        |

216 \*  $p < 0.05$ ; \*\*  $p < 0.01$ ; \*\*\*  $p < 0.001$ 

217 ELSA, English Longitudinal Study of Ageing; JAGES, Japan Gerontological Evaluation Study; CI, confidence interval; OR, odds ratio

218 <sup>a</sup> Adjusted for age, gender, educational attainment, household equivalised income, present illness (cancer, heart disease, and stroke), self-rated health, smoking, drinking, and depression score at baseline (Center for Epidemiologic Studies Depression Scale for the ELSA and Geriatric Depression Scale for the JAGES).  
219  
220

1  
2  
3  
4  
5  
6 221 Table 4 presents the associations of SII sub-components with depression onset.  
7  
8  
9 222 In the ELSA, sub-components were not significant, although poor interaction with  
10  
11  
12 223 children was marginally significant (OR [95% CI], with ‘none’ as the reference;  
13  
14  
15 224 unmarried or living alone: 1.13 [0.80–1.60], poor interaction with children: 1.55 [1.00–  
16  
17  
18 225 2.41], poor interaction with relatives: 1.24 [0.79–1.94], poor interaction with friends: 1.15  
19  
20  
21 226 [0.77–1.71], no social participation: 1.22 [0.80–1.87]). In the JAGES, poor interaction  
22  
23  
24 227 with children and no social participation were significantly associated with depression  
25  
26  
27 228 onset after adjusting for all covariates (OR [95% CI], with ‘none’ as the reference;  
28  
29  
30 229 unmarried or living alone: 1.11 [1.00–1.24], poor interaction with children: 1.09 [1.01–  
31  
32  
33 230 1.19], poor interaction with relatives: 1.04 [0.96–1.12], poor interaction with friends: 1.03  
34  
35  
36 231 [0.95–1.11], no social participation: 1.28 [1.17–1.40]). These results were similar to those  
37  
38  
39 232 obtained from the complete case analysis (Supplementary Table 2).  
40  
41  
42  
43  
44  
45  
46  
47  
48  
49  
50  
51  
52  
53  
54  
55  
56  
57  
58  
59  
60

233 **Table 4. Association between sub-components of social isolation and depression onset: multivariable logistic regression analysis**

|                                                         | ELSA                              | JAGES                             |
|---------------------------------------------------------|-----------------------------------|-----------------------------------|
|                                                         | Adjusted OR (95% CI) <sup>a</sup> | Adjusted OR (95% CI) <sup>a</sup> |
| Social Isolation Index sub-components (reference: none) |                                   |                                   |
| Unmarried or living alone                               | 1.13 (0.80–1.60)                  | 1.11 <sup>†</sup> (1.00–1.24)     |
| Poor interaction with children                          | 1.55 <sup>†</sup> (1.00–2.41)     | 1.09* (1.01–1.19)                 |
| Poor interaction with relatives                         | 1.24 (0.79–1.94)                  | 1.04 (0.96–1.12)                  |
| Poor interaction with friends                           | 1.15 (0.77–1.71)                  | 1.03 (0.95–1.11)                  |
| No social participation                                 | 1.22 (0.80–1.87)                  | 1.28*** (1.17–1.40)               |

234 \*  $p < 0.05$ ; \*\*  $p < 0.01$ ; \*\*\*  $p < 0.001$ ; <sup>†</sup>  $p < 0.1$

235 ELSA, English Longitudinal Study of Ageing; JAGES, Japan Gerontological Evaluation Study; CI, confidence interval; OR, odds ratio

236 <sup>a</sup> Adjusted for age, gender, educational attainment, equivalent income, present illness (cancer, heart disease, and stroke), self-rated health,  
 237 smoking, drinking, and depression score at baseline (Center for Epidemiologic Studies Depression Scale for the ELSA and Geriatric  
 238 Depression Scale for the JAGES).

1  
2  
3  
4  
5  
6 239 **DISCUSSION**  
7

8  
9 240 To the best of our knowledge, this is the first cross-national longitudinal study of the  
10  
11  
12 241 association of social isolation with depression among older English and Japanese adults.  
13  
14  
15 242 Social isolation was significantly associated with depression onset in both countries. Our  
16  
17  
18 243 results support previous longitudinal findings on social relationships and mental health in  
19  
20  
21 244 older adults in England[37] and Japan.[38] Using data frames that were similar with  
22  
23  
24 245 regard to assessment and covariates, we showed that social isolation is a common risk  
25  
26  
27 246 factor for depression in England and Japan despite country-specific cultural differences  
28  
29  
30 247 regarding social relationships. Thus, our results suggest that to safeguard the mental  
31  
32  
33 248 health of older adults, addressing social isolation is a global need.  
34

35  
36 249 The association between social isolation and depression was somewhat stronger  
37  
38  
39 250 in England than in Japan. These results are similar to a previous report concerning  
40  
41  
42 251 mortality among older adults in England and Japan.[11] Although we cannot make direct  
43  
44  
45 252 comparisons because of variations in cohort follow-up periods and depression  
46  
47  
48 253 measurement, there are several possible reasons for this pattern of findings. The impact  
49  
50  
51 254 of social factors could be different depending on the group and society to which one  
52  
53  
54 255 belongs. This is best understood in the context of the concept of relative deprivation.[39]  
55  
56  
57 256 In other words, higher levels of relative social isolation may induce greater psychological  
58  
59  
60

1  
2  
3  
4  
5  
6 257 stress. A previous study showed that rich community ties and cohesion were protective  
7  
8  
9 258 factors for health but could have a negative effect on those who were not socially  
10  
11  
12 259 involved.[40] Being isolated in a connected society such as the UK may represent a more  
13  
14  
15 260 severe condition, with a stronger negative impact on mental health.

16  
17  
18 261 Our results showed that poor interaction with children was significant with  
19  
20  
21 262 regard to depression onset in Japan. In England, while the association was marginal, of  
22  
23  
24 263 the components of social isolation, poor interaction with children had the greatest effect.  
25  
26  
27 264 The lack of interaction with children could have an adverse effect on the mental health of  
28  
29  
30 265 older adults in both countries. Previous studies in England[41] and Japan[22] have  
31  
32  
33 266 reported that social support from children can contribute to alleviating depression, and  
34  
35  
36 267 our results point in the same direction. Older adults without children can be considered a  
37  
38  
39 268 vulnerable group, because adult children, in particular, are often the main source of  
40  
41  
42 269 positive social support for older parents.[42] Older parents have certain expectations with  
43  
44  
45 270 regard to receiving support from their children, and situations wherein these expectations  
46  
47  
48 271 are not met may lead to depressive mood.[43] On the contrary, a previous study reported  
49  
50  
51 272 no association between the presence of children and depression among older adults in the  
52  
53  
54 273 US.[22] Owing to strong spousal relationships in the US, the effect of the presence of  
55  
56  
57 274 children might be relatively small. Thus, our study confirmed the adverse effects of poor  
58  
59  
60

1  
2  
3  
4  
5  
6 275 interaction with children common to England and Japan, but international generalizability  
7  
8  
9 276 can only be established based on further research considering the cultural background of  
10  
11  
12 277 family relationships in individual countries.  
13  
14

15 278 Although traditionally Japan is a country where adult children are expected to  
16  
17  
18 279 demonstrate reciprocity with their parents owing to the strong family and kinship-based  
19  
20  
21 280 cultural background,[44] in this study, the effect of interaction with children on  
22  
23  
24 281 depression was relatively modest. In recent years, with trends such as adult children  
25  
26  
27 282 commonly living apart from their parents after marriage[45] and the development of  
28  
29  
30 283 public long-term care services for the ageing population,[46] Japan's family system has  
31  
32  
33 284 not remained as traditional as before. Therefore, interaction with children may not be as  
34  
35  
36 285 essential to the health of older adults as before. However, despite these cultural transitions,  
37  
38  
39 286 we believe that interaction with children has some value with regard to preventing  
40  
41  
42 287 depression in old age in Japan.  
43  
44

45 288 Social participation was a strong protective factor for depression onset in Japan,  
46  
47  
48 289 whereas there was no association in England, although the OR was somewhat greater.  
49  
50  
51 290 Several previous studies have reported that social participation helps prevent depression  
52  
53  
54 291 onset.[37, 47–49] Our results pertaining to Japan support these reports. On the contrary,  
55  
56  
57 292 the protective effects of social participation on mental health have been shown to vary  
58  
59  
60

1  
2  
3  
4  
5  
6 293 depending on the type of organisation an individual is involved with,[48] the individual's  
7  
8  
9 294 attitude towards participation,[48] and the duration[37] and frequency[49] of  
10  
11  
12 295 participation. Regarding the present study, in the English context, the role of social  
13  
14  
15 296 participation in depression prevention might have been unidentifiable because of  
16  
17  
18 297 differences in the effects of these participation contexts. We only took into account social  
19  
20  
21 298 participation, without delving into specific types. Thus, the context of effective social  
22  
23  
24 299 participation, such as type, duration, and role in the organisation in both countries,  
25  
26  
27 300 requires further investigation. Despite these challenges, our findings suggest that in Japan,  
28  
29  
30 301 social isolation prevention measures based on the promotion of social participation could  
31  
32  
33 302 be beneficial for safeguarding the mental health of older adults.

34  
35  
36 303 This study has several strengths. First, it is the first cross-national population-  
37  
38  
39 304 level investigation of the association of social isolation with depression onset using a  
40  
41  
42 305 unified data frame. Second, by using two longitudinal datasets, we were able to examine  
43  
44  
45 306 the prospective association between social isolation and depression. Third, the use of  
46  
47  
48 307 large-scale data allowed us to detect the effects of relatively rare situations of severe  
49  
50  
51 308 social isolation.

52  
53  
54 309 However, certain limitations cannot be ignored. First, the measurement of  
55  
56  
57 310 depression in the two cohorts was not the same. Therefore, we could not directly compare  
58  
59  
60

1  
2  
3  
4  
5  
6 311 depression onset in the two countries. However, these measurements were also used in a  
7  
8  
9 312 previous cross-national comparison study in England and Japan,[28] and we were able to  
10  
11  
12 313 examine the association between social isolation and depression onset in both countries  
13  
14  
15 314 using the same data frame. Second, we used social support for the assessment of social  
16  
17  
18 315 contact for some items in order to be able to use the same SII. Therefore, cultural  
19  
20  
21 316 differences in expectations regarding the receipt of social support in both countries might  
22  
23  
24 317 have caused information biases. For instance, expectations regarding social support from  
25  
26  
27 318 relatives could originally have been higher in Japan,[44] leading to overestimation of  
28  
29  
30 319 social isolation levels. Third, regarding the items of the SII, the questions and their  
31  
32  
33 320 response options in the ELSA and JAGES were not exactly the same, nor were they  
34  
35  
36 321 strictly authorised through procedures such as reverse translation and confirming  
37  
38  
39 322 reliability and validity. However, we believe it is certainly meaningful to evaluate social  
40  
41  
42 323 isolation using the same framework. Finally, there were differences in study design in the  
43  
44  
45 324 data from the two cohorts, such as sampling method and follow-up period. We, therefore,  
46  
47  
48 325 made efforts to harmonise the data: those aged  $\leq 64$ , with dementia, and dependent in  
49  
50  
51 326 activities of daily living were excluded from the analysis. Moreover, the ELSA presents  
52  
53  
54 327 nationally representative population data, while the JAGES does not. However, the  
55  
56  
57 328 JAGES sample is representative of areas from a nationwide ageing study in which about  
58  
59  
60



329 one-fifth of all prefectures (nine out of 47) were enrolled. Even so, unlike the ELSA,  
330 analysis in the JAGES does not use sampling weights, which may lead to selection bias.

331

## 332 **CONCLUSION**

333 We examined the association between social isolation and depression onset among older  
334 adults in England and Japan, which have different cultural contexts regarding social  
335 relationships, finding a significant association in both countries. Thus, globally, tackling  
336 social isolation must be prioritised to safeguard the mental health of older adults.  
337 Particularly in Japan, the promotion of interaction with children and social participation  
338 could be key factors in addressing social isolation.

339

## 340 **ACKNOWLEDGEMENTS**

341 We wish to express our deepest gratitude to the members in the Japan Gerontological  
342 Evaluation Study. We would also like to thank everyone who participated in the surveys.

343

## 344 **AUTHORS' CONTRIBUTIONS**

345 All authors contributed to the conception and design of this study. Data collection was  
346 primarily conducted by MS, JA, NC, KO, and KK. Analyses were performed by TN, MS,

1  
2  
3  
4  
5  
6 347 JA, TT, SK, and TI. TN prepared the initial manuscript and MS, JA, NC, TT, SK, TI, KO,  
7  
8  
9 348 and KK significantly contributed to revising it. All authors read and approved the final  
10  
11  
12 349 manuscript.

13  
14  
15 350

### 16 17 18 351 **FUNDING STATEMENT**

19  
20  
21 352 This work was supported by a grant from the Grants-in-Aid for Scientific Research  
22  
23  
24 353 (18KK0057, 19K24277) from the Japan Society for the Promotion of Science. The  
25  
26  
27 354 English Longitudinal Study of Ageing was developed by a team of researchers based at  
28  
29  
30 355 the University College London, NatCen Social Research, and the Institute for Fiscal  
31  
32  
33 356 Studies. The data were collected by NatCen Social Research. The funding is currently  
34  
35  
36 357 provided by the National Institute of Aging (R01AG017644) and a consortium of UK  
37  
38  
39 358 government departments coordinated by the National Institute for Health Research. The  
40  
41  
42 359 Japan Gerontological Evaluation Study is supported by the Ministry of Education, Culture,  
43  
44  
45 360 Sports, Science and Technology-Japan-Supported Program for the Strategic Research  
46  
47  
48 361 Foundation at Private Universities (2009-2013), Japan Society for the Promotion of  
49  
50  
51 362 Science KAKENHI Grant Numbers (JP18390200, JP22330172, JP22390400,  
52  
53  
54 363 JP23243070, JP23590786, JP23790710, JP24390469, JP24530698, JP24683018,  
55  
56  
57 364 JP25253052, JP25870573, JP25870881, JP26285138, JP26882010, JP15H01972),  
58  
59  
60

1  
2  
3  
4  
5  
6 365 Health Labour Sciences Research Grants (H22-Choju-Shitei-008, H24-Junkanki -Ippan-  
7  
8  
9 366 007, H24-Chikyukibo-Ippan-009, H24-Choju-Wakate-009, H25-Kenki-Wakate-015,  
10  
11  
12 367 H25-Choju-Ippan-003, H26-Irryo-Shitei-003 [Fukkou], H26-Choju-Ippan-006, H27-  
13  
14  
15 368 Ninchisyou-Ippan-001, H28-chojuIppan-002, H28-Ninchisho-Ippan-002, H30-Kenki-  
16  
17  
18 369 Ippan-006, H30-Junkankitou-Ippan-004), Japan Agency for Medical Research and  
19  
20  
21 370 Development (JP17dk0110017, JP18dk0110027, JP18ls0110002, JP18le0110009,  
22  
23  
24 371 JP19dk0110034), Research Funding for Longevity Sciences from the National Center for  
25  
26  
27 372 Geriatrics and Gerontology (24-17, 24-23, 29-42, 30-22, 20-40), Open Innovation  
28  
29  
30 373 Platform with Enterprises, Research Institute and Academia (OPERA, JPMJOP1831)  
31  
32  
33 374 from the Japan Science and Technology Agency, and a Research Grant from the Health  
34  
35  
36 375 Science Center Foundation (2019-2020). The funding sources had no role in the study  
37  
38  
39 376 design, data collection and analysis, decision to publish or preparation of the manuscript.  
40  
41  
42 377

#### 45 378 **DATA SHARING STATEMENT**

47  
48 379 For the JAGES, all enquiries are to be addressed to the data management committee via  
49  
50  
51 380 e-mail: [dataadmin.ml@jages.net](mailto:dataadmin.ml@jages.net). All JAGES datasets have ethical or legal restrictions for  
52  
53  
54 381 public deposition because of the inclusion of sensitive information about the human  
55  
56  
57 382 participants. Regarding the ELSA, data are available in an open-access repository at  
58  
59  
60

1  
2  
3  
4  
5  
6 383 <http://www.dataarchive.ac.uk/>.

7  
8  
9 384

10  
11  
12 385 **COMPETING INTERESTS STATEMENT**

13  
14  
15 386 The authors declare no conflict of interest.

16  
17  
18 387

19  
20  
21 388 **REFERENCES**

22  
23  
24 389 1. Townsend P. The family life of old people: an investigation in East London. *Sociol Rev*

25  
26  
27 390 1955;3:175–95. doi: 10.1111/j.1467-954X.1955.tb01052.x

28  
29  
30 391 2. Holt-Lunstad J, Smith TB, Layton JB. Social relationships and mortality risk: a meta-

31  
32  
33 392 analytic review. *PLoS Med* 2010;7:e1000316. doi:10.1371/journal.pmed.1000316

34  
35  
36 393 3. Valtorta NK, Kanaan M, Gilbody S, et al. Loneliness and social isolation as risk factors

37  
38  
39 394 for coronary heart disease and stroke: systematic review and meta-analysis of

40  
41  
42 395 longitudinal observational studies. *Heart* 2016;102:1009–16.

43  
44  
45 396 doi:10.1136/heartjnl-2015-308790

46  
47  
48 397 4. Livingston G, Sommerlad A, Orgeta V, et al. Dementia prevention, intervention, and

49  
50  
51 398 care. *Lancet* 2017;390:2673–734. doi:10.1016/s0140-6736(17)31363-6

52  
53  
54 399 5. Leigh-Hunt N, Bagguley D, Bash K, et al. An overview of systematic reviews on the

55  
56  
57 400 public health consequences of social isolation and loneliness. *Public Health*

- 1  
2  
3  
4  
5  
6 401 2017;152:157–71. doi:10.1016/j.puhe.2017.07.035  
7  
8  
9 402 6. Santini ZI, Koyanagi A, Tyrovolas S, et al. The association between social relationships  
10  
11  
12 403 and depression: a systematic review. *J Affect Disord* 2015;175:53–65.  
13  
14  
15 404 doi:10.1016/j.jad.2014.12.049  
16  
17  
18 405 7. Kawachi I, Berkman LF. Social ties and mental health. *J Urban Health* 2001;78:458–  
19  
20  
21 406 67. doi:10.1093/jurban/78.3.458  
22  
23  
24 407 8. Sivertsen H, Bjorklof GH, Engedal K, et al. Depression and quality of life in older  
25  
26  
27 408 persons: a review. *Dement Geriatr Cogn Disord* 2015;40:311–39.  
28  
29  
30 409 doi:10.1159/000437299  
31  
32  
33 410 9. Chen CM, Mullan J, Su YY, et al. The longitudinal relationship between depressive  
34  
35  
36 411 symptoms and disability for older adults: a population-based study. *J Gerontol A*  
37  
38  
39 412 *Biol Sci Med Sci* 2012;67:1059–67. doi:10.1093/gerona/gls074  
40  
41  
42 413 10. World Federation for Mental Health. Depression: a global crisis. World Mental Health  
43  
44  
45 414 Day, October 10 2012. 2012.  
46  
47  
48 415 [https://www.who.int/mental\\_health/management/depression/wfmh\\_paper\\_depre](https://www.who.int/mental_health/management/depression/wfmh_paper_depre)  
49  
50  
51 416 [ssion\\_wmhd\\_2012.pdf](https://www.who.int/mental_health/management/depression/wfmh_paper_depression_wmhd_2012.pdf) (accessed 7 Feb 2020).  
52  
53  
54 417 11. Saito M, Aida J, Cable N, et al. Cross-national comparison of social isolation and  
55  
56  
57 418 mortality among older adults: a 10-year follow-up study in Japan and England.  
58  
59  
60

- 1  
2  
3  
4  
5  
6 419 *Geriatr Gerontol Int* 2020 doi: 10.1111/ggi.14118  
7  
8  
9 420 12. HM Government. A connected society: a strategy for tackling loneliness – laying the  
10  
11  
12 421 foundations for change. 2018.  
13  
14  
15 422 [https://assets.publishing.service.gov.uk/government/uploads/system/uploads/atta](https://assets.publishing.service.gov.uk/government/uploads/system/uploads/attachment_data/file/750909/6.4882_DCMS_Loneliness_Strategy_web_Update.pdf)  
16  
17  
18 423 [chment\\_data/file/750909/6.4882\\_DCMS\\_Loneliness\\_Strategy\\_web\\_Update.pdf](https://assets.publishing.service.gov.uk/government/uploads/system/uploads/attachment_data/file/750909/6.4882_DCMS_Loneliness_Strategy_web_Update.pdf)  
19  
20  
21 424 (accessed 12 Oct 2020).  
22  
23  
24 425 13. Muramatsu N, Akiyama H. Japan: super-aging society preparing for the future.  
25  
26  
27 426 *Gerontologist* 2011;51:425–32. doi: 10.1093/geront/gnr067  
28  
29  
30 427 14. National Institute of Population and Social Security Research. Household projections  
31  
32  
33 428 for Japan. [http://www.ipss.go.jp/pp-ajsetai/e/hprj\\_98/hprj\\_98.html](http://www.ipss.go.jp/pp-ajsetai/e/hprj_98/hprj_98.html) (accessed 12  
34  
35  
36 429 Oct 2020).  
37  
38  
39 430 15. Murayama H, Shibui Y, Fukuda Y, et al. A new crisis in Japan-social isolation in old  
40  
41  
42 431 age. *J Am Geriatr Soc* 2011;59:2160–2. doi:10.1111/j.1532-5415.2011.03640.x  
43  
44  
45 432 16. Organisation for Economic Co-operation and Development. Society at a Glance:  
46  
47  
48 433 OECD Social Indicators. Paris: OECD Publishing 2005.  
49  
50  
51 434 17. Takagi E, Silverstein M. Intergenerational coresidence of the Japanese elderly:are  
52  
53  
54 435 cultural norms proactive or reactive? *Research on Aging* 2006;28:473–92. doi:  
55  
56  
57 436 10.1177/0164027506287788  
58  
59  
60

- 1  
2  
3  
4  
5  
6  
7 437 18. Knight B, Robinson Shurgot G, Longmire C, et al. Cross cultural issues in caregiving  
8  
9 438 for persons with dementia: do familism values reduce burden and distress? *Aging*  
10  
11  
12 439 *International* 2002;27:70–94. doi: 10.1007/s12126-003-1003-y  
13  
14  
15 440 19. Knight BG, Sayegh P. Cultural values and caregiving: the updated sociocultural stress  
16  
17  
18 441 and coping model. *J Gerontol B Psychol Sci Soc Sci* 2009;65B(1):5–13. doi:  
19  
20  
21 442 10.1093/geronb/gbp096 %  
22  
23  
24 443 20. Cabinet Office. International Comparative Survey on the Life and Awareness of the  
25  
26  
27 444 Elderly in 2015. Cabinet Office, Tokyo. 2015.  
28  
29  
30 445 <https://www8.cao.go.jp/kourei/ishiki/h27/zentai/index.html> (accessed 30 Jan  
31  
32  
33 446 2021).  
34  
35  
36 447 21. Aida J, Cable N, Zaninotto P, et al. Social and behavioural determinants of the  
37  
38  
39 448 difference in survival among older adults in Japan and England. *Gerontology*  
40  
41  
42 449 2018;64:266–77. doi:10.1159/000485797  
43  
44  
45 450 22. Sugisawa H, Shibata H, Hougham GW, et al. The impact of social ties on depressive  
46  
47  
48 451 symptoms in U.S. and Japanese elderly. *J Soc Issues* 2003;58:785–804.  
49  
50  
51 452 doi:10.1111/1540-4560.00290  
52  
53  
54 453 23. Cable N, Chandola T, Lallukka T, et al. Country specific associations between social  
55  
56  
57 454 contact and mental health: evidence from civil servant studies across Great Britain,  
58  
59  
60

- 1  
2  
3  
4  
5  
6 455 Japan and Finland. *Public Health* 2016;137:139–46. doi:  
7  
8  
9 456 10.1016/j.puhe.2015.10.013  
10  
11  
12 457 24. Santini ZI, Jose PE, York Cornwell E, et al. Social disconnectedness, perceived  
13  
14  
15 458 isolation, and symptoms of depression and anxiety among older Americans  
16  
17  
18 459 (NSHAP): a longitudinal mediation analysis. *Lancet Public Health* 2020;5:e62–  
19  
20  
21 460 70. doi:10.1016/s2468-2667(19)30230-0  
22  
23  
24 461 25. Mossialos E, Djordjevic A, Osborn R, et al. International profiles of health care  
25  
26  
27 462 systems. 2017.  
28  
29  
30 463 [https://www.commonwealthfund.org/sites/default/files/documents/\\_\\_\\_media\\_fil](https://www.commonwealthfund.org/sites/default/files/documents/___media_files_publications_fund_report_2017_may_mossialos_intl_profiles_v5.pdf)  
31  
32  
33 464 [es\\_publications\\_fund\\_report\\_2017\\_may\\_mossialos\\_intl\\_profiles\\_v5.pdf](https://www.commonwealthfund.org/sites/default/files/documents/___media_files_publications_fund_report_2017_may_mossialos_intl_profiles_v5.pdf)  
34  
35  
36 465 (accessed 12 Oct 2020).  
37  
38  
39 466 26. Kondo K. Progress in aging epidemiology in Japan: the JAGES Project. *J Epidemiol*  
40  
41  
42 467 2016;26:331–6. doi:10.2188/jea.JE20160093  
43  
44  
45 468 27. Steptoe A, Breeze E, Banks J, et al. Cohort profile: the English longitudinal study of  
46  
47  
48 469 ageing. *Int J Epidemiol* 2013;42:1640–8. doi: 10.1093/ije/dys168  
49  
50  
51 470 28. Cable N, Chandola T, Aida J, et al. Can sleep disturbance influence changes in mental  
52  
53  
54 471 health status? Longitudinal research evidence from ageing studies in England and  
55  
56  
57 472 Japan. *Sleep Med* 2017;30:216–21. doi:10.1016/j.sleep.2016.11.017  
58  
59  
60



- 1  
2  
3  
4  
5  
6 473 29. Marmot M, Banks J, Blundell R, et al. Health, Wealth and Lifestyles of the Older  
7  
8  
9 474 Population in England: The 2002 English Longitudinal Study of Ageing. London:  
10  
11  
12 475 Institute for Fiscal Studies 2003.  
13  
14  
15 476 30. Wada T, Ishine M, Kita T, et al. Depression screening of elderly community-dwelling  
16  
17  
18 477 Japanese. *J Am Geriatr Soc* 2003;51:1328–9. doi: 10.1046/j.1532-  
19  
20  
21 478 5415.2003.514207.x  
22  
23  
24 479 31. Gallagher D, Kiss A, Lancot K, et al. Depressive symptoms and cognitive decline: a  
25  
26  
27 480 longitudinal analysis of potentially modifiable risk factors in community dwelling  
28  
29  
30 481 older adults. *J Affect Disord* 2016;190:235–40. doi:10.1016/j.jad.2015.09.046  
31  
32  
33 482 32. Burke WJ, Roccaforte WH, Wengel SP. The short form of the Geriatric Depression  
34  
35  
36 483 Scale: a comparison with the 30-item form. *J Geriatr Psychiatry Neurol*  
37  
38  
39 484 1991;4:173–8. doi:10.1177/089198879100400310  
40  
41  
42 485 33. Ikeda T, Cable N, Saito M, et al. Association between social isolation and smoking in  
43  
44  
45 486 Japan and England. *J Epidemiol* 2020 doi: 10.2188/jea.JE20200138  
46  
47  
48 487 34. Tsuji T, Saito M, Ikeda T, et al. Change in the prevalence of social isolation among  
49  
50  
51 488 the older population from 2010 to 2016: a repeated cross-sectional comparative  
52  
53  
54 489 study of Japan and England. *Arch Gerontol Geriatr* 2020;91:104237. doi:  
55  
56  
57 490 10.1016/j.archger.2020.104237  
58  
59  
60

- 1  
2  
3  
4  
5  
6 491 35. Shankar A, McMunn A, Banks J, et al. Loneliness, social isolation, and behavioral  
7  
8  
9 492 and biological health indicators in older adults. *Health Psychol* 2011;30:377–85.  
10  
11  
12 493 doi:10.1037/a0022826  
13  
14  
15 494 36. White IR, Royston P, Wood AM. Multiple imputation using chained equations: issues  
16  
17  
18 495 and guidance for practice. *Stat Med* 2011;30:377–99. doi:10.1002/sim.4067  
19  
20  
21 496 37. Cruwys T, Dingle GA, Haslam C, et al. Social group memberships protect against  
22  
23  
24 497 future depression, alleviate depression symptoms and prevent depression relapse.  
25  
26  
27 498 *Soc Sci Med* 2013;98:179–86. doi:10.1016/j.socscimed.2013.09.013  
28  
29  
30 499 38. Koizumi Y, Awata S, Kuriyama S, et al. Association between social support and  
31  
32  
33 500 depression status in the elderly: results of a 1-year community-based prospective  
34  
35  
36 501 cohort study in Japan. *Psychiatry Clin Neurosci* 2005;59:563–9.  
37  
38  
39 502 doi:10.1111/j.1440-1819.2005.01415.x  
40  
41  
42 503 39. Smith HJ, Pettigrew TF, Pippin GM, et al. Relative deprivation: a theoretical and  
43  
44  
45 504 meta-analytic review. *Pers Soc Psychol Rev* 2012;16:203–32.  
46  
47  
48 505 doi:10.1177/1088868311430825  
49  
50  
51 506 40. Amemiya A, Saito J, Saito M, et al. Social capital and the improvement in functional  
52  
53  
54 507 ability among older people in Japan: a multilevel survival analysis using JAGES  
55  
56  
57 508 data. *Int J Environ Res Public Health* 2019;16:1310. doi:10.3390/ijerph16081310  
58  
59  
60

- 1  
2  
3  
4  
5  
6 509 41. Stafford M, McMunn A, Zaninotto P, et al. Positive and negative exchanges in social  
7  
8  
9 510 relationships as predictors of depression: evidence from the English Longitudinal  
10  
11  
12 511 Study of Aging. *J Aging Health* 2011;23:607–28.  
13  
14  
15 512 doi:10.1177/0898264310392992  
16  
17  
18 513 42. Koropecj-Cox T. Loneliness and depression in middle and old age: are the childless  
19  
20  
21 514 more vulnerable? *J Gerontol B Psychol Sci Soc Sci* 1998;53:S303–12. doi:  
22  
23  
24 515 10.1093/geronb/53b.6.s303  
25  
26  
27 516 43. Lee GR, Netzer JK, Coward RT. Depression among older parents: the role of  
28  
29  
30 517 intergenerational exchange. *J Marriage Family* 1995;57:823–33. doi:  
31  
32  
33 518 10.2307/353935  
34  
35  
36 519 44. Brown JW, Liang J, Krause N, et al. Transitions in living arrangements among elders  
37  
38  
39 520 in Japan: does health make a difference? *J Gerontol B Psychol Sci Soc Sci*  
40  
41  
42 521 2002;57:S209–20. doi: 10.1093/geronb/57.4.s209  
43  
44  
45 522 45. Takagi E, Silverstein M. Purchasing piety? Coresidence of married children with their  
46  
47  
48 523 older parents in Japan. *Demography* 2011;48:1559–79. doi:10.1007/s13524-011-  
49  
50  
51 524 0053-0  
52  
53  
54 525 46. Tsutsui T, Muramatsu N. Care-needs certification in the long-term care insurance  
55  
56  
57 526 system of Japan. *J Am Geriatr Soc* 2005;53(3):522–7. doi: 10.1111/j.1532-  
58  
59  
60

1  
2  
3  
4  
5  
6 527 5415.2005.53175.x  
7

8  
9 528 47. Takagi D, Kondo K, Kawachi I. Social participation and mental health: moderating  
10  
11  
12 529 effects of gender, social role and rurality. *BMC Public Health* 2013;13:701.  
13  
14  
15 530 doi:10.1186/1471-2458-13-701  
16

17  
18 531 48. Tomioka K, Kurumatani N, Hosoi H. Positive and negative influences of social  
19  
20  
21 532 participation on physical and mental health among community-dwelling elderly  
22  
23  
24 533 aged 65-70 years: a cross-sectional study in Japan. *BMC Geriatr* 2017;17:111.  
25  
26  
27 534 doi: 10.1186/s12877-017-0502-8  
28

29  
30 535 49. Choi E, Han KM, Chang J, et al. Social participation and depressive symptoms in  
31  
32  
33 536 community-dwelling older adults: emotional social support as a mediator. *J*  
34  
35  
36 537 *Psychiatr Res* 2020. doi: 10.1016/j.jpsychires.2020.10.043  
37

38  
39 538  
40  
41  
42  
43  
44  
45  
46  
47  
48  
49  
50  
51  
52  
53  
54  
55  
56  
57  
58  
59  
60

**Supplementary Table 1. Association between social isolation and depression onset, by complete case analysis**

|                                |                        | ELSA                       |                               | JAGES                      |                            |
|--------------------------------|------------------------|----------------------------|-------------------------------|----------------------------|----------------------------|
|                                |                        | Crude OR (95% CI)          | Adjusted OR (95% CI)          | Crude OR (95% CI)          | Adjusted OR (95% CI)       |
| Social Isolation Index score   | 0                      | 1.00 (reference)           | 1.00 (reference)              | 1.00 (reference)           | 1.00 (reference)           |
|                                | 1                      | 1.92** (1.19–3.10)         | 1.56 <sup>†</sup> (0.94–2.60) | 1.14 (0.94–1.39)           | 1.11 (0.87–1.41)           |
|                                | 2                      | 2.15** (1.28–3.62)         | 1.71 <sup>†</sup> (0.98–2.99) | 1.32** (1.09–1.60)         | 1.20 (0.95–1.51)           |
|                                | 3                      | 3.19*** (1.73–5.90)        | 2.50** (1.27–4.90)            | 1.57*** (1.30–1.90)        | 1.30* (1.03–1.64)          |
|                                | ≥ 4                    | 3.85** (1.46–10.18)        | 5.17** (1.83–14.66)           | 2.26*** (1.83–2.79)        | 1.47** (1.13–1.91)         |
|                                |                        | <i>p</i> for trend < 0.001 | <i>p</i> for trend < 0.001    | <i>p</i> for trend < 0.001 | <i>p</i> for trend < 0.001 |
| Age (years)                    | 65–69                  |                            | 1.00 (reference)              |                            | 1.00 (reference)           |
|                                | 70–74                  |                            | 1.37 (0.83–2.25)              |                            | 1.16** (1.05–1.30)         |
|                                | 75–79                  |                            | 1.24 (0.71–2.14)              |                            | 1.31*** (1.16–1.48)        |
|                                | 80–84                  |                            | 1.66 <sup>†</sup> (0.92–2.99) |                            | 1.60*** (1.37–1.88)        |
|                                | ≥ 85                   |                            | 0.97 (0.45–2.09)              |                            | 1.79*** (1.39–2.30)        |
| Gender                         | Male                   |                            | 1.00 (reference)              |                            | 1.00 (reference)           |
|                                | Female                 |                            | 1.58* (1.07–2.34)             |                            | 1.00 (0.90–1.11)           |
| Educational attainment (years) | < 15                   |                            | 1.00 (reference)              |                            | 1.00 (reference)           |
|                                | 16–18                  |                            | 1.05 (0.68–1.60)              |                            | 0.81*** (0.74–0.89)        |
|                                | ≥ 19                   |                            | 1.30 (0.70–2.41)              |                            | 0.68*** (0.60–0.78)        |
| Household equivalised income   | 1st quintile (lowest)  |                            | 1.00 (reference)              |                            | 1.00 (reference)           |
|                                | 2nd quintile           |                            | 0.70 (0.40–0.21)              |                            | 0.95 (0.83–1.09)           |
|                                | 3rd quintile           |                            | 1.11 (0.66–1.87)              |                            | 0.76*** (0.67–0.87)        |
|                                | 4th quintile           |                            | 0.82 (0.45–1.50)              |                            | 0.67*** (0.57–0.79)        |
|                                | 5th quintile (highest) |                            | 0.84 (0.42–1.68)              |                            | 0.65*** (0.56–0.76)        |

1  
2  
3  
4  
5  
6  
7  
8  
9  
10  
11  
12  
13  
14  
15  
16  
17  
18  
19  
20  
21  
22  
23  
24  
25  
26  
27  
28  
29  
30  
31  
32  
33  
34  
35  
36  
37  
38  
39  
40  
41  
42  
43  
44  
45  
46

|                         |            |                     |                     |
|-------------------------|------------|---------------------|---------------------|
| Cancer                  | No         | 1.00 (reference)    | 1.00 (reference)    |
|                         | Yes        | 0.95 (0.32–2.81)    | 1.16 (0.93–1.43)    |
| Heart disease           | No         | 1.00 (reference)    | 1.00 (reference)    |
|                         | Yes        | 1.13 (0.67–1.92)    | 1.20 (1.05–1.37)    |
| Stroke                  | No         | 1.00 (reference)    | 1.00 (reference)    |
|                         | Yes        | 1.3 (0.56–3.02)     | 1.18 (0.80–1.73)    |
| Self-rated health       | Good       | 1.00 (reference)    | 1.00 (reference)    |
|                         | Poor       | 1.71* (1.13–2.59)   | 1.63*** (1.44–1.85) |
| CES-D score at baseline |            | 1.90*** (1.60–2.25) |                     |
| GDS score at baseline   |            |                     | 1.92*** (1.86–1.99) |
| Smoking                 | Never/past | 1.00 (reference)    | 1.00 (reference)    |
|                         | Current    | 0.76 (0.76–1.56)    | 1.29*** (1.12–1.48) |
| Drinking                | Never/past | 1.00 (reference)    | 1.00 (reference)    |
|                         | Current    | 1.41 (0.81 – 2.44)  | 1.02 (0.93 – 1.13)  |

\*,  $p < 0.05$ ; \*\*,  $p < 0.01$ ; \*\*\*,  $p < 0.001$ ; †,  $p < 0.1$

ELSA, English Longitudinal Study of Ageing; JAGES, Japan Gerontological Evaluation Study; CES-D, Center for Epidemiologic Studies Depression Scale; CI, confidence interval; GDS, Geriatric Depression Scale; OR, odds ratio

**Supplementary Table 2. Association between sub-components of social isolation and depression onset, by complete case analysis**

|                                                   |  | ELSA                   |                      | JAGES               |                      |
|---------------------------------------------------|--|------------------------|----------------------|---------------------|----------------------|
|                                                   |  | Crude OR (95% CI)      | Adjusted OR (95% CI) | Crude OR (95% CI)   | Adjusted OR (95% CI) |
| Social Isolation Index sub-components (ref; none) |  |                        |                      |                     |                      |
| Unmarried or living alone                         |  | 1.91*** (1.34–2.72)    | 1.27 (0.84–1.93)     | 1.33*** (1.18–1.49) | 1.02 (0.88–1.19)     |
| Poor interaction with children                    |  | 1.08 (0.68–1.74)       | 1.51 (0.91–2.50)     | 1.01 (0.98–1.10)    | 1.13* (1.02–1.25)    |
| Poor interaction with relatives                   |  | 1.25 (0.83–1.90)       | 1.33 (0.85–2.08)     | 1.05 (0.97–1.13)    | 0.98 (0.90–1.08)     |
| Poor interaction with friends                     |  | 1.19 (0.78–1.80)       | 1.21 (0.78–1.87)     | 1.23 (1.14–1.33)    | 1.11* (1.01–1.22)    |
| No social participation                           |  | 1.54* (1.08–2.19)      | 1.46† (0.98–2.16)    | 1.70 (1.56–1.86)    | 1.22*** (1.09–1.36)  |
| Age (years)                                       |  |                        |                      |                     |                      |
|                                                   |  | 65–69                  | 1.00 (reference)     |                     | 1.00 (reference)     |
|                                                   |  | 70–74                  | 1.37 (0.83–2.25)     |                     | 1.17** (1.05–1.30)   |
|                                                   |  | 75–79                  | 1.25 (0.72–2.17)     |                     | 1.31*** (1.16–1.49)  |
|                                                   |  | 80–84                  | 1.68† (0.92–3.04)    |                     | 1.60*** (1.36–1.88)  |
|                                                   |  | ≥ 85                   | 1.00 (0.46–2.21)     |                     | 1.78*** (1.38–2.30)  |
| Gender                                            |  | Male                   | 1.00 (reference)     |                     | 1.00 (reference)     |
|                                                   |  | Female                 | 1.59* (1.07–2.37)    |                     | 1.00 (0.89–1.11)     |
| Educational attainment (years)                    |  | < 15                   | 1.00 (reference)     |                     | 1.00 (reference)     |
|                                                   |  | 10–12                  | 1.04 (0.67–1.60)     |                     | 0.81*** (0.74–0.90)  |
|                                                   |  | ≥ 19                   | 1.31 (0.70–2.46)     |                     | 0.69*** (0.61–0.78)  |
| Household equivalised income                      |  | 1st quintile (lowest)  | 1.00 (reference)     |                     | 1.00 (reference)     |
|                                                   |  | 2nd quintile           | 0.71 (0.41–1.23)     |                     | 0.95 (0.83–1.09)     |
|                                                   |  | 3rd quintile           | 1.13 (0.67–1.93)     |                     | 0.76*** (0.67–0.86)  |
|                                                   |  | 4th quintile           | 0.83 (0.45–1.52)     |                     | 0.67*** (0.57–0.79)  |
|                                                   |  | 5th quintile (highest) | 0.85 (0.42–1.71)     |                     | 0.66*** (0.57–0.76)  |
| Cancer                                            |  | No                     | 1.00 (reference)     |                     | 1.00 (reference)     |
|                                                   |  | Yes                    | 0.95 (0.32–2.81)     |                     | 1.15 (0.93–1.43)     |

1  
2  
3  
4  
5  
6  
7  
8  
9  
10  
11  
12  
13  
14  
15  
16  
17  
18  
19  
20  
21  
22  
23  
24  
25  
26  
27  
28  
29  
30  
31  
32  
33  
34  
35  
36  
37  
38  
39  
40  
41  
42  
43  
44  
45  
46

|                         |            |                     |                     |
|-------------------------|------------|---------------------|---------------------|
| Heart disease           | No         | 1.00 (reference)    | 1.00 (reference)    |
|                         | Yes        | 1.16 (0.69–1.96)    | 1.20** (1.05–1.37)  |
| Stroke                  | No         | 1.00 (reference)    | 1.00 (reference)    |
|                         | Yes        | 1.28 (0.55–2.99)    | 1.18 (0.80–1.73)    |
| Self-rated health       | Good       | 1.00 (reference)    | 1.00 (reference)    |
|                         | Poor       | 1.71* (1.13–2.58)   | 1.62*** (1.43–1.83) |
| CES-D score at baseline |            | 1.89*** (1.59–2.25) | 1.00 (reference)    |
| GDS score at baseline   |            |                     | 1.92*** (1.85–1.99) |
| Smoking                 | Never/past | 1.00 (reference)    | 1.00 (reference)    |
|                         | Current    | 0.74 (0.36–1.53)    | 1.29*** (1.13–1.48) |
| Drinking                | Never/past | 1.00 (reference)    | 1.00 (reference)    |
|                         | Current    | 1.39 (0.80–2.40)    | 1.03 (0.93–1.14)    |

---

\*,  $p < 0.05$ ; \*\*,  $p < 0.01$ ; \*\*\*,  $p < 0.001$ ; †,  $p < 0.1$   
 ELSA, English Longitudinal Study of Ageing; JAGES, Japan Gerontological Evaluation Study; CES-D, Center for Epidemiologic Studies Depression Scale; CI, confidence interval; GDS, Geriatric Depression Scale; OR, odds ratio



STROBE Statement—Checklist of items that should be included in reports of *cohort studies*

|                              | Item No | Recommendation                                                                                                                                                                                                                                                                                                         | Page No                                                           |
|------------------------------|---------|------------------------------------------------------------------------------------------------------------------------------------------------------------------------------------------------------------------------------------------------------------------------------------------------------------------------|-------------------------------------------------------------------|
| <b>Title and abstract</b>    | 1       | (a) Indicate the study's design with a commonly used term in the title or the abstract<br>(b) Provide in the abstract an informative and balanced summary of what was done and what was found                                                                                                                          | 1, 3<br>3-4                                                       |
| <b>Introduction</b>          |         |                                                                                                                                                                                                                                                                                                                        |                                                                   |
| Background/rationale         | 2       | Explain the scientific background and rationale for the investigation being reported                                                                                                                                                                                                                                   | 6-9                                                               |
| Objectives                   | 3       | State specific objectives, including any prespecified hypotheses                                                                                                                                                                                                                                                       | 9                                                                 |
| <b>Methods</b>               |         |                                                                                                                                                                                                                                                                                                                        |                                                                   |
| Study design                 | 4       | Present key elements of study design early in the paper                                                                                                                                                                                                                                                                | 9                                                                 |
| Setting                      | 5       | Describe the setting, locations, and relevant dates, including periods of recruitment, exposure, follow-up, and data collection                                                                                                                                                                                        | 9-10                                                              |
| Participants                 | 6       | (a) Give the eligibility criteria, and the sources and methods of selection of participants. Describe methods of follow-up<br>(b) For matched studies, give matching criteria and number of exposed and unexposed                                                                                                      | 9-10<br>Not applicable                                            |
| Variables                    | 7       | Clearly define all outcomes, exposures, predictors, potential confounders, and effect modifiers. Give diagnostic criteria, if applicable                                                                                                                                                                               | 10-11                                                             |
| Data sources/<br>measurement | 8*      | For each variable of interest, give sources of data and details of methods of assessment (measurement). Describe comparability of assessment methods if there is more than one group                                                                                                                                   | 10-11                                                             |
| Bias                         | 9       | Describe any efforts to address potential sources of bias                                                                                                                                                                                                                                                              | 12                                                                |
| Study size                   | 10      | Explain how the study size was arrived at                                                                                                                                                                                                                                                                              | Not applicable                                                    |
| Quantitative variables       | 11      | Explain how quantitative variables were handled in the analyses. If applicable, describe which groupings were chosen and why                                                                                                                                                                                           | 10-11                                                             |
| Statistical methods          | 12      | (a) Describe all statistical methods, including those used to control for confounding<br>(b) Describe any methods used to examine subgroups and interactions<br>(c) Explain how missing data were addressed<br>(d) If applicable, explain how loss to follow-up was addressed<br>(e) Describe any sensitivity analyses | 11-12<br>Not applicable<br>12<br>Not applicable<br>Not applicable |
| <b>Results</b>               |         |                                                                                                                                                                                                                                                                                                                        |                                                                   |
| Participants                 | 13*     | (a) Report numbers of individuals at each stage of study—eg numbers potentially eligible, examined for eligibility, confirmed eligible, included in the study, completing follow-up, and analysed<br>(b) Give reasons for non-participation at each stage<br>(c) Consider use of a flow diagram                        | 13<br>Not applicable<br>Not applicable                            |
| Descriptive data             | 14*     | (a) Give characteristics of study participants (eg demographic, clinical, social) and information on exposures and potential confounders<br>(b) Indicate number of participants with missing data for each variable of interest<br>(c) Summarise follow-up time (eg, average and total amount)                         | 13-14<br>15-16<br>10                                              |
| Outcome data                 | 15*     | Report numbers of outcome events or summary measures over time                                                                                                                                                                                                                                                         | 17-18                                                             |

|                                 |                          |    |                                                                                                                                                                                                                                                                                                                                                                                                               |                                               |
|---------------------------------|--------------------------|----|---------------------------------------------------------------------------------------------------------------------------------------------------------------------------------------------------------------------------------------------------------------------------------------------------------------------------------------------------------------------------------------------------------------|-----------------------------------------------|
| 1<br>2<br>3<br>4<br>5<br>6<br>7 | Main results             | 16 | (a) Give unadjusted estimates and, if applicable, confounder-adjusted estimates and their precision (eg, 95% confidence interval). Make clear which confounders were adjusted for and why they were included<br>(b) Report category boundaries when continuous variables were categorized<br>(c) If relevant, consider translating estimates of relative risk into absolute risk for a meaningful time period | 19-21<br><br>Not applicable<br>Not applicable |
| 8<br>9                          | Other analyses           | 17 | Report other analyses done—eg analyses of subgroups and interactions, and sensitivity analyses                                                                                                                                                                                                                                                                                                                | Supplementary 1, 2                            |
| 10                              | <b>Discussion</b>        |    |                                                                                                                                                                                                                                                                                                                                                                                                               |                                               |
| 11                              | Key results              | 18 | Summarise key results with reference to study objectives                                                                                                                                                                                                                                                                                                                                                      | 23                                            |
| 12<br>13<br>14                  | Limitations              | 19 | Discuss limitations of the study, taking into account sources of potential bias or imprecision. Discuss both direction and magnitude of any potential bias                                                                                                                                                                                                                                                    | 26-28                                         |
| 15<br>16<br>17<br>18            | Interpretation           | 20 | Give a cautious overall interpretation of results considering objectives, limitations, multiplicity of analyses, results from similar studies, and other relevant evidence                                                                                                                                                                                                                                    | 23-26                                         |
| 19<br>20                        | Generalisability         | 21 | Discuss the generalisability (external validity) of the study results                                                                                                                                                                                                                                                                                                                                         | 24-25                                         |
| 21                              | <b>Other information</b> |    |                                                                                                                                                                                                                                                                                                                                                                                                               |                                               |
| 22<br>23<br>24                  | Funding                  | 22 | Give the source of funding and the role of the funders for the present study and, if applicable, for the original study on which the present article is based                                                                                                                                                                                                                                                 | 29-30                                         |

\*Give information separately for exposed and unexposed groups.

**Note:** An Explanation and Elaboration article discusses each checklist item and gives methodological background and published examples of transparent reporting. The STROBE checklist is best used in conjunction with this article (freely available on the Web sites of PLoS Medicine at <http://www.plosmedicine.org/>, Annals of Internal Medicine at <http://www.annals.org/>, and Epidemiology at <http://www.epidem.com/>). Information on the STROBE Initiative is available at <http://www.strobe-statement.org>.

# BMJ Open

## Association between social isolation and depression onset among older adults: A cross-national longitudinal study in England and Japan

|                                 |                                                                                                                                                                                                                                                                                                                                                                                                                                                                                                                                                                                                                                                                                                                                                                                                                                                                                                                                                                                                                                                                                                                                                                                                                                                                                                                                                                                                                                                                                                                                                                                                                                                     |
|---------------------------------|-----------------------------------------------------------------------------------------------------------------------------------------------------------------------------------------------------------------------------------------------------------------------------------------------------------------------------------------------------------------------------------------------------------------------------------------------------------------------------------------------------------------------------------------------------------------------------------------------------------------------------------------------------------------------------------------------------------------------------------------------------------------------------------------------------------------------------------------------------------------------------------------------------------------------------------------------------------------------------------------------------------------------------------------------------------------------------------------------------------------------------------------------------------------------------------------------------------------------------------------------------------------------------------------------------------------------------------------------------------------------------------------------------------------------------------------------------------------------------------------------------------------------------------------------------------------------------------------------------------------------------------------------------|
| Journal:                        | <i>BMJ Open</i>                                                                                                                                                                                                                                                                                                                                                                                                                                                                                                                                                                                                                                                                                                                                                                                                                                                                                                                                                                                                                                                                                                                                                                                                                                                                                                                                                                                                                                                                                                                                                                                                                                     |
| Manuscript ID                   | bmjopen-2020-045834.R2                                                                                                                                                                                                                                                                                                                                                                                                                                                                                                                                                                                                                                                                                                                                                                                                                                                                                                                                                                                                                                                                                                                                                                                                                                                                                                                                                                                                                                                                                                                                                                                                                              |
| Article Type:                   | Original research                                                                                                                                                                                                                                                                                                                                                                                                                                                                                                                                                                                                                                                                                                                                                                                                                                                                                                                                                                                                                                                                                                                                                                                                                                                                                                                                                                                                                                                                                                                                                                                                                                   |
| Date Submitted by the Author:   | 19-Feb-2021                                                                                                                                                                                                                                                                                                                                                                                                                                                                                                                                                                                                                                                                                                                                                                                                                                                                                                                                                                                                                                                                                                                                                                                                                                                                                                                                                                                                                                                                                                                                                                                                                                         |
| Complete List of Authors:       | <p>Noguchi, Taiji; National Center for Geriatrics and Gerontology, Department of Social Science, Center for Gerontology and Social Science; Nagoya City University Graduate School of Medical Sciences and Medical School, Department of Public Health</p> <p>Saito, Masashige; Nihon Fukushi University, Faculty of Social Welfare</p> <p>Aida, Jun; Tokyo Medical and Dental University Graduate School of Medical and Dental Sciences, Department of Oral Health Promotion; Tohoku University, Division for Regional Community Development, Liaison Center for Innovative Dentistry</p> <p>Cable, Noriko; University College London, Epidemiology and Public Health</p> <p>Tsuji, Taishi; University of Tsukuba, Faculty of Health and Sport Sciences; Chiba University, Department of Social Preventive Medical Sciences, Center for Preventive Medical Sciences</p> <p>Koyama, Shihoko; Osaka International Cancer Institute, Cancer Control Center</p> <p>Ikeda, Takaaki; Yamagata University Faculty of Medicine Graduate School of Medical Science, Department of Health Policy Science; Tohoku University Graduate School of Dentistry School of Dentistry, Department of International and Community Oral Health</p> <p>Osaka, Ken; Tohoku University Graduate School of Dentistry School of Dentistry, Department of International and Community Oral Health</p> <p>Kondo, Katsunori; Chiba University, Department of Social Preventive Medical Sciences, Center for Preventive Medical Sciences; National Center for Geriatrics and Gerontology, Department of Gerontological Evaluation, Center for Gerontology and Social Science</p> |
| <b>Primary Subject Heading</b>: | Epidemiology                                                                                                                                                                                                                                                                                                                                                                                                                                                                                                                                                                                                                                                                                                                                                                                                                                                                                                                                                                                                                                                                                                                                                                                                                                                                                                                                                                                                                                                                                                                                                                                                                                        |
| Secondary Subject Heading:      | Mental health, Geriatric medicine, Public health                                                                                                                                                                                                                                                                                                                                                                                                                                                                                                                                                                                                                                                                                                                                                                                                                                                                                                                                                                                                                                                                                                                                                                                                                                                                                                                                                                                                                                                                                                                                                                                                    |
| Keywords:                       | EPIDEMIOLOGY, GERIATRIC MEDICINE, Old age psychiatry < PSYCHIATRY, PUBLIC HEALTH, SOCIAL MEDICINE                                                                                                                                                                                                                                                                                                                                                                                                                                                                                                                                                                                                                                                                                                                                                                                                                                                                                                                                                                                                                                                                                                                                                                                                                                                                                                                                                                                                                                                                                                                                                   |
|                                 |                                                                                                                                                                                                                                                                                                                                                                                                                                                                                                                                                                                                                                                                                                                                                                                                                                                                                                                                                                                                                                                                                                                                                                                                                                                                                                                                                                                                                                                                                                                                                                                                                                                     |

1  
2  
3  
4  
5  
6  
7  
8  
9  
10  
11  
12  
13  
14  
15  
16  
17  
18  
19  
20  
21  
22  
23  
24  
25  
26  
27  
28  
29  
30  
31  
32  
33  
34  
35  
36  
37  
38  
39  
40  
41  
42  
43  
44  
45  
46  
47  
48  
49  
50  
51  
52  
53  
54  
55  
56  
57  
58  
59  
60





I, the Submitting Author has the right to grant and does grant on behalf of all authors of the Work (as defined in the below author licence), an exclusive licence and/or a non-exclusive licence for contributions from authors who are: i) UK Crown employees; ii) where BMJ has agreed a CC-BY licence shall apply, and/or iii) in accordance with the terms applicable for US Federal Government officers or employees acting as part of their official duties; on a worldwide, perpetual, irrevocable, royalty-free basis to BMJ Publishing Group Ltd ("BMJ") its licensees and where the relevant Journal is co-owned by BMJ to the co-owners of the Journal, to publish the Work in this journal and any other BMJ products and to exploit all rights, as set out in our [licence](#).

The Submitting Author accepts and understands that any supply made under these terms is made by BMJ to the Submitting Author unless you are acting as an employee on behalf of your employer or a postgraduate student of an affiliated institution which is paying any applicable article publishing charge ("APC") for Open Access articles. Where the Submitting Author wishes to make the Work available on an Open Access basis (and intends to pay the relevant APC), the terms of reuse of such Open Access shall be governed by a Creative Commons licence – details of these licences and which [Creative Commons](#) licence will apply to this Work are set out in our licence referred to above.

Other than as permitted in any relevant BMJ Author's Self Archiving Policies, I confirm this Work has not been accepted for publication elsewhere, is not being considered for publication elsewhere and does not duplicate material already published. I confirm all authors consent to publication of this Work and authorise the granting of this licence.

## Original research

### Title

Association between social isolation and depression onset among older adults: A cross-national longitudinal study in England and Japan

Taiji Noguchi<sup>1,2\*</sup>, Masashige Saito<sup>3</sup>, Jun Aida<sup>4,5</sup>, Noriko Cable<sup>6</sup>, Taishi Tsuji<sup>7,8</sup>, Shihoko Koyama<sup>9</sup>, Takaaki Ikeda<sup>10,11</sup>, Ken Osaka<sup>11</sup>, Katsunori Kondo<sup>1,8</sup>

<sup>1</sup>Center for Gerontology and Social Science, National Center for Geriatrics and Gerontology, Aichi, Japan

<sup>2</sup>Department of Public Health, Nagoya City University Graduate School of Medical Sciences, Aichi, Japan

<sup>3</sup>Faculty of Social Welfare, Nihon Fukushi University, Aichi, Japan

<sup>4</sup>Department of Oral Health Promotion, Graduate School of Medical and Dental Sciences, Tokyo Medical and Dental University, Tokyo, Japan

<sup>5</sup>Division for Regional Community Development, Liaison Center for Innovative Dentistry, Graduate School of Dentistry, Tohoku University, Miyagi, Japan

<sup>6</sup>Department of Epidemiology and Public Health, University College London, London,

1  
2  
3  
4  
5  
6 UK

7  
8  
9 <sup>7</sup>Faculty of Health and Sport Sciences, University of Tsukuba, Tokyo, Japan

10  
11  
12 <sup>8</sup>Department of Social Preventive Medical Sciences, Center for Preventive Medical  
13  
14  
15 Sciences, Chiba University, Chiba, Japan

16  
17  
18 <sup>9</sup>Cancer Control Center, Osaka International Cancer Institute, Osaka, Japan

19  
20  
21 <sup>10</sup>Department of Health Policy Science, Graduate School of Medical Science, Yamagata  
22  
23  
24 University, Yamagata, Japan

25  
26  
27 <sup>11</sup>Department of International and Community Oral Health, Tohoku University Graduate  
28  
29  
30 School of Dentistry, Miyagi, Japan

31  
32  
33  
34  
35  
36 **\*Corresponding author**

37  
38  
39 7-430 Morioka, Obu, Aichi 474-8511, Japan

40  
41  
42 E-mail: [noguchi.taiji0415@gmail.com](mailto:noguchi.taiji0415@gmail.com)

43  
44  
45 Tel: +81-562-46-2311; Fax: +81-562-48-7474

46  
47  
48  
49  
50  
51 **Word count:** 3,216 words

1  
2  
3  
4  
5  
6 **1 ABSTRACT**  
7

8  
9 **2 Objective:** Social isolation is a risk factor for depression in older age. However, little is  
10  
11  
12 **3** known regarding whether its impact varies depending on country-specific cultural  
13  
14  
15 **4** contexts regarding social relationships. The present study examined the association of  
16  
17  
18 **5** social isolation with depression onset among older adults in England, which has taken  
19  
20  
21 **6** advanced measures against social isolation, and Japan, a super-aged society with a rapidly  
22  
23  
24 **7** increasing number of socially isolated people.  
25

26  
27 **8 Design:** Prospective longitudinal study.  
28

29  
30 **9 Setting:** We utilised data from two ongoing studies: the English Longitudinal Study of  
31  
32  
33 **10** Ageing (ELSA) and the Japan Gerontological Evaluation Study (JAGES).  
34

35  
36 **11 Participants:** Older adults aged  $\geq 65$  years without depression at baseline were followed  
37  
38  
39 **12** up regarding depression onset for two years (2010/11 to 2012/13) for the ELSA and 2.5  
40  
41  
42 **13** years (2010/11 to 2013) for the JAGES.  
43

44  
45 **14 Primary outcome measure:** Depression was assessed with the Center for Epidemiologic  
46  
47  
48 **15** Studies Depression Scale for the ELSA and Geriatric Depression Scale for the JAGES.  
49  
50  
51 **16** Multivariable logistic regression analysis was performed to evaluate social isolation using  
52  
53  
54 **17** multiple parameters (marital status; interaction with children, relatives, and friends; and  
55  
56  
57 **18** social participation).  
58  
59  
60



1  
2  
3  
4  
5  
6  
7 19 **Results:** The data of 3,331 respondents from the ELSA and 33,127 from the JAGES were  
8  
9 20 analysed. Multivariable logistic regression analysis demonstrated that social isolation was  
10  
11  
12 21 significantly associated with depression onset in both countries. In the ELSA, poor  
13  
14  
15 22 interaction with children was marginally associated with depression onset, while in the  
16  
17  
18 23 JAGES, poor interaction with children and no social participation significantly affected  
19  
20  
21 24 depression onset.

22  
23  
24 25 **Conclusions:** Despite variations in cultural background, social isolation was associated  
25  
26  
27 26 with depression onset in both England and Japan. Addressing social isolation to safeguard  
28  
29  
30 27 older adults' mental health must be globally prioritised.

### 31 32 33 28 34 35 36 29 **Strengths and limitations of this study**

- 37  
38  
39 30 ● This is the first cross-national longitudinal study to examine the association between  
40  
41  
42 31 social isolation and depression onset in England, which has taken advanced measures  
43  
44  
45 32 against social isolation, and Japan, a super-aged society with a rapidly increasing  
46  
47  
48 33 number of socially isolated people.
- 49  
50  
51 34 ● This study included a large sample of over 3,300 individuals from England and  
52  
53  
54 35 33,000 individuals from Japan aged 65 years and older.
- 55  
56  
57 36 ● A limitation of this study is that we cannot make direct comparisons because of  
58  
59  
60

- 1  
2  
3  
4  
5  
6 37 variations in cohort follow-up periods and depression measurement.  
7  
8  
9 38 ● Another limitation is the use of social support for the evaluation of social contact so  
10  
11  
12 39 as to permit the use of the same social isolation assessment scale in both countries.  
13  
14  
15  
16  
17  
18  
19  
20  
21  
22  
23  
24  
25  
26  
27  
28  
29  
30  
31  
32  
33  
34  
35  
36  
37  
38  
39  
40  
41  
42  
43  
44  
45  
46  
47  
48  
49  
50  
51  
52  
53  
54  
55  
56  
57  
58  
59  
60

For peer review only

## 40 INTRODUCTION

41 With population ageing, there is growing worldwide interest in social issues concerning  
42 older adults, including social isolation and the deterioration of physical and mental health.

43 Defined as an objective state in where an individual has few close relationships or limited  
44 contact within a community,[1] social isolation is recognised as a social determinant of  
45 health with relevance to mortality,[2] cardiovascular diseases,[3] dementia,[4] and mental  
46 health.[5, 6] Social isolation is a major risk factor for mental health problems in older  
47 age. Several systematic reviews have demonstrated that social isolation is associated with  
48 depressive symptoms,[5, 6] which, in turn, are correlated with unhealthy behaviours and  
49 reduced access to material resources.[7] Depression, common in later life, is related to  
50 adverse health outcomes such as poor quality of life[8] and functional disability.[9] With  
51 the high current global burden of depression expected to increase further by 2030,[10]  
52 addressing social isolation is an important gerontological issue for protecting mental  
53 health among older adults.

54 The impacts of social isolation on health may vary by country; this could be the  
55 result of differences in the social environments related to social networks within and  
56 outside the family. A recent study of older adults in England and Japan showed that social  
57 isolation is a common risk factor for mortality in both countries, with a greater impact

1  
2  
3  
4  
5  
6 58 observed in England; the results are discussed in terms of possible differences between  
7  
8  
9 59 societies that are highly connected and those that are not.[11] In the United Kingdom  
10  
11  
12 60 (UK), in recognition of the impact of social isolation on health and economic loss, the  
13  
14  
15 61 position of ‘Minister of Loneliness’ was established in 2018, and the country is taking a  
16  
17  
18 62 progressive approach to the elimination of social isolation.[12] In contrast, Japan, now a  
19  
20  
21 63 super-aged society (more than 21% of the population aged 65 or above),[13] is  
22  
23  
24 64 experiencing a rapidly increasing trend in the number of never-married persons and  
25  
26  
27 65 weakening community and neighbourhood relations,[14] leading to a rise in the number  
28  
29  
30 66 of socially isolated individuals.[15] In Japan, the proportion of people who rarely or never  
31  
32  
33 67 spend time with those close to them has been reported to be the highest among  
34  
35  
36 68 Organisation for Economic Co-operation and Development countries. In particular, this  
37  
38  
39 69 figure is much higher than in the UK, which has made advances in tackling social  
40  
41  
42 70 isolation (Japan = 15.3%, UK = 5.0%).[16] Owing to differences in social structures and  
43  
44  
45 71 the contexts surrounding social isolation, the impact of social isolation on depression is  
46  
47  
48 72 expected to vary across countries.

50  
51 73 Furthermore, the health effects of social isolation may differ depending on the  
52  
53  
54 74 cultural context of social relationships. In East Asian countries, including Japan, there is  
55  
56  
57 75 a familial norm based on the traditional culture of filial piety,[17] which is often  
58  
59  
60

1  
2  
3  
4  
5  
6 76 contrasted with individualism in Western countries.[18, 19] Based on this cultural  
7  
8  
9 77 background, Japanese social support networks may be kinship centred, which may be  
10  
11  
12 78 narrower than the types of social networks prevalent in other countries.[20] However,  
13  
14  
15 79 there is a lack of consensus on the health effects of social relationships based on these  
16  
17  
18 80 cultural differences. A previous cross-national study showed that among English men,  
19  
20  
21 81 friendship-based social relationships had a significant impact on longevity, whereas  
22  
23  
24 82 among Japanese men, this impact was associated with family-based social  
25  
26  
27 83 relationships.[21] In contrast, a study of older adults in the United States (US) and Japan  
28  
29  
30 84 demonstrated that while relationships with children were associated with a low level of  
31  
32  
33 85 depression only in Japan, the presence of spouses was important in both countries, but  
34  
35  
36 86 more so in the US.[22] Another comparative study among adults suggested that social  
37  
38  
39 87 contact with friends benefitted women's mental health in the UK but not in Japan.[23]  
40  
41  
42 88 Thus, the family-oriented nature of East Asian societies does not automatically imply the  
43  
44  
45 89 health importance of family-based relationships, and the roles of individual components  
46  
47  
48 90 of social isolation (family, friends, and others) in the mental health of older adults in each  
49  
50  
51 91 country remain controversial.

52  
53  
54 92 As the association between social isolation and depression is often described as  
55  
56  
57 93 bidirectional,[24] longitudinal studies are needed to address temporality. However,  
58  
59  
60

1  
2  
3  
4  
5  
6 94 previous cross-national comparative studies have employed only cross-sectional  
7  
8  
9 95 designs.[22, 23] Therefore, using longitudinal data from both countries, the present study  
10  
11  
12 96 aims to investigate the association of social isolation with depression onset in England,  
13  
14  
15 97 which has taken advanced measures against social isolation, and Japan, a super-aged  
16  
17  
18 98 society with a rapidly increasing number of socially isolated people.  
19  
20

21 99

## 24 100 **METHODS**

### 27 101 **Sample**

30 102 This longitudinal study was conducted using data from two ongoing prospective cohort  
31  
32  
33 103 studies: the English Longitudinal Study of Ageing (ELSA) and the Japan Gerontological  
34  
35  
36 104 Evaluation Study (JAGES). The ELSA targets independent-living older adults aged  $\geq 50$ ,  
37  
38  
39 105 while JAGES participants are community-dwelling individuals aged  $\geq 65$  who are  
40  
41  
42 106 ineligible for long-term healthcare insurance benefits.[25] Details of the ELSA and  
43  
44  
45 107 JAGES can be found elsewhere.[26, 27] For the present analysis, we used the two waves  
46  
47  
48 108 of data that most closely corresponded with the timing of our study: wave 5 (2010/2011)  
49  
50  
51 109 to wave 6 (2012/2013) for the ELSA, and wave 1 (2010/2011) to wave 2 (2013) for the  
52  
53  
54 110 JAGES. We harmonised the data by including older adults aged  $\geq 65$ , independent in  
55  
56  
57 111 activities of daily living, and without self-reported dementia. For analysis, respondents  
58  
59  
60

1  
2  
3  
4  
5  
6 112 who scored above the cut-off point for depression on each measure in the respective  
7  
8  
9 113 cohort at baseline were excluded and we followed up the onset of depression for two years  
10  
11  
12 114 for the ELSA and 2.5 years for the JAGES.  
13  
14

15 115

### 18 116 **Depression**

21 117 Based on a previous cross-national study,[28] depressive symptoms were measured both  
22  
23  
24 118 at baseline and follow-up using eight items from the Center for Epidemiologic Studies  
25  
26  
27 119 Depression Scale (CES-D) in the ELSA[29] and the Geriatric Depression Scale (GDS-  
28  
29  
30 120 15) in the JAGES.[30] To identify possible depressive cases, the CES-D cut-off was  $\geq 4$   
31  
32  
33 121 while that for the GDS-15 was  $\geq 5$ . [31, 32] As previously mentioned, respondents with  
34  
35  
36 122 depression at baseline were excluded and we observed the onset of depression during  
37  
38  
39 123 follow-up.  
40

41  
42 124

### 45 125 **Social isolation**

48 126 Social isolation levels were assessed using a modified version of the Social Isolation  
49  
50  
51 127 Index (SII).[33–35] The index was computed with respondents given a point if they: (1)  
52  
53  
54 128 were unmarried or living alone, (2) had poor interaction with children (did not live with  
55  
56  
57 129 their children or had no one to provide emotional or instrumental social support), (3) had  
58  
59  
60

1  
2  
3  
4  
5  
6 130 poor interaction with relatives (did not have immediate family members providing  
7  
8  
9 131 emotional or instrumental social support), (4) had poor interaction with friends (less than  
10  
11  
12 132 monthly contact or no friends who could provide emotional or instrumental social  
13  
14  
15 133 support), and (5) had no social participation (no participation in any social or religious  
16  
17  
18 134 groups). The total possible score ranged from 0 to 5, with higher scores indicating greater  
19  
20  
21 135 social isolation. The participants were categorised into the following five groups based  
22  
23  
24 136 on their scores: 0, 1, 2, 3, and 4–5 points. We used the total score and the scores of the  
25  
26  
27 137 five sub-components as predictive variables.  
28

29  
30  
31 138

### 32 33 139 **Covariates**

34  
35  
36 140 The covariates included age, gender, educational attainment, household equivalised  
37  
38  
39 141 income, present illness, self-rated health, smoking, and drinking. Age was categorised as  
40  
41  
42 142 65–69, 70–74, 75–79, 80–84, and  $\geq 85$ . Based on the ages of respondents who had  
43  
44  
45 143 completed formal education, the age of final educational attainment was categorised as  $\leq$   
46  
47  
48 144 15 years, 16–18 years, and  $\geq 19$  years. Household equivalised income was classified into  
49  
50  
51 145 quintiles. Present illness was classified as ‘yes’ or ‘no’ for cancer, heart disease, and  
52  
53  
54 146 stroke. Self-rated health was dichotomised as ‘poor’ and ‘good’. Smoking and drinking  
55  
56  
57 147 were dichotomised as ‘never/past’ and ‘current’.  
58  
59  
60



1  
2  
3  
4  
5  
6  
7  
8  
9  
10  
11  
12  
13  
14  
15  
16  
17  
18  
19  
20  
21  
22  
23  
24  
25  
26  
27  
28  
29  
30  
31  
32  
33  
34  
35  
36  
37  
38  
39  
40  
41  
42  
43  
44  
45  
46  
47  
48  
49  
50  
51  
52  
53  
54  
55  
56  
57  
58  
59  
60

148

149 **Statistical analysis**

150 We analysed the ELSA and JAGES data separately because of differences in research  
151 design, especially sampling approaches. A longitudinal weight was applied to account for  
152 survey non-response for the ELSA but not the JAGES as its design does not allow it.  
153 First, we calculated descriptive statistics. Second, we conducted a multivariable logistic  
154 regression analysis to examine the association between SII score and depression onset  
155 and obtained odds ratios (ORs) and 95% confidence intervals (CIs) for depression onset.  
156 Model 1 was not adjusted for covariates while Model 2 was adjusted for all covariates.  
157 Additionally, we analysed the association between SII sub-components and depression  
158 onset, adjusted for all covariates.

159 To mitigate potential biases resulting from missing information, we used the  
160 multiple imputation approach under the missing at random assumption. We generated 20  
161 imputed datasets for the final analysis, which excluded those who met the exclusion  
162 criteria and did not respond to the follow-up surveys, using the multiple imputation by  
163 chained equations procedure and pooled the results using Rubin's rule.[36]

164 The significance level was set at  $p < 0.05$ . We used R (Version 3.5.2 for  
165 Windows) for all statistical analyses.

1  
2  
3  
4  
5  
6  
7 166  
8  
9

10 167 **Ethical considerations**

11  
12 168 The ELSA investigators received ethical approval for all waves of the study from the

13  
14  
15 169 National Health Service Research Ethics Committees under the National Research and

16  
17  
18 170 Ethics Services (MREC/01/2/91). The JAGES protocols were approved by the Ethics

19  
20  
21 171 Committee on the Research of Human Subjects at Nihon Fukushi University (10-05).

22  
23  
24 172

25  
26  
27 173 **Patient and public involvement**

28  
29  
30 174 No patients were involved in the development of the research question, study design, or

31  
32  
33 175 data interpretation.

34  
35  
36 176

37  
38  
39 177 **RESULTS**

40  
41  
42 178 A total of 3,331 ELSA respondents and 33,127 JAGES respondents were included in the

43  
44  
45 179 final analysis. Their baseline characteristics are presented in Table 1. The mean age

46  
47  
48 180 (standard deviation) was 73.6 (6.9) years for the ELSA and 72.4 (5.4) years for the JAGES.

49  
50  
51 181 Regarding SII scores, the ELSA had the largest number of respondents with 0 and 1 points,

52  
53  
54 182 while the JAGES had the largest number with 2 and 3 points. In the ELSA, respondents

55  
56  
57 183 who were older, male, less educated, had a lower income, had heart disease, had poor

1  
2  
3  
4  
5  
6 184 self-rated health, smoked, consumed little alcohol, and had higher baseline depressive  
7  
8  
9 185 symptom scores and higher SII scores. A similar trend was observed in the JAGES, but  
10  
11  
12 186 here, those who consumed more alcohol had higher SII scores.  
13  
14  
15  
16  
17  
18  
19  
20  
21  
22  
23  
24  
25  
26  
27  
28  
29  
30  
31  
32  
33  
34  
35  
36  
37  
38  
39  
40  
41  
42  
43  
44  
45  
46  
47  
48  
49  
50  
51  
52  
53  
54  
55  
56  
57  
58  
59  
60

For peer review only

187 **Table 1. Respondents' baseline characteristics**

|                                     | ELSA <sup>a</sup>                         |          |         |         |        | JAGES                                     |          |          |          |          |
|-------------------------------------|-------------------------------------------|----------|---------|---------|--------|-------------------------------------------|----------|----------|----------|----------|
|                                     | Social Isolation Index score <sup>b</sup> |          |         |         |        | Social Isolation Index score <sup>b</sup> |          |          |          |          |
|                                     | 0                                         | 1        | 2       | 3       | ≥ 4    | 0                                         | 1        | 2        | 3        | ≥ 4      |
|                                     | n = 905                                   | n = 1049 | n = 596 | n = 216 | n = 49 | n = 1402                                  | n = 5981 | n = 9723 | n = 8735 | n = 2176 |
|                                     | (27.2%)                                   | (31.5%)  | (17.9%) | (6.5%)  | (1.5%) | (4.2%)                                    | (18.0%)  | (29.4%)  | (26.4%)  | (6.6%)   |
| Age (years), (%)                    |                                           |          |         |         |        |                                           |          |          |          |          |
| 65–69                               | 41.0                                      | 36.4     | 29.9    | 27.6    | 28.3   | 38.6                                      | 40.5     | 38.0     | 37.0     | 35.8     |
| 70–74                               | 26.1                                      | 28.3     | 28.8    | 29.3    | 23.6   | 32.1                                      | 32.5     | 31.6     | 31.0     | 30.4     |
| 75–79                               | 20.9                                      | 17.5     | 19.3    | 15.8    | 20.4   | 19.2                                      | 18.3     | 19.5     | 20.3     | 21.9     |
| 80–84                               | 9.1                                       | 12.2     | 12.5    | 14.5    | 15.5   | 8.3                                       | 6.7      | 8.3      | 9.0      | 8.8      |
| ≥ 85                                | 2.8                                       | 5.7      | 9.5     | 12.8    | 12.2   | 1.9                                       | 2.0      | 2.6      | 2.7      | 3.1      |
| Gender, (%)                         |                                           |          |         |         |        |                                           |          |          |          |          |
| Men                                 | 50.0                                      | 46.1     | 45.3    | 51.9    | 65.8   | 27.2                                      | 35.1     | 47.0     | 64.4     | 66.1     |
| Women                               | 50.0                                      | 53.9     | 54.7    | 48.1    | 34.2   | 72.8                                      | 64.9     | 53.0     | 35.6     | 33.9     |
| Educational attainment (years), (%) |                                           |          |         |         |        |                                           |          |          |          |          |
| ≤ 15                                | 44.1                                      | 51.3     | 52.3    | 60.9    | 69.6   | 42.9                                      | 38.1     | 37.9     | 38.7     | 48.6     |
| 16–18                               | 35.0                                      | 33.8     | 34.6    | 27.5    | 14.1   | 40.9                                      | 40.8     | 39.3     | 36.8     | 31.1     |
| ≥ 19                                | 17.8                                      | 12.5     | 11.0    | 10.3    | 14.0   | 15.7                                      | 20.4     | 21.8     | 23.3     | 18.5     |
| Missing                             | 3.2                                       | 2.4      | 2.1     | 1.3     | 2.3    | 0.5                                       | 0.7      | 0.9      | 1.2      | 1.8      |
| Household equivalised income, (%)   |                                           |          |         |         |        |                                           |          |          |          |          |
| 1st quintile (lowest)               | 11.4                                      | 18.3     | 23.2    | 31.2    | 14.4   | 7.4                                       | 10.9     | 13.9     | 15.6     | 21.3     |
| 2nd quintile                        | 21.5                                      | 23.7     | 26.1    | 24.1    | 29.6   | 13.2                                      | 13.5     | 15.0     | 15.5     | 16.4     |
| 3rd quintile                        | 20.9                                      | 21.8     | 18.9    | 19.5    | 27.1   | 22.5                                      | 30.6     | 30.3     | 30.6     | 28.0     |
| 4th quintile                        | 21.9                                      | 19.9     | 18.1    | 16.5    | 16.6   | 14.3                                      | 13.6     | 12.7     | 11.3     | 9.5      |
| 5th quintile (highest)              | 22.7                                      | 15.0     | 12.7    | 8.3     | 12.4   | 31.5                                      | 22.5     | 19.2     | 16.8     | 12.9     |
| Missing                             | 1.5                                       | 1.3      | 0.9     | 0.4     | 0.0    | 11.1                                      | 8.9      | 8.9      | 10.2     | 11.9     |
| Cancer, (%)                         |                                           |          |         |         |        |                                           |          |          |          |          |
| No                                  | 96.5                                      | 95.8     | 97.1    | 97.5    | 96.5   | 91.0                                      | 91.2     | 90.8     | 90.1     | 89.7     |
| Yes                                 | 3.4                                       | 4.2      | 2.9     | 2.5     | 3.5    | 3.2                                       | 3.1      | 3.1      | 3.4      | 3.7      |
| Missing                             | 0.1                                       | 0.0      | 0.0     | 0.0     | 0.0    | 5.8                                       | 5.7      | 6.1      | 6.5      | 6.6      |
| Heart disease, (%)                  |                                           |          |         |         |        |                                           |          |          |          |          |
| No                                  | 90.7                                      | 86.9     | 88.4    | 88.3    | 77.3   | 91.0                                      | 91.2     | 90.8     | 90.1     | 89.7     |
| Yes                                 | 9.3                                       | 13.0     | 11.6    | 11.7    | 22.7   | 3.2                                       | 3.1      | 3.1      | 3.4      | 3.7      |
| Missing                             | 0.0                                       | 0.1      | 0.0     | 0.0     | 0.0    | 5.8                                       | 5.7      | 6.1      | 6.5      | 6.6      |

|                              |      |      |      |      |      |      |      |      |      |      |  |
|------------------------------|------|------|------|------|------|------|------|------|------|------|--|
| Stroke, (%)                  |      |      |      |      |      |      |      |      |      |      |  |
| No                           | 96.3 | 96.1 | 97   | 94.4 | 96.6 | 93.3 | 93.6 | 93.1 | 92.5 | 92.2 |  |
| Yes                          | 3.7  | 3.8  | 3.0  | 5.6  | 3.4  | 0.9  | 0.8  | 0.8  | 1.0  | 1.2  |  |
| Missing                      | 0    | 0.1  | 0.0  | 0.0  | 0.0  | 5.8  | 5.7  | 6.1  | 6.5  | 6.6  |  |
| Self-rated health, (%)       |      |      |      |      |      |      |      |      |      |      |  |
| Good                         | 86.4 | 79.9 | 78.8 | 75.4 | 71.3 | 92.0 | 91.7 | 90.6 | 90.2 | 87.2 |  |
| Poor                         | 13.6 | 20.1 | 21.2 | 24.6 | 28.7 | 7.2  | 7.7  | 8.6  | 9.0  | 12.2 |  |
| Missing                      | 0.0  | 0.0  | 0.0  | 0.0  | 0.0  | 0.8  | 0.5  | 0.8  | 0.8  | 0.6  |  |
| Smoking, (%)                 |      |      |      |      |      |      |      |      |      |      |  |
| Never/past                   | 95.5 | 93.1 | 89.8 | 82.9 | 89.4 | 86.4 | 86.1 | 82.9 | 81.5 | 78.4 |  |
| Current                      | 4.5  | 6.9  | 10.2 | 17.1 | 10.6 | 6.4  | 7.4  | 9.5  | 11.3 | 14.2 |  |
| Missing                      | 0.0  | 0.0  | 0.0  | 0.0  | 0.0  | 7.1  | 6.5  | 7.5  | 7.2  | 7.3  |  |
| Drinking, (%)                |      |      |      |      |      |      |      |      |      |      |  |
| Never/past                   | 7.5  | 11.8 | 14.9 | 25.8 | 17.3 | 65.0 | 60.0 | 56.5 | 50.4 | 55.0 |  |
| Current                      | 91.3 | 87.0 | 82.9 | 72.6 | 73.6 | 30.2 | 35.7 | 38.6 | 44.7 | 40.4 |  |
| Missing                      | 1.3  | 1.2  | 2.2  | 1.6  | 9.2  | 4.8  | 4.3  | 4.9  | 4.9  | 4.6  |  |
| CES-D score at baseline, (%) |      |      |      |      |      |      |      |      |      |      |  |
| 0                            | 57.2 | 52.0 | 45.5 | 42.2 | 54.0 |      |      |      |      |      |  |
| 1                            | 27.3 | 26.2 | 28.6 | 31.8 | 25.5 |      |      |      |      |      |  |
| 2                            | 9.8  | 13.8 | 17.1 | 11.9 | 15.1 |      |      |      |      |      |  |
| 3                            | 5.7  | 8.0  | 8.8  | 14.2 | 5.4  |      |      |      |      |      |  |
| GDS score at baseline, (%)   |      |      |      |      |      |      |      |      |      |      |  |
| 0                            |      |      |      |      |      | 20.5 | 30.4 | 29.0 | 26.4 | 24.3 |  |
| 1                            |      |      |      |      |      | 25.5 | 28.4 | 28.6 | 26.9 | 27.0 |  |
| 2                            |      |      |      |      |      | 22.5 | 20.0 | 19.8 | 21.5 | 21.1 |  |
| 3                            |      |      |      |      |      | 17.5 | 13.1 | 13.5 | 14.7 | 15.9 |  |
| 4                            |      |      |      |      |      | 14.1 | 8.1  | 9.1  | 10.5 | 11.7 |  |

188 ELSA, English Longitudinal Study of Ageing; JAGES, Japan Gerontological Evaluation  
 189 Study; CES-D, Center for Epidemiologic Studies Depression Scale; GDS, Geriatric  
 190 Depression Scale

191 <sup>a</sup> ELSA data after sampling weight

192 <sup>b</sup> Missing data: ELSA, n = 516; JAGES, n = 5,110

1  
2  
3  
4  
5  
6 193 Table 2 presents the description of social isolation and depression onset. At  
7  
8  
9 194 follow-up, 201 (6.0%) ELSA respondents and 4,456 (13.5%) JAGES respondents  
10  
11  
12 195 exhibited depression onset. In both studies, higher SII scores were associated with an  
13  
14  
15 196 increased risk of depression onset. Regarding SII sub-components, ELSA respondents  
16  
17  
18 197 who were unmarried or living alone were more likely to have depression, while this was  
19  
20  
21 198 the case with JAGES respondents with no social participation.  
22  
23  
24  
25  
26  
27  
28  
29  
30  
31  
32  
33  
34  
35  
36  
37  
38  
39  
40  
41  
42  
43  
44  
45  
46  
47  
48  
49  
50  
51  
52  
53  
54  
55  
56  
57  
58  
59  
60

199 **Table 2. Description of social isolation status and depression onset**

|                                            |         | ELSA <sup>a</sup>        |                   | JAGES                  |                     |
|--------------------------------------------|---------|--------------------------|-------------------|------------------------|---------------------|
|                                            |         | CES-D score at follow-up |                   | GDS score at follow-up |                     |
|                                            |         | < 4                      | ≥ 4               | < 5                    | ≥ 5                 |
|                                            |         | n = 3130<br>(94.0%)      | n = 201<br>(6.0%) | n = 28671<br>(86.5%)   | n = 4456<br>(13.5%) |
| Social Isolation Index score, (%)          |         |                          |                   |                        |                     |
| 0                                          |         | 27.5                     | 13.5              | 4.4                    | 3.0                 |
| 1                                          |         | 31.2                     | 29.3              | 18.6                   | 14.3                |
| 2                                          |         | 17.9                     | 18.9              | 29.8                   | 26.3                |
| 3                                          |         | 6.5                      | 10.1              | 26.2                   | 27.5                |
| ≥ 4                                        |         | 1.5                      | 2.9               | 6.1                    | 9.3                 |
| Missing                                    |         | 15.4                     | 25.3              | 14.8                   | 19.7                |
| Social Isolation Index sub-components, (%) |         |                          |                   |                        |                     |
| Unmarried or living alone                  | No      | 71.9                     | 58.5              | 88.3                   | 85.2                |
|                                            | Yes     | 28.1                     | 41.5              | 10.2                   | 12.7                |
|                                            | Missing | 0.0                      | 0.0               | 1.4                    | 2.1                 |
| Poor interaction with children             | No      | 81.8                     | 73.4              | 26.6                   | 25.0                |
|                                            | Yes     | 12.5                     | 14.7              | 71.7                   | 72.9                |
|                                            | Missing | 5.7                      | 11.8              | 1.7                    | 2.1                 |
| Poor interaction with relatives            | No      | 76.3                     | 68.1              | 41.1                   | 38.7                |
|                                            | Yes     | 17.3                     | 18.6              | 54.4                   | 56.0                |
|                                            | Missing | 6.4                      | 13.4              | 4.5                    | 5.4                 |
| Poor interaction with friends              | No      | 72.2                     | 66.0              | 37.1                   | 31.2                |
|                                            | Yes     | 18.4                     | 21.6              | 58.2                   | 63.8                |
|                                            | Missing | 9.4                      | 12.4              | 4.6                    | 5.0                 |
| No social participation                    | No      | 61.7                     | 46.3              | 75.0                   | 63.9                |
|                                            | Yes     | 28.4                     | 32.5              | 13.0                   | 20.0                |
|                                            | Missing | 10.0                     | 21.2              | 11.7                   | 16.1                |

200 ELSA, English Longitudinal Study of Ageing; JAGES, Japan Gerontological Evaluation  
 201 Study; CES-D, Center for Epidemiologic Studies Depression Scale; GDS, Geriatric  
 202 Depression Scale

203 <sup>a</sup> ELSA data after sampling weight

1  
2  
3  
4  
5  
6 204 Table 3 depicts the association between SII scores and depression onset.  
7  
8  
9 205 Multivariable analysis showed that higher SII scores were associated with a higher risk  
10  
11  
12 206 of depression onset in both studies after adjusting for all covariates. In the ELSA, the OR  
13  
14  
15 207 of depression onset was significantly higher from a score  $\geq$  one point (OR [95% CI]  
16  
17  
18 208 compared with zero points, one: 1.68 [1.02–2.75], two: 1.77 [1.03–3.05], three: 2.64  
19  
20  
21 209 [1.37–5.12],  $\geq$  four: 4.01 [1.43–11.22],  $p$  for trend = 0.015). In the JAGES, as SII scores  
22  
23  
24 210 increased, the OR of depression onset gradually increased, reaching significance at  $\geq$   
25  
26  
27 211 three points (OR [95% CI] compared with zero points, one: 1.10 [0.89–1.35], two: 1.15  
28  
29  
30 212 [0.94–1.40], three: 1.28 [1.04–1.56],  $\geq$  four: 1.48 [1.18–1.85],  $p$  for trend  $<$  0.001). These  
31  
32  
33 213 results showed almost the same tendency as the complete case analysis without multiple  
34  
35  
36 214 imputation (Supplementary Table 1).  
37  
38  
39  
40  
41  
42  
43  
44  
45  
46  
47  
48  
49  
50  
51  
52  
53  
54  
55  
56  
57  
58  
59  
60



215 **Table 3. Association between social isolation and depression onset: multivariable logistic regression analysis**

|                              | ELSA                       |                                   | JAGES                      |                                   |
|------------------------------|----------------------------|-----------------------------------|----------------------------|-----------------------------------|
|                              | Crude OR (95% CI)          | Adjusted OR (95% CI) <sup>a</sup> | Crude OR (95% CI)          | Adjusted OR (95% CI) <sup>a</sup> |
| Social Isolation Index score |                            |                                   |                            |                                   |
| 0                            | 1.00 (reference)           | 1.00 (reference)                  | 1.00 (reference)           | 1.00 (reference)                  |
| 1                            | 1.92** (1.19–3.10)         | 1.68* (1.02–2.75)                 | 1.14 (0.94–1.39)           | 1.10 (0.89–1.35)                  |
| 2                            | 2.15** (1.28–3.62)         | 1.77* (1.03–3.05)                 | 1.32** (1.09–1.60)         | 1.15 (0.94–1.40)                  |
| 3                            | 3.19*** (1.73–5.90)        | 2.64** (1.37–5.12)                | 1.57*** (1.30–1.90)        | 1.28* (1.04–1.56)                 |
| ≥ 4                          | 3.85** (1.46–10.18)        | 4.01** (1.43–11.22)               | 2.26*** (1.83–2.79)        | 1.48*** (1.18–1.85)               |
|                              | <i>p</i> for trend < 0.001 | <i>p</i> for trend = 0.015        | <i>p</i> for trend < 0.001 | <i>p</i> for trend < 0.001        |

216 \*  $p < 0.05$ ; \*\*  $p < 0.01$ ; \*\*\*  $p < 0.001$ 

217 ELSA, English Longitudinal Study of Ageing; JAGES, Japan Gerontological Evaluation Study; CI, confidence interval; OR, odds ratio

218 <sup>a</sup> Adjusted for age, gender, educational attainment, household equivalised income, present illness (cancer, heart disease, and stroke), self-rated health, smoking, drinking, and depression score at baseline (Center for Epidemiologic Studies Depression Scale for the ELSA and Geriatric Depression Scale for the JAGES).  
219  
220

1  
2  
3  
4  
5  
6 221 Table 4 presents the associations of SII sub-components with depression onset.  
7  
8  
9 222 In the ELSA, sub-components were not significant, although poor interaction with  
10  
11  
12 223 children was marginally significant (OR [95% CI], with ‘none’ as the reference;  
13  
14  
15 224 unmarried or living alone: 1.13 [0.80–1.60], poor interaction with children: 1.55 [1.00–  
16  
17  
18 225 2.41], poor interaction with relatives: 1.24 [0.79–1.94], poor interaction with friends: 1.15  
19  
20  
21 226 [0.77–1.71], no social participation: 1.22 [0.80–1.87]). In the JAGES, poor interaction  
22  
23  
24 227 with children and no social participation were significantly associated with depression  
25  
26  
27 228 onset after adjusting for all covariates (OR [95% CI], with ‘none’ as the reference;  
28  
29  
30 229 unmarried or living alone: 1.11 [1.00–1.24], poor interaction with children: 1.09 [1.01–  
31  
32  
33 230 1.19], poor interaction with relatives: 1.04 [0.96–1.12], poor interaction with friends: 1.03  
34  
35  
36 231 [0.95–1.11], no social participation: 1.28 [1.17–1.40]). These results were similar to those  
37  
38  
39 232 obtained from the complete case analysis (Supplementary Table 2).  
40  
41  
42  
43  
44  
45  
46  
47  
48  
49  
50  
51  
52  
53  
54  
55  
56  
57  
58  
59  
60

233 **Table 4. Association between sub-components of social isolation and depression onset: multivariable logistic regression analysis**

|                                                         | ELSA                              | JAGES                             |
|---------------------------------------------------------|-----------------------------------|-----------------------------------|
|                                                         | Adjusted OR (95% CI) <sup>a</sup> | Adjusted OR (95% CI) <sup>a</sup> |
| Social Isolation Index sub-components (reference: none) |                                   |                                   |
| Unmarried or living alone                               | 1.13 (0.80–1.60)                  | 1.11 <sup>†</sup> (1.00–1.24)     |
| Poor interaction with children                          | 1.55 <sup>†</sup> (1.00–2.41)     | 1.09* (1.01–1.19)                 |
| Poor interaction with relatives                         | 1.24 (0.79–1.94)                  | 1.04 (0.96–1.12)                  |
| Poor interaction with friends                           | 1.15 (0.77–1.71)                  | 1.03 (0.95–1.11)                  |
| No social participation                                 | 1.22 (0.80–1.87)                  | 1.28*** (1.17–1.40)               |

234 \*  $p < 0.05$ ; \*\*  $p < 0.01$ ; \*\*\*  $p < 0.001$ ; <sup>†</sup>  $p < 0.1$ 

235 ELSA, English Longitudinal Study of Ageing; JAGES, Japan Gerontological Evaluation Study; CI, confidence interval; OR, odds ratio

236 <sup>a</sup> Adjusted for age, gender, educational attainment, equivalent income, present illness (cancer, heart disease, and stroke), self-rated health,  
237 smoking, drinking, and depression score at baseline (Center for Epidemiologic Studies Depression Scale for the ELSA and Geriatric  
238 Depression Scale for the JAGES).

1  
2  
3  
4  
5  
6 239 **DISCUSSION**  
7

8  
9 240 To the best of our knowledge, this is the first cross-national longitudinal study of the  
10  
11  
12 241 association of social isolation with depression among older English and Japanese adults.  
13  
14  
15 242 Social isolation was significantly associated with depression onset in both countries. Our  
16  
17  
18 243 results support previous longitudinal findings on social relationships and mental health  
19  
20  
21 244 among older adults in England[37] and Japan.[38] Using data frames that were similar  
22  
23  
24 245 with regard to assessment and covariates, we demonstrated that social isolation is a  
25  
26  
27 246 common risk factor for depression in England and Japan, despite country-specific cultural  
28  
29  
30 247 differences regarding social relationships. Thus, our results suggest that to safeguard the  
31  
32  
33 248 mental health of older adults, addressing social isolation is a global need.  
34  
35

36 249 The association between social isolation and depression was somewhat stronger  
37  
38  
39 250 in England than in Japan. These results are similar to a previous report concerning  
40  
41  
42 251 mortality among older adults in England and Japan.[11] Although we cannot make direct  
43  
44  
45 252 comparisons due to variations in cohort follow-up periods and depression measurement,  
46  
47  
48 253 there are several possible reasons for this pattern of findings. The impact of social factors  
49  
50  
51 254 could differ depending on the group and society to which one belongs. This is best  
52  
53  
54 255 understood in the context of the concept of relative deprivation.[39] In other words, higher  
55  
56  
57 256 levels of relative social isolation may induce greater psychological stress. A previous  
58  
59  
60

1  
2  
3  
4  
5  
6 257 study showed that rich community ties and cohesion were protective factors for health  
7  
8  
9 258 but could have a negative effect on those who were not socially involved.[40] Being  
10  
11  
12 259 isolated in a connected society such as the UK may represent a more severe condition,  
13  
14  
15 260 with a stronger negative impact on mental health.  
16  
17

18 261 Our results revealed that poor interaction with children was significant with  
19  
20  
21 262 regard to depression onset in Japan. In England, while the association was marginal, of  
22  
23  
24 263 the components of social isolation, poor interaction with children had the greatest effect.  
25  
26  
27 264 The lack of interaction with children could have an adverse effect on the mental health of  
28  
29  
30 265 older adults in both countries. Previous studies in England[41] and Japan[22] have  
31  
32  
33 266 reported that social support from children can contribute to alleviating depression, and  
34  
35  
36 267 our results point in the same direction. Older adults without children can be considered a  
37  
38  
39 268 vulnerable group, because adult children, in particular, are often the main source of  
40  
41  
42 269 positive social support for older parents.[42] Older parents have certain expectations with  
43  
44  
45 270 regard to receiving support from their children, and situations wherein these expectations  
46  
47  
48 271 are not met may lead to depressive mood.[43] However, a previous study reported no  
49  
50  
51 272 association between the presence of children and depression among older adults in the  
52  
53  
54 273 US.[22] Owing to strong spousal relationships in the US, the effect of the presence of  
55  
56  
57 274 children might be relatively small. Thus, our study confirmed the adverse effects of poor  
58  
59  
60

1  
2  
3  
4  
5  
6 275 interaction with children common to England and Japan, but international generalizability  
7  
8  
9 276 can only be established based on further research considering the cultural background of  
10  
11  
12 277 family relationships in individual countries.  
13  
14

15 278 Although traditionally Japan is a country in which adult children are expected to  
16  
17  
18 279 demonstrate reciprocity with their parents based on the strong family and kinship-based  
19  
20  
21 280 cultural background,[44] in this study, the effect of interaction with children on  
22  
23  
24 281 depression was relatively modest. In recent years, with trends such as adult children  
25  
26  
27 282 commonly living apart from their parents after marriage[45] and the development of  
28  
29  
30 283 public long-term care services for the ageing population,[46] Japan's family system has  
31  
32  
33 284 become less traditional. Therefore, interaction with children may not be as essential to  
34  
35  
36 285 the health of older adults as before. However, despite these cultural transitions, we believe  
37  
38  
39 286 that interaction with children has some value with regard to preventing depression in old  
40  
41  
42 287 age in Japan.  
43  
44

45 288 Social participation was a strong protective factor for depression onset in Japan,  
46  
47  
48 289 whereas there was no association in England, although the OR was somewhat greater.  
49  
50  
51 290 Several previous studies have reported that social participation helps prevent depression  
52  
53  
54 291 onset.[37, 47–49] Our results pertaining to Japan support these reports. However, the  
55  
56  
57 292 protective effects of social participation on mental health vary depending on the type of  
58  
59  
60

1  
2  
3  
4  
5  
6 293 organisation with which an individual is involved,[48] the individual's attitude towards  
7  
8  
9 294 participation,[48] and the duration[37] and frequency[49] of participation. Regarding the  
10  
11  
12 295 present study, in the English context, the role of social participation in depression  
13  
14  
15 296 prevention might have been unidentifiable due to differences in the effects of these  
16  
17  
18 297 participation contexts. We took into account only social participation, without delving  
19  
20  
21 298 into specific types. Thus, the context of effective social participation, such as type,  
22  
23  
24 299 duration, and role in the organisation in both countries, requires further investigation.  
25  
26  
27 300 Despite these challenges, our findings suggest that in Japan, social isolation prevention  
28  
29  
30 301 measures based on the promotion of social participation could be beneficial for  
31  
32  
33 302 safeguarding the mental health of older adults.

34  
35  
36 303 This study has several strengths. First, it is the first cross-national population-  
37  
38  
39 304 level investigation of the association of social isolation with depression onset using a  
40  
41  
42 305 unified data frame. Second, by using two longitudinal datasets, we were able to examine  
43  
44  
45 306 the prospective association between social isolation and depression. Third, the use of  
46  
47  
48 307 large-scale data allowed us to detect the effects of relatively rare situations of severe  
49  
50  
51 308 social isolation.

52  
53  
54 309 However, certain limitations cannot be ignored. First, the measurement of  
55  
56  
57 310 depression in the two cohorts was not the same. Therefore, we could not directly compare  
58  
59  
60

1  
2  
3  
4  
5  
6 311 depression onset in the two countries. However, these measurements were also used in a  
7  
8  
9 312 previous cross-national comparison study in England and Japan,[28] and we were able to  
10  
11  
12 313 examine the association between social isolation and depression onset in both countries  
13  
14  
15 314 using the same data frame. Second, we used social support for the assessment of social  
16  
17  
18 315 contact for some items in order to be able to use the same SII. Therefore, cultural  
19  
20  
21 316 differences in expectations regarding the receipt of social support in both countries might  
22  
23  
24 317 have caused information biases. For instance, expectations regarding social support from  
25  
26  
27 318 relatives could originally have been higher in Japan,[44] leading to overestimation of  
28  
29  
30 319 social isolation levels. Third, regarding the items of the SII, the questions and their  
31  
32  
33 320 response options in the ELSA and JAGES were not exactly the same, nor were they  
34  
35  
36 321 strictly authorised through procedures such as reverse translation and confirming  
37  
38  
39 322 reliability and validity. However, we believe it is certainly meaningful to evaluate social  
40  
41  
42 323 isolation using the same framework. Finally, there were differences in study design in the  
43  
44  
45 324 data from the two cohorts, such as sampling method and follow-up period. We, therefore,  
46  
47  
48 325 made efforts to harmonise the data: those aged  $\leq 64$ , with dementia, and dependent in  
49  
50  
51 326 activities of daily living were excluded from the analysis. Moreover, the ELSA presents  
52  
53  
54 327 nationally representative population data, while the JAGES does not. However, the  
55  
56  
57 328 JAGES sample is representative of areas from a nationwide ageing study in which  
58  
59  
60



1  
2  
3  
4  
5  
6 329 approximately one-fifth of all prefectures (nine out of 47) were enrolled. Even so, unlike  
7  
8  
9 330 the ELSA, analysis in the JAGES does not use sampling weights, which may lead to  
10  
11  
12 331 selection bias.  
13

14  
15 332

### 18 333 **CONCLUSION**

21 334 We examined the association between social isolation and depression onset among older  
22  
23  
24 335 adults in England and Japan, who experience different cultural contexts regarding social  
25  
26  
27 336 relationships, and found a significant association in both countries; we also observed that  
28  
29  
30 337 in England, poor interaction with children was marginally associated, and in Japan, poor  
31  
32  
33 338 interaction and lack of social participation were significantly associated with depression.  
34  
35  
36 339 Tackling social isolation must be prioritised to safeguard the mental health of older adults  
37  
38  
39 340 worldwide. Particularly in Japan, the promotion of interaction with children and social  
40  
41  
42 341 participation could be key factors in addressing social isolation.  
43

44  
45 342

### 48 343 **ACKNOWLEDGEMENTS**

51 344 We wish to express our deepest gratitude to the members in the Japan Gerontological  
52  
53  
54 345 Evaluation Study. We would also like to thank everyone who participated in the surveys.  
55

56  
57 346  
58  
59  
60

1  
2  
3  
4  
5  
6 347 **AUTHORS' CONTRIBUTIONS**  
7

8  
9 348 All authors contributed to the conception and design of this study. Data collection was  
10  
11  
12 349 primarily conducted by MS, JA, NC, KO, and KK. Analyses were performed by TN, MS,  
13  
14  
15 350 JA, TT, SK, and TI. TN prepared the initial manuscript and MS, JA, NC, TT, SK, TI, KO,  
16  
17  
18 351 and KK significantly contributed to revising it. All authors read and approved the final  
19  
20  
21 352 manuscript.  
22

23  
24 353

25  
26  
27 354 **FUNDING STATEMENT**  
28

29  
30 355 This work was supported by a grant from the Grants-in-Aid for Scientific Research  
31  
32  
33 356 (18KK0057, 19K24277) from the Japan Society for the Promotion of Science. The  
34  
35  
36 357 English Longitudinal Study of Ageing was developed by a team of researchers based at  
37  
38  
39 358 the University College London, NatCen Social Research, and the Institute for Fiscal  
40  
41  
42 359 Studies. The data were collected by NatCen Social Research. The funding is currently  
43  
44  
45 360 provided by the National Institute of Aging (R01AG017644) and a consortium of UK  
46  
47  
48 361 government departments coordinated by the National Institute for Health Research. The  
49  
50  
51 362 Japan Gerontological Evaluation Study is supported by the Ministry of Education, Culture,  
52  
53  
54 363 Sports, Science and Technology-Japan-Supported Program for the Strategic Research  
55  
56  
57 364 Foundation at Private Universities (2009-2013), Japan Society for the Promotion of  
58  
59  
60

1  
2  
3  
4  
5  
6 365 Science KAKENHI Grant Numbers (JP18390200, JP22330172, JP22390400,  
7  
8  
9 366 JP23243070, JP23590786, JP23790710, JP24390469, JP24530698, JP24683018,  
10  
11  
12 367 JP25253052, JP25870573, JP25870881, JP26285138, JP26882010, JP15H01972),  
13  
14  
15 368 Health Labour Sciences Research Grants (H22-Choju-Shitei-008, H24-Junkanki -Ippan-  
16  
17  
18 369 007, H24-Chikyukibo-Ippan-009, H24-Choju-Wakate-009, H25-Kenki-Wakate-015,  
19  
20  
21 370 H25-Choju-Ippan-003, H26-Irryo-Shitei-003 [Fukkou], H26-Choju-Ippan-006, H27-  
22  
23  
24 371 Ninchisyou-Ippan-001, H28-chojuIppan-002, H28-Ninchisho-Ippan-002, H30-Kenki-  
25  
26  
27 372 Ippan-006, H30-Junkankitou-Ippan-004), Japan Agency for Medical Research and  
28  
29  
30 373 Development (JP17dk0110017, JP18dk0110027, JP18ls0110002, JP18le0110009,  
31  
32  
33 374 JP19dk0110034), Research Funding for Longevity Sciences from the National Center for  
34  
35  
36 375 Geriatrics and Gerontology (24-17, 24-23, 29-42, 30-22, 20-40), Open Innovation  
37  
38  
39 376 Platform with Enterprises, Research Institute and Academia (OPERA, JPMJOP1831)  
40  
41  
42 377 from the Japan Science and Technology Agency, and a Research Grant from the Health  
43  
44  
45 378 Science Center Foundation (2019-2020). The funding sources had no role in the study  
46  
47  
48 379 design, data collection and analysis, decision to publish or preparation of the manuscript.  
49  
50

51 380

#### 54 381 **DATA SHARING STATEMENT**

57 382 For the JAGES, all enquiries are to be addressed to the data management committee via  
58  
59  
60

1  
2  
3  
4  
5  
6 383 e-mail: dataadmin.ml@jages.net. All JAGES datasets have ethical or legal restrictions for  
7  
8  
9 384 public deposition because of the inclusion of sensitive information about the human  
10  
11  
12 385 participants. Regarding the ELSA, data are available in an open-access repository at  
13  
14  
15 386 [http://www. dataarchive.ac.uk/](http://www.dataarchive.ac.uk/).

16  
17  
18 387

19  
20  
21 388 **COMPETING INTERESTS STATEMENT**

22  
23  
24 389 The authors declare no conflict of interest.

25  
26  
27 390

28  
29  
30 391 **REFERENCES**

31  
32  
33 392 1. Townsend P. The family life of old people: an investigation in East London. *Sociol Rev*  
34  
35  
36 393 1955;3:175–95. doi: 10.1111/j.1467-954X.1955.tb01052.x

37  
38  
39 394 2. Holt-Lunstad J, Smith TB, Layton JB. Social relationships and mortality risk: a meta-  
40  
41  
42 395 analytic review. *PLoS Med* 2010;7:e1000316. doi:10.1371/journal.pmed.1000316

43  
44  
45 396 3. Valtorta NK, Kanaan M, Gilbody S, et al. Loneliness and social isolation as risk factors  
46  
47  
48 397 for coronary heart disease and stroke: systematic review and meta-analysis of  
49  
50  
51 398 longitudinal observational studies. *Heart* 2016;102:1009–16.  
52  
53  
54 399 doi:10.1136/heartjnl-2015-308790

55  
56  
57 400 4. Livingston G, Sommerlad A, Orgeta V, et al. Dementia prevention, intervention, and  
58  
59  
60

- 1  
2  
3  
4  
5  
6  
7 401 care. *Lancet* 2017;390:2673–734. doi:10.1016/s0140-6736(17)31363-6
- 8  
9  
10 402 5. Leigh-Hunt N, Bagguley D, Bash K, et al. An overview of systematic reviews on the  
11  
12 403 public health consequences of social isolation and loneliness. *Public Health*  
13  
14  
15 404 2017;152:157–71. doi:10.1016/j.puhe.2017.07.035
- 16  
17  
18 405 6. Santini ZI, Koyanagi A, Tyrovolas S, et al. The association between social relationships  
19  
20  
21 406 and depression: a systematic review. *J Affect Disord* 2015;175:53–65.  
22  
23  
24 407 doi:10.1016/j.jad.2014.12.049
- 25  
26  
27 408 7. Kawachi I, Berkman LF. Social ties and mental health. *J Urban Health* 2001;78:458–  
28  
29  
30 409 67. doi:10.1093/jurban/78.3.458
- 31  
32  
33 410 8. Sivertsen H, Bjorklof GH, Engedal K, et al. Depression and quality of life in older  
34  
35  
36 411 persons: a review. *Dement Geriatr Cogn Disord* 2015;40:311–39.  
37  
38  
39 412 doi:10.1159/000437299
- 40  
41  
42 413 9. Chen CM, Mullan J, Su YY, et al. The longitudinal relationship between depressive  
43  
44  
45 414 symptoms and disability for older adults: a population-based study. *J Gerontol A*  
46  
47  
48 415 *Biol Sci Med Sci* 2012;67:1059–67. doi:10.1093/gerona/gls074
- 49  
50  
51 416 10. World Federation for Mental Health. Depression: a global crisis. World Mental Health  
52  
53  
54 417 Day, October 10 2012. 2012.  
55  
56  
57 418 [https://www.who.int/mental\\_health/management/depression/wfmh\\_paper\\_depre](https://www.who.int/mental_health/management/depression/wfmh_paper_depre)  
58  
59  
60

- 1  
2  
3  
4  
5  
6 419 sion\_wmhd\_2012.pdf (accessed 7 Feb 2020).  
7  
8  
9 420 11. Saito M, Aida J, Cable N, et al. Cross-national comparison of social isolation and  
10  
11  
12 421 mortality among older adults: a 10-year follow-up study in Japan and England.  
13  
14  
15 422 *Geriatr Gerontol Int* 2020 doi: 10.1111/ggi.14118  
16  
17  
18 423 12. HM Government. A connected society: a strategy for tackling loneliness – laying the  
19  
20  
21 424 foundations for change. 2018.  
22  
23  
24 425 [https://assets.publishing.service.gov.uk/government/uploads/system/uploads/atta](https://assets.publishing.service.gov.uk/government/uploads/system/uploads/attachment_data/file/750909/6.4882_DCMS_Loneliness_Strategy_web_Update.pdf)  
25  
26  
27 426 [chment\\_data/file/750909/6.4882\\_DCMS\\_Loneliness\\_Strategy\\_web\\_Update.pdf](https://assets.publishing.service.gov.uk/government/uploads/system/uploads/attachment_data/file/750909/6.4882_DCMS_Loneliness_Strategy_web_Update.pdf)  
28  
29  
30 427 (accessed 12 Oct 2020).  
31  
32  
33 428 13. Muramatsu N, Akiyama H. Japan: super-aging society preparing for the future.  
34  
35  
36 429 *Gerontologist* 2011;51:425–32. doi: 10.1093/geront/gnr067  
37  
38  
39 430 14. National Institute of Population and Social Security Research. Household projections  
40  
41  
42 431 for Japan. [http://www.ipss.go.jp/pp-ajsetai/e/hprj\\_98/hprj\\_98.html](http://www.ipss.go.jp/pp-ajsetai/e/hprj_98/hprj_98.html) (accessed 12  
43  
44  
45 432 Oct 2020).  
46  
47  
48 433 15. Murayama H, Shibui Y, Fukuda Y, et al. A new crisis in Japan-social isolation in old  
49  
50  
51 434 age. *J Am Geriatr Soc* 2011;59:2160–2. doi:10.1111/j.1532-5415.2011.03640.x  
52  
53  
54 435 16. Organisation for Economic Co-operation and Development. Society at a Glance:  
55  
56  
57 436 OECD Social Indicators. Paris: OECD Publishing 2005.  
58  
59  
60

- 1  
2  
3  
4  
5  
6 437 17. Takagi E, Silverstein M. Intergenerational coresidence of the Japanese elderly:are  
7  
8  
9 438 cultural norms proactive or reactive? *Research on Aging* 2006;28:473–92. doi:  
10  
11  
12 439 10.1177/0164027506287788  
13  
14  
15 440 18. Knight B, Robinson Shurgot G, Longmire C, et al. Cross cultural issues in caregiving  
16  
17  
18 441 for persons with dementia: do familism values reduce burden and distress? *Aging*  
19  
20  
21 442 *International* 2002;27:70–94. doi: 10.1007/s12126-003-1003-y  
22  
23  
24 443 19. Knight BG, Sayegh P. Cultural values and caregiving: the updated sociocultural stress  
25  
26  
27 444 and coping model. *J Gerontol B Psychol Sci Soc Sci* 2009;65B(1):5–13. doi:  
28  
29  
30 445 10.1093/geronb/gbp096 %  
31  
32  
33 446 20. Cabinet Office. International Comparative Survey on the Life and Awareness of the  
34  
35  
36 447 Elderly in 2015. Cabinet Office, Tokyo. 2015.  
37  
38  
39 448 <https://www8.cao.go.jp/kourei/ishiki/h27/zentai/index.html> (accessed 30 Jan  
40  
41  
42 449 2021).  
43  
44  
45 450 21. Aida J, Cable N, Zaninotto P, et al. Social and behavioural determinants of the  
46  
47  
48 451 difference in survival among older adults in Japan and England. *Gerontology*  
49  
50  
51 452 2018;64:266–77. doi:10.1159/000485797  
52  
53  
54 453 22. Sugisawa H, Shibata H, Hougham GW, et al. The impact of social ties on depressive  
55  
56  
57 454 symptoms in U.S. and Japanese elderly. *J Soc Issues* 2003;58:785–804.  
58  
59  
60

- 1  
2  
3  
4  
5  
6 455 doi:10.1111/1540-4560.00290  
7  
8  
9 456 23. Cable N, Chandola T, Lallukka T, et al. Country specific associations between social  
10  
11  
12 457 contact and mental health: evidence from civil servant studies across Great Britain,  
13  
14  
15 458 Japan and Finland. *Public Health* 2016;137:139–46. doi:  
16  
17  
18 459 10.1016/j.puhe.2015.10.013  
19  
20  
21 460 24. Santini ZI, Jose PE, York Cornwell E, et al. Social disconnectedness, perceived  
22  
23  
24 461 isolation, and symptoms of depression and anxiety among older Americans  
25  
26  
27 462 (NSHAP): a longitudinal mediation analysis. *Lancet Public Health* 2020;5:e62–  
28  
29  
30 463 70. doi:10.1016/s2468-2667(19)30230-0  
31  
32  
33 464 25. Mossialos E, Djordjevic A, Osborn R, et al. International profiles of health care  
34  
35  
36 465 systems. 2017.  
37  
38  
39 466 [https://www.commonwealthfund.org/sites/default/files/documents/\\_\\_\\_media\\_fil](https://www.commonwealthfund.org/sites/default/files/documents/___media_files_publications_fund_report_2017_may_mossialos_intl_profiles_v5.pdf)  
40  
41  
42 467 [es\\_publications\\_fund\\_report\\_2017\\_may\\_mossialos\\_intl\\_profiles\\_v5.pdf](https://www.commonwealthfund.org/sites/default/files/documents/___media_files_publications_fund_report_2017_may_mossialos_intl_profiles_v5.pdf)  
43  
44  
45 468 (accessed 12 Oct 2020).  
46  
47  
48 469 26. Kondo K. Progress in aging epidemiology in Japan: the JAGES Project. *J Epidemiol*  
49  
50  
51 470 2016;26:331–6. doi:10.2188/jea.JE20160093  
52  
53  
54 471 27. Steptoe A, Breeze E, Banks J, et al. Cohort profile: the English longitudinal study of  
55  
56  
57 472 ageing. *Int J Epidemiol* 2013;42:1640–8. doi: 10.1093/ije/dys168  
58  
59  
60



- 1  
2  
3  
4  
5  
6 473 28. Cable N, Chandola T, Aida J, et al. Can sleep disturbance influence changes in mental  
7  
8  
9 474 health status? Longitudinal research evidence from ageing studies in England and  
10  
11  
12 475 Japan. *Sleep Med* 2017;30:216–21. doi:10.1016/j.sleep.2016.11.017  
13  
14  
15 476 29. Marmot M, Banks J, Blundell R, et al. Health, Wealth and Lifestyles of the Older  
16  
17  
18 477 Population in England: The 2002 English Longitudinal Study of Ageing. London:  
19  
20  
21 478 Institute for Fiscal Studies 2003.  
22  
23  
24 479 30. Wada T, Ishine M, Kita T, et al. Depression screening of elderly community-dwelling  
25  
26  
27 480 Japanese. *J Am Geriatr Soc* 2003;51:1328–9. doi: 10.1046/j.1532-  
28  
29  
30 481 5415.2003.514207.x  
31  
32  
33 482 31. Gallagher D, Kiss A, Lanctot K, et al. Depressive symptoms and cognitive decline: a  
34  
35  
36 483 longitudinal analysis of potentially modifiable risk factors in community dwelling  
37  
38  
39 484 older adults. *J Affect Disord* 2016;190:235–40. doi:10.1016/j.jad.2015.09.046  
40  
41  
42 485 32. Burke WJ, Roccaforte WH, Wengel SP. The short form of the Geriatric Depression  
43  
44  
45 486 Scale: a comparison with the 30-item form. *J Geriatr Psychiatry Neurol*  
46  
47  
48 487 1991;4:173–8. doi:10.1177/089198879100400310  
49  
50  
51 488 33. Ikeda T, Cable N, Saito M, et al. Association between social isolation and smoking in  
52  
53  
54 489 Japan and England. *J Epidemiol* 2020 doi: 10.2188/jea.JE20200138  
55  
56  
57 490 34. Tsuji T, Saito M, Ikeda T, et al. Change in the prevalence of social isolation among  
58  
59  
60

- 1  
2  
3  
4  
5  
6 491 the older population from 2010 to 2016: a repeated cross-sectional comparative  
7  
8  
9 492 study of Japan and England. *Arch Gerontol Geriatr* 2020;91:104237. doi:  
10  
11  
12 493 10.1016/j.archger.2020.104237  
13  
14  
15 494 35. Shankar A, McMunn A, Banks J, et al. Loneliness, social isolation, and behavioral  
16  
17  
18 495 and biological health indicators in older adults. *Health Psychol* 2011;30:377–85.  
19  
20  
21 496 doi:10.1037/a0022826  
22  
23  
24 497 36. White IR, Royston P, Wood AM. Multiple imputation using chained equations: issues  
25  
26  
27 498 and guidance for practice. *Stat Med* 2011;30:377–99. doi:10.1002/sim.4067  
28  
29  
30 499 37. Cruwys T, Dingle GA, Haslam C, et al. Social group memberships protect against  
31  
32  
33 500 future depression, alleviate depression symptoms and prevent depression relapse.  
34  
35  
36 501 *Soc Sci Med* 2013;98:179–86. doi:10.1016/j.socscimed.2013.09.013  
37  
38  
39 502 38. Koizumi Y, Awata S, Kuriyama S, et al. Association between social support and  
40  
41  
42 503 depression status in the elderly: results of a 1-year community-based prospective  
43  
44  
45 504 cohort study in Japan. *Psychiatry Clin Neurosci* 2005;59:563–9.  
46  
47  
48 505 doi:10.1111/j.1440-1819.2005.01415.x  
49  
50  
51 506 39. Smith HJ, Pettigrew TF, Pippin GM, et al. Relative deprivation: a theoretical and  
52  
53  
54 507 meta-analytic review. *Pers Soc Psychol Rev* 2012;16:203–32.  
55  
56  
57 508 doi:10.1177/1088868311430825  
58  
59  
60

- 1  
2  
3  
4  
5  
6 509 40. Amemiya A, Saito J, Saito M, et al. Social capital and the improvement in functional  
7  
8  
9 510 ability among older people in Japan: a multilevel survival analysis using JAGES  
10  
11  
12 511 data. *Int J Environ Res Public Health* 2019;16:1310. doi:10.3390/ijerph16081310  
13  
14  
15 512 41. Stafford M, McMunn A, Zaninotto P, et al. Positive and negative exchanges in social  
16  
17  
18 513 relationships as predictors of depression: evidence from the English Longitudinal  
19  
20  
21 514 Study of Aging. *J Aging Health* 2011;23:607–28.  
22  
23  
24 515 doi:10.1177/0898264310392992  
25  
26  
27 516 42. Koropecj-Cox T. Loneliness and depression in middle and old age: are the childless  
28  
29  
30 517 more vulnerable? *J Gerontol B Psychol Sci Soc Sci* 1998;53:S303–12. doi:  
31  
32  
33 518 10.1093/geronb/53b.6.s303  
34  
35  
36 519 43. Lee GR, Netzer JK, Coward RT. Depression among older parents: the role of  
37  
38  
39 520 intergenerational exchange. *J Marriage Family* 1995;57:823–33. doi:  
40  
41  
42 521 10.2307/353935  
43  
44  
45 522 44. Brown JW, Liang J, Krause N, et al. Transitions in living arrangements among elders  
46  
47  
48 523 in Japan: does health make a difference? *J Gerontol B Psychol Sci Soc Sci*  
49  
50  
51 524 2002;57:S209–20. doi: 10.1093/geronb/57.4.s209  
52  
53  
54 525 45. Takagi E, Silverstein M. Purchasing piety? Coresidence of married children with their  
55  
56  
57 526 older parents in Japan. *Demography* 2011;48:1559–79. doi:10.1007/s13524-011-  
58  
59  
60

- 1  
2  
3  
4  
5  
6 527 0053-0  
7  
8  
9 528 46. Tsutsui T, Muramatsu N. Care-needs certification in the long-term care insurance  
10  
11  
12 529 system of Japan. *J Am Geriatr Soc* 2005;53(3):522–7. doi: 10.1111/j.1532-  
13  
14  
15 530 5415.2005.53175.x  
16  
17  
18 531 47. Takagi D, Kondo K, Kawachi I. Social participation and mental health: moderating  
19  
20  
21 532 effects of gender, social role and rurality. *BMC Public Health* 2013;13:701.  
22  
23  
24 533 doi:10.1186/1471-2458-13-701  
25  
26  
27 534 48. Tomioka K, Kurumatani N, Hosoi H. Positive and negative influences of social  
28  
29  
30 535 participation on physical and mental health among community-dwelling elderly  
31  
32  
33 536 aged 65-70 years: a cross-sectional study in Japan. *BMC Geriatr* 2017;17:111.  
34  
35  
36 537 doi: 10.1186/s12877-017-0502-8  
37  
38  
39 538 49. Choi E, Han KM, Chang J, et al. Social participation and depressive symptoms in  
40  
41  
42 539 community-dwelling older adults: emotional social support as a mediator. *J*  
43  
44  
45 540 *Psychiatr Res* 2020. doi: 10.1016/j.jpsychires.2020.10.043  
46  
47  
48 541  
49  
50  
51  
52  
53  
54  
55  
56  
57  
58  
59  
60

**Supplementary Table 1. Association between social isolation and depression onset, by complete case analysis**

|                                |                        | ELSA                       |                               | JAGES                      |                            |
|--------------------------------|------------------------|----------------------------|-------------------------------|----------------------------|----------------------------|
|                                |                        | Crude OR (95% CI)          | Adjusted OR (95% CI)          | Crude OR (95% CI)          | Adjusted OR (95% CI)       |
| Social Isolation Index score   | 0                      | 1.00 (reference)           | 1.00 (reference)              | 1.00 (reference)           | 1.00 (reference)           |
|                                | 1                      | 1.92** (1.19–3.10)         | 1.56 <sup>†</sup> (0.94–2.60) | 1.14 (0.94–1.39)           | 1.11 (0.87–1.41)           |
|                                | 2                      | 2.15** (1.28–3.62)         | 1.71 <sup>†</sup> (0.98–2.99) | 1.32** (1.09–1.60)         | 1.20 (0.95–1.51)           |
|                                | 3                      | 3.19*** (1.73–5.90)        | 2.50** (1.27–4.90)            | 1.57*** (1.30–1.90)        | 1.30* (1.03–1.64)          |
|                                | ≥ 4                    | 3.85** (1.46–10.18)        | 5.17** (1.83–14.66)           | 2.26*** (1.83–2.79)        | 1.47** (1.13–1.91)         |
|                                |                        | <i>p</i> for trend < 0.001 | <i>p</i> for trend < 0.001    | <i>p</i> for trend < 0.001 | <i>p</i> for trend < 0.001 |
| Age (years)                    | 65–69                  |                            | 1.00 (reference)              |                            | 1.00 (reference)           |
|                                | 70–74                  |                            | 1.37 (0.83–2.25)              |                            | 1.16** (1.05–1.30)         |
|                                | 75–79                  |                            | 1.24 (0.71–2.14)              |                            | 1.31*** (1.16–1.48)        |
|                                | 80–84                  |                            | 1.66 <sup>†</sup> (0.92–2.99) |                            | 1.60*** (1.37–1.88)        |
|                                | ≥ 85                   |                            | 0.97 (0.45–2.09)              |                            | 1.79*** (1.39–2.30)        |
| Gender                         | Male                   |                            | 1.00 (reference)              |                            | 1.00 (reference)           |
|                                | Female                 |                            | 1.58* (1.07–2.34)             |                            | 1.00 (0.90–1.11)           |
| Educational attainment (years) | < 15                   |                            | 1.00 (reference)              |                            | 1.00 (reference)           |
|                                | 16–18                  |                            | 1.05 (0.68–1.60)              |                            | 0.81*** (0.74–0.89)        |
|                                | ≥ 19                   |                            | 1.30 (0.70–2.41)              |                            | 0.68*** (0.60–0.78)        |
| Household equivalised income   | 1st quintile (lowest)  |                            | 1.00 (reference)              |                            | 1.00 (reference)           |
|                                | 2nd quintile           |                            | 0.70 (0.40–0.21)              |                            | 0.95 (0.83–1.09)           |
|                                | 3rd quintile           |                            | 1.11 (0.66–1.87)              |                            | 0.76*** (0.67–0.87)        |
|                                | 4th quintile           |                            | 0.82 (0.45–1.50)              |                            | 0.67*** (0.57–0.79)        |
|                                | 5th quintile (highest) |                            | 0.84 (0.42–1.68)              |                            | 0.65*** (0.56–0.76)        |

1  
2  
3  
4  
5  
6  
7  
8  
9  
10  
11  
12  
13  
14  
15  
16  
17  
18  
19  
20  
21  
22  
23  
24  
25  
26  
27  
28  
29  
30  
31  
32  
33  
34  
35  
36  
37  
38  
39  
40  
41  
42  
43  
44  
45  
46

|                         |            |                     |                     |
|-------------------------|------------|---------------------|---------------------|
| Cancer                  | No         | 1.00 (reference)    | 1.00 (reference)    |
|                         | Yes        | 0.95 (0.32–2.81)    | 1.16 (0.93–1.43)    |
| Heart disease           | No         | 1.00 (reference)    | 1.00 (reference)    |
|                         | Yes        | 1.13 (0.67–1.92)    | 1.20 (1.05–1.37)    |
| Stroke                  | No         | 1.00 (reference)    | 1.00 (reference)    |
|                         | Yes        | 1.3 (0.56–3.02)     | 1.18 (0.80–1.73)    |
| Self-rated health       | Good       | 1.00 (reference)    | 1.00 (reference)    |
|                         | Poor       | 1.71* (1.13–2.59)   | 1.63*** (1.44–1.85) |
| CES-D score at baseline |            | 1.90*** (1.60–2.25) |                     |
| GDS score at baseline   |            |                     | 1.92*** (1.86–1.99) |
| Smoking                 | Never/past | 1.00 (reference)    | 1.00 (reference)    |
|                         | Current    | 0.76 (0.76–1.56)    | 1.29*** (1.12–1.48) |
| Drinking                | Never/past | 1.00 (reference)    | 1.00 (reference)    |
|                         | Current    | 1.41 (0.81 – 2.44)  | 1.02 (0.93 – 1.13)  |

\*,  $p < 0.05$ ; \*\*,  $p < 0.01$ ; \*\*\*,  $p < 0.001$ ; †,  $p < 0.1$

ELSA, English Longitudinal Study of Ageing; JAGES, Japan Gerontological Evaluation Study; CES-D, Center for Epidemiologic Studies Depression Scale; CI, confidence interval; GDS, Geriatric Depression Scale; OR, odds ratio

**Supplementary Table 2. Association between sub-components of social isolation and depression onset, by complete case analysis**

|                                                   |  | ELSA                   |                      | JAGES               |                      |
|---------------------------------------------------|--|------------------------|----------------------|---------------------|----------------------|
|                                                   |  | Crude OR (95% CI)      | Adjusted OR (95% CI) | Crude OR (95% CI)   | Adjusted OR (95% CI) |
| Social Isolation Index sub-components (ref; none) |  |                        |                      |                     |                      |
| Unmarried or living alone                         |  | 1.91*** (1.34–2.72)    | 1.27 (0.84–1.93)     | 1.33*** (1.18–1.49) | 1.02 (0.88–1.19)     |
| Poor interaction with children                    |  | 1.08 (0.68–1.74)       | 1.51 (0.91–2.50)     | 1.01 (0.98–1.10)    | 1.13* (1.02–1.25)    |
| Poor interaction with relatives                   |  | 1.25 (0.83–1.90)       | 1.33 (0.85–2.08)     | 1.05 (0.97–1.13)    | 0.98 (0.90–1.08)     |
| Poor interaction with friends                     |  | 1.19 (0.78–1.80)       | 1.21 (0.78–1.87)     | 1.23 (1.14–1.33)    | 1.11* (1.01–1.22)    |
| No social participation                           |  | 1.54* (1.08–2.19)      | 1.46† (0.98–2.16)    | 1.70 (1.56–1.86)    | 1.22*** (1.09–1.36)  |
| Age (years)                                       |  |                        |                      |                     |                      |
|                                                   |  | 65–69                  | 1.00 (reference)     |                     | 1.00 (reference)     |
|                                                   |  | 70–74                  | 1.37 (0.83–2.25)     |                     | 1.17** (1.05–1.30)   |
|                                                   |  | 75–79                  | 1.25 (0.72–2.17)     |                     | 1.31*** (1.16–1.49)  |
|                                                   |  | 80–84                  | 1.68† (0.92–3.04)    |                     | 1.60*** (1.36–1.88)  |
|                                                   |  | ≥ 85                   | 1.00 (0.46–2.21)     |                     | 1.78*** (1.38–2.30)  |
| Gender                                            |  | Male                   | 1.00 (reference)     |                     | 1.00 (reference)     |
|                                                   |  | Female                 | 1.59* (1.07–2.37)    |                     | 1.00 (0.89–1.11)     |
| Educational attainment (years)                    |  | < 15                   | 1.00 (reference)     |                     | 1.00 (reference)     |
|                                                   |  | 10–12                  | 1.04 (0.67–1.60)     |                     | 0.81*** (0.74–0.90)  |
|                                                   |  | ≥ 19                   | 1.31 (0.70–2.46)     |                     | 0.69*** (0.61–0.78)  |
| Household equivalised income                      |  | 1st quintile (lowest)  | 1.00 (reference)     |                     | 1.00 (reference)     |
|                                                   |  | 2nd quintile           | 0.71 (0.41–1.23)     |                     | 0.95 (0.83–1.09)     |
|                                                   |  | 3rd quintile           | 1.13 (0.67–1.93)     |                     | 0.76*** (0.67–0.86)  |
|                                                   |  | 4th quintile           | 0.83 (0.45–1.52)     |                     | 0.67*** (0.57–0.79)  |
|                                                   |  | 5th quintile (highest) | 0.85 (0.42–1.71)     |                     | 0.66*** (0.57–0.76)  |
| Cancer                                            |  | No                     | 1.00 (reference)     |                     | 1.00 (reference)     |
|                                                   |  | Yes                    | 0.95 (0.32–2.81)     |                     | 1.15 (0.93–1.43)     |

1  
2  
3  
4  
5  
6  
7  
8  
9  
10  
11  
12  
13  
14  
15  
16  
17  
18  
19  
20  
21  
22  
23  
24  
25  
26  
27  
28  
29  
30  
31  
32  
33  
34  
35  
36  
37  
38  
39  
40  
41  
42  
43  
44  
45  
46

|                         |            |                     |                     |
|-------------------------|------------|---------------------|---------------------|
| Heart disease           | No         | 1.00 (reference)    | 1.00 (reference)    |
|                         | Yes        | 1.16 (0.69–1.96)    | 1.20** (1.05–1.37)  |
| Stroke                  | No         | 1.00 (reference)    | 1.00 (reference)    |
|                         | Yes        | 1.28 (0.55–2.99)    | 1.18 (0.80–1.73)    |
| Self-rated health       | Good       | 1.00 (reference)    | 1.00 (reference)    |
|                         | Poor       | 1.71* (1.13–2.58)   | 1.62*** (1.43–1.83) |
| CES-D score at baseline |            | 1.89*** (1.59–2.25) | 1.00 (reference)    |
| GDS score at baseline   |            |                     | 1.92*** (1.85–1.99) |
| Smoking                 | Never/past | 1.00 (reference)    | 1.00 (reference)    |
|                         | Current    | 0.74 (0.36–1.53)    | 1.29*** (1.13–1.48) |
| Drinking                | Never/past | 1.00 (reference)    | 1.00 (reference)    |
|                         | Current    | 1.39 (0.80–2.40)    | 1.03 (0.93–1.14)    |

---

\*,  $p < 0.05$ ; \*\*,  $p < 0.01$ ; \*\*\*,  $p < 0.001$ ; †,  $p < 0.1$   
 ELSA, English Longitudinal Study of Ageing; JAGES, Japan Gerontological Evaluation Study; CES-D, Center for Epidemiologic Studies Depression Scale; CI, confidence interval; GDS, Geriatric Depression Scale; OR, odds ratio



STROBE Statement—Checklist of items that should be included in reports of *cohort studies*

|                              | Item No | Recommendation                                                                                                                                                                                                                                                                                                         | Page No                                                           |
|------------------------------|---------|------------------------------------------------------------------------------------------------------------------------------------------------------------------------------------------------------------------------------------------------------------------------------------------------------------------------|-------------------------------------------------------------------|
| <b>Title and abstract</b>    | 1       | (a) Indicate the study's design with a commonly used term in the title or the abstract<br>(b) Provide in the abstract an informative and balanced summary of what was done and what was found                                                                                                                          | 1, 3<br>3-4                                                       |
| <b>Introduction</b>          |         |                                                                                                                                                                                                                                                                                                                        |                                                                   |
| Background/rationale         | 2       | Explain the scientific background and rationale for the investigation being reported                                                                                                                                                                                                                                   | 6-9                                                               |
| Objectives                   | 3       | State specific objectives, including any prespecified hypotheses                                                                                                                                                                                                                                                       | 9                                                                 |
| <b>Methods</b>               |         |                                                                                                                                                                                                                                                                                                                        |                                                                   |
| Study design                 | 4       | Present key elements of study design early in the paper                                                                                                                                                                                                                                                                | 9                                                                 |
| Setting                      | 5       | Describe the setting, locations, and relevant dates, including periods of recruitment, exposure, follow-up, and data collection                                                                                                                                                                                        | 9-10                                                              |
| Participants                 | 6       | (a) Give the eligibility criteria, and the sources and methods of selection of participants. Describe methods of follow-up<br>(b) For matched studies, give matching criteria and number of exposed and unexposed                                                                                                      | 9-10<br>Not applicable                                            |
| Variables                    | 7       | Clearly define all outcomes, exposures, predictors, potential confounders, and effect modifiers. Give diagnostic criteria, if applicable                                                                                                                                                                               | 10-11                                                             |
| Data sources/<br>measurement | 8*      | For each variable of interest, give sources of data and details of methods of assessment (measurement). Describe comparability of assessment methods if there is more than one group                                                                                                                                   | 10-11                                                             |
| Bias                         | 9       | Describe any efforts to address potential sources of bias                                                                                                                                                                                                                                                              | 12                                                                |
| Study size                   | 10      | Explain how the study size was arrived at                                                                                                                                                                                                                                                                              | Not applicable                                                    |
| Quantitative variables       | 11      | Explain how quantitative variables were handled in the analyses. If applicable, describe which groupings were chosen and why                                                                                                                                                                                           | 10-11                                                             |
| Statistical methods          | 12      | (a) Describe all statistical methods, including those used to control for confounding<br>(b) Describe any methods used to examine subgroups and interactions<br>(c) Explain how missing data were addressed<br>(d) If applicable, explain how loss to follow-up was addressed<br>(e) Describe any sensitivity analyses | 11-12<br>Not applicable<br>12<br>Not applicable<br>Not applicable |
| <b>Results</b>               |         |                                                                                                                                                                                                                                                                                                                        |                                                                   |
| Participants                 | 13*     | (a) Report numbers of individuals at each stage of study—eg numbers potentially eligible, examined for eligibility, confirmed eligible, included in the study, completing follow-up, and analysed<br>(b) Give reasons for non-participation at each stage<br>(c) Consider use of a flow diagram                        | 13<br>Not applicable<br>Not applicable                            |
| Descriptive data             | 14*     | (a) Give characteristics of study participants (eg demographic, clinical, social) and information on exposures and potential confounders<br>(b) Indicate number of participants with missing data for each variable of interest<br>(c) Summarise follow-up time (eg, average and total amount)                         | 13-14<br>15-16<br>10                                              |
| Outcome data                 | 15*     | Report numbers of outcome events or summary measures over time                                                                                                                                                                                                                                                         | 17-18                                                             |
