# Supplementary material for: Association between social isolation and depression onset among older adults: a cross-national longitudinal study in England and Japan
Source: PubMed Central journal article supplement (PMC7978252; doi:10.1136/bmjopen-2020-045834), 2021-03-18
Supplement: bmjopen-2020-045834supp001.pdf [file bmjopen-2020-045834supp001.pdf]

**Supplementary Table 1. Association between social isolation and depression onset, by complete case analysis**

|                                |                        | ELSA                       |                            | JAGES                      |                            |
|--------------------------------|------------------------|----------------------------|----------------------------|----------------------------|----------------------------|
|                                |                        | Crude OR (95% CI)          | Adjusted OR (95% CI)       | Crude OR (95% CI)          | Adjusted OR (95% CI)       |
| Social Isolation Index score   | 0                      | 1.00 (reference)           | 1.00 (reference)           | 1.00 (reference)           | 1.00 (reference)           |
|                                | 1                      | 1.92** (1.19–3.10)         | 1.56† (0.94–2.60)          | 1.14 (0.94–1.39)           | 1.11 (0.87–1.41)           |
|                                | 2                      | 2.15** (1.28–3.62)         | 1.71† (0.98–2.99)          | 1.32** (1.09–1.60)         | 1.20 (0.95–1.51)           |
|                                | 3                      | 3.19*** (1.73–5.90)        | 2.50** (1.27–4.90)         | 1.57*** (1.30–1.90)        | 1.30* (1.03–1.64)          |
|                                | ≥ 4                    | 3.85** (1.46–10.18)        | 5.17** (1.83–14.66)        | 2.26*** (1.83–2.79)        | 1.47** (1.13–1.91)         |
|                                |                        | <i>p</i> for trend < 0.001 | <i>p</i> for trend < 0.001 | <i>p</i> for trend < 0.001 | <i>p</i> for trend < 0.001 |
| Age (years)                    | 65–69                  |                            | 1.00 (reference)           |                            | 1.00 (reference)           |
|                                | 70–74                  |                            | 1.37 (0.83–2.25)           |                            | 1.16** (1.05–1.30)         |
|                                | 75–79                  |                            | 1.24 (0.71–2.14)           |                            | 1.31*** (1.16–1.48)        |
|                                | 80–84                  |                            | 1.66† (0.92–2.99)          |                            | 1.60*** (1.37–1.88)        |
|                                | ≥ 85                   |                            | 0.97 (0.45–2.09)           |                            | 1.79*** (1.39–2.30)        |
| Gender                         | Male                   |                            | 1.00 (reference)           |                            | 1.00 (reference)           |
|                                | Female                 |                            | 1.58* (1.07–2.34)          |                            | 1.00 (0.90–1.11)           |
| Educational attainment (years) | < 15                   |                            | 1.00 (reference)           |                            | 1.00 (reference)           |
|                                | 16–18                  |                            | 1.05 (0.68–1.60)           |                            | 0.81*** (0.74–0.89)        |
|                                | ≥ 19                   |                            | 1.30 (0.70–2.41)           |                            | 0.68*** (0.60–0.78)        |
| Household equivalised income   | 1st quintile (lowest)  |                            | 1.00 (reference)           |                            | 1.00 (reference)           |
|                                | 2nd quintile           |                            | 0.70 (0.40–0.21)           |                            | 0.95 (0.83–1.09)           |
|                                | 3rd quintile           |                            | 1.11 (0.66–1.87)           |                            | 0.76*** (0.67–0.87)        |
|                                | 4th quintile           |                            | 0.82 (0.45–1.50)           |                            | 0.67*** (0.57–0.79)        |
|                                | 5th quintile (highest) |                            | 0.84 (0.42–1.68)           |                            | 0.65*** (0.56–0.76)        |

|                         |            |                     |                     |
|-------------------------|------------|---------------------|---------------------|
| Cancer                  | No         | 1.00 (reference)    | 1.00 (reference)    |
|                         | Yes        | 0.95 (0.32–2.81)    | 1.16 (0.93–1.43)    |
| Heart disease           | No         | 1.00 (reference)    | 1.00 (reference)    |
|                         | Yes        | 1.13 (0.67–1.92)    | 1.20 (1.05–1.37)    |
| Stroke                  | No         | 1.00 (reference)    | 1.00 (reference)    |
|                         | Yes        | 1.3 (0.56–3.02)     | 1.18 (0.80–1.73)    |
| Self-rated health       | Good       | 1.00 (reference)    | 1.00 (reference)    |
|                         | Poor       | 1.71* (1.13–2.59)   | 1.63*** (1.44–1.85) |
| CES-D score at baseline |            | 1.90*** (1.60–2.25) |                     |
| GDS 8 score at baseline |            |                     | 1.92*** (1.86–1.99) |
| Smoking                 | Never/past | 1.00 (reference)    | 1.00 (reference)    |
|                         | Current    | 0.76 (0.76–1.56)    | 1.29*** (1.12–1.48) |
| Drinking                | Never/past | 1.00 (reference)    | 1.00 (reference)    |
|                         | Current    | 1.41 (0.81 – 2.44)  | 1.02 (0.93 – 1.13)  |

\*,  $p < 0.05$ ; \*\*,  $p < 0.01$ ; \*\*\*,  $p < 0.001$ ; †,  $p < 0.1$

ELSA, English Longitudinal Study of Ageing; JAGES, Japan Gerontological Evaluation Study; CES-D 8, eight items from the Center for Epidemiologic Studies Depression Scale; CI, confidence interval; GDS, Geriatric Depression Scale; OR, odds ratio

**Supplementary Table 2. Association between sub-components of social isolation and depression onset, by complete case analysis**

|                                                   |                        | ELSA                |                      | JAGES               |                      |
|---------------------------------------------------|------------------------|---------------------|----------------------|---------------------|----------------------|
|                                                   |                        | Crude OR (95% CI)   | Adjusted OR (95% CI) | Crude OR (95% CI)   | Adjusted OR (95% CI) |
| Social Isolation Index sub-components (ref; none) |                        |                     |                      |                     |                      |
| Unmarried or living alone                         |                        | 1.91*** (1.34–2.72) | 1.27 (0.84–1.93)     | 1.33*** (1.18–1.49) | 1.02 (0.88–1.19)     |
| Poor interaction with children                    |                        | 1.08 (0.68–1.74)    | 1.51 (0.91–2.50)     | 1.01 (0.98–1.10)    | 1.13* (1.02–1.25)    |
| Poor interaction with relatives                   |                        | 1.25 (0.83–1.90)    | 1.33 (0.85–2.08)     | 1.05 (0.97–1.13)    | 0.98 (0.90–1.08)     |
| Poor interaction with friends                     |                        | 1.19 (0.78–1.80)    | 1.21 (0.78–1.87)     | 1.23 (1.14–1.33)    | 1.11* (1.01–1.22)    |
| No social participation                           |                        | 1.54* (1.08–2.19)   | 1.46† (0.98–2.16)    | 1.70 (1.56–1.86)    | 1.22*** (1.09–1.36)  |
| Age (years)                                       | 65–69                  |                     | 1.00 (reference)     |                     | 1.00 (reference)     |
|                                                   | 70–74                  |                     | 1.37 (0.83–2.25)     |                     | 1.17** (1.05–1.30)   |
|                                                   | 75–79                  |                     | 1.25 (0.72–2.17)     |                     | 1.31*** (1.16–1.49)  |
|                                                   | 80–84                  |                     | 1.68† (0.92–3.04)    |                     | 1.60*** (1.36–1.88)  |
|                                                   | ≥ 85                   |                     | 1.00 (0.46–2.21)     |                     | 1.78*** (1.38–2.30)  |
| Gender                                            | Male                   |                     | 1.00 (reference)     |                     | 1.00 (reference)     |
|                                                   | Female                 |                     | 1.59* (1.07–2.37)    |                     | 1.00 (0.89–1.11)     |
| Educational attainment (years)                    | < 15                   |                     | 1.00 (reference)     |                     | 1.00 (reference)     |
|                                                   | 10–12                  |                     | 1.04 (0.67–1.60)     |                     | 0.81*** (0.74–0.90)  |
|                                                   | ≥ 19                   |                     | 1.31 (0.70–2.46)     |                     | 0.69*** (0.61–0.78)  |
| Household equivalised income                      | 1st quintile (lowest)  |                     | 1.00 (reference)     |                     | 1.00 (reference)     |
|                                                   | 2nd quintile           |                     | 0.71 (0.41–1.23)     |                     | 0.95 (0.83–1.09)     |
|                                                   | 3rd quintile           |                     | 1.13 (0.67–1.93)     |                     | 0.76*** (0.67–0.86)  |
|                                                   | 4th quintile           |                     | 0.83 (0.45–1.52)     |                     | 0.67*** (0.57–0.79)  |
|                                                   | 5th quintile (highest) |                     | 0.85 (0.42–1.71)     |                     | 0.66*** (0.57–0.76)  |
| Cancer                                            | No                     |                     | 1.00 (reference)     |                     | 1.00 (reference)     |
|                                                   | Yes                    |                     | 0.95 (0.32–2.81)     |                     | 1.15 (0.93–1.43)     |

|                           |            |                     |                     |
|---------------------------|------------|---------------------|---------------------|
| Heart disease             | No         | 1.00 (reference)    | 1.00 (reference)    |
|                           | Yes        | 1.16 (0.69–1.96)    | 1.20** (1.05–1.37)  |
| Stroke                    | No         | 1.00 (reference)    | 1.00 (reference)    |
|                           | Yes        | 1.28 (0.55–2.99)    | 1.18 (0.80–1.73)    |
| Self-rated health         | Good       | 1.00 (reference)    | 1.00 (reference)    |
|                           | Poor       | 1.71* (1.13–2.58)   | 1.62*** (1.43–1.83) |
| CES-D 8 score at baseline |            | 1.89*** (1.59–2.25) | 1.00 (reference)    |
| GDS score at baseline     |            |                     | 1.92*** (1.85–1.99) |
| Smoking                   | Never/past | 1.00 (reference)    | 1.00 (reference)    |
|                           | Current    | 0.74 (0.36–1.53)    | 1.29*** (1.13–1.48) |
| Drinking                  | Never/past | 1.00 (reference)    | 1.00 (reference)    |
|                           | Current    | 1.39 (0.80–2.40)    | 1.03 (0.93–1.14)    |

\*,  $p < 0.05$ ; \*\*,  $p < 0.01$ ; \*\*\*,  $p < 0.001$ ; †,  $p < 0.1$

ELSA, English Longitudinal Study of Ageing; JAGES, Japan Gerontological Evaluation Study; CES-D 8, eight items from the Center for Epidemiologic Studies Depression Scale; CI, confidence interval; GDS, Geriatric Depression Scale; OR, odds ratio
